# Supplementary material for: Scalable single-cell profiling of chromatin modifications with sciCUT&Tag
Source: Nat Protoc. Author manuscript; Available in PMC 2024 Jul 8. (PMC11229882; doi:10.1038/s41596-023-00905-9)
Supplement: Supplementary Table 1 [file NIHMS1990485-supplement-Supplementary_Table_1.xlsx]

## Sheet: Barcoded - s5 s7 adapters
Modified From Amini et al (2014) PMID: 25326703 Supplementary Table 4; called "P5_i5_x_Universal_Connector_A_C15_ME" and "P7_i7_x_Universal_Connector_B_D15_ME"
Barcoded Tn5 sequence s5	TCGTCGGCAGCGTCTCCACGC[8-bp Tn5 index]GCGATCGAGGACGGCAGATGTGTATAAGAGACAG
Barcoded Tn5 sequence s7	GTCTCGTGGGCTCGGCTGTCCCTGTCC[8-bp Tn5 index]CACCGTCTCCGCCTCAGATGTGTATAAGAGACAG
Tn5MErev	/5Phos/CTGTCTCTTATACACATCT
P5_s5_1	TCGTCGGCAGCGTCTCCACGCTATAGCCTGCGATCGAGGACGGCAGATGTGTATAAGAGACAG	P5_s5_1	TATAGCCT
P5_s5_2	TCGTCGGCAGCGTCTCCACGCATAGAGGCGCGATCGAGGACGGCAGATGTGTATAAGAGACAG	P5_s5_2	ATAGAGGC
P5_s5_3	TCGTCGGCAGCGTCTCCACGCCCTATCCTGCGATCGAGGACGGCAGATGTGTATAAGAGACAG	P5_s5_3	CCTATCCT
P5_s5_4	TCGTCGGCAGCGTCTCCACGCTTCTCGTAGCGATCGAGGACGGCAGATGTGTATAAGAGACAG	P5_s5_9	TTCTCGTA
P5_s5_5	TCGTCGGCAGCGTCTCCACGCAGGCGAAGGCGATCGAGGACGGCAGATGTGTATAAGAGACAG	P5_s5_5	AGGCGAAG
P5_s5_6	TCGTCGGCAGCGTCTCCACGCTAATCTTAGCGATCGAGGACGGCAGATGTGTATAAGAGACAG	P5_s5_6	TAATCTTA
P5_s5_7	TCGTCGGCAGCGTCTCCACGCCAGGACGTGCGATCGAGGACGGCAGATGTGTATAAGAGACAG	P5_s5_7	CAGGACGT
P5_s5_8	TCGTCGGCAGCGTCTCCACGCGTACTGACGCGATCGAGGACGGCAGATGTGTATAAGAGACAG	P5_s5_8	GTACTGAC
P7_s7_1	GTCTCGTGGGCTCGGCTGTCCCTGTCCCGAGTAATCACCGTCTCCGCCTCAGATGTGTATAAGAGACAG	P7_s7_1	CGAGTAAT
P7_s7_2	GTCTCGTGGGCTCGGCTGTCCCTGTCCTCTCCGGACACCGTCTCCGCCTCAGATGTGTATAAGAGACAG	P7_s7_2	TCTCCGGA
P7_s7_3	GTCTCGTGGGCTCGGCTGTCCCTGTCCAATGAGCGCACCGTCTCCGCCTCAGATGTGTATAAGAGACAG	P7_s7_3	AATGAGCG
P7_s7_4	GTCTCGTGGGCTCGGCTGTCCCTGTCCGGAATCTCCACCGTCTCCGCCTCAGATGTGTATAAGAGACAG	P7_s7_4	GGAATCTC
P7_s7_5	GTCTCGTGGGCTCGGCTGTCCCTGTCCTTCTGAATCACCGTCTCCGCCTCAGATGTGTATAAGAGACAG	P7_s7_5	TTCTGAAT
P7_s7_6	GTCTCGTGGGCTCGGCTGTCCCTGTCCACGAATTCCACCGTCTCCGCCTCAGATGTGTATAAGAGACAG	P7_s7_6	ACGAATTC
P7_s7_7	GTCTCGTGGGCTCGGCTGTCCCTGTCCAGCTTCAGCACCGTCTCCGCCTCAGATGTGTATAAGAGACAG	P7_s7_7	AGCTTCAG
P7_s7_8	GTCTCGTGGGCTCGGCTGTCCCTGTCCGCGCATTACACCGTCTCCGCCTCAGATGTGTATAAGAGACAG	P7_s7_8	GCGCATTA
P7_s7_9	GTCTCGTGGGCTCGGCTGTCCCTGTCCCATAGCCGCACCGTCTCCGCCTCAGATGTGTATAAGAGACAG	P7_s7_9	CATAGCCG
P7_s7_10	GTCTCGTGGGCTCGGCTGTCCCTGTCCTTCGCGGACACCGTCTCCGCCTCAGATGTGTATAAGAGACAG	P7_s7_10	TTCGCGGA
P7_s7_11	GTCTCGTGGGCTCGGCTGTCCCTGTCCGCGCGAGACACCGTCTCCGCCTCAGATGTGTATAAGAGACAG	P7_s7_11	GCGCGAGA
P7_s7_12	GTCTCGTGGGCTCGGCTGTCCCTGTCCCTATCGCTCACCGTCTCCGCCTCAGATGTGTATAAGAGACAG	P7_s7_12	CTATCGCT

## Sheet: Barcoded - i5 i7 primers
Designed by Hatice Kaya-Okur. Compatible with Amini (2014) barcoded Tn5 adaptor set. Call Amini barcodes "i5" and "i7", then Kaya-Okur barcodes "j5" and "j7"
Custom Barcodes Primer 1 (index i5):
sci_Ad1.1_TAGATCGC	AATGATACGGCGACCACCGAGATCTACACTAGATCGCTCGTCGGCAGCGTCTCCACGC	sci_Ad1.1	TAGATCGC
sci_Ad1.2_CTCTCTAT	AATGATACGGCGACCACCGAGATCTACACCTCTCTATTCGTCGGCAGCGTCTCCACGC	sci_Ad1.2	CTCTCTAT
sci_Ad1.3_TATCCTCT	AATGATACGGCGACCACCGAGATCTACACTATCCTCTTCGTCGGCAGCGTCTCCACGC	sci_Ad1.3	TATCCTCT
sci_Ad1.4_AGAGTAGA	AATGATACGGCGACCACCGAGATCTACACAGAGTAGATCGTCGGCAGCGTCTCCACGC	sci_Ad1.4	AGAGTAGA
sci_Ad1.5_GTAAGGAG	AATGATACGGCGACCACCGAGATCTACACGTAAGGAGTCGTCGGCAGCGTCTCCACGC	sci_Ad1.5	GTAAGGAG
sci_Ad1.6_ACTGCATA	AATGATACGGCGACCACCGAGATCTACACACTGCATATCGTCGGCAGCGTCTCCACGC	sci_Ad1.6	ACTGCATA
sci_Ad1.7_AAGGAGTA	AATGATACGGCGACCACCGAGATCTACACAAGGAGTATCGTCGGCAGCGTCTCCACGC	sci_Ad1.7	AAGGAGTA
sci_Ad1.8_CTAAGCCT	AATGATACGGCGACCACCGAGATCTACACCTAAGCCTTCGTCGGCAGCGTCTCCACGC	sci_Ad1.8	CTAAGCCT
sci_Ad1.9_TGGAAATC	AATGATACGGCGACCACCGAGATCTACACTGGAAATCTCGTCGGCAGCGTCTCCACGC	sci_Ad1.9	TGGAAATC
sci_Ad1.10_AACATGAT	AATGATACGGCGACCACCGAGATCTACACAACATGATTCGTCGGCAGCGTCTCCACGC	sci_Ad1.10	AACATGAT
sci_Ad1.11_TGATGAAA	AATGATACGGCGACCACCGAGATCTACACTGATGAAATCGTCGGCAGCGTCTCCACGC	sci_Ad1.11	TGATGAAA
sci_Ad1.12_GTCGGACT	AATGATACGGCGACCACCGAGATCTACACGTCGGACTTCGTCGGCAGCGTCTCCACGC	sci_Ad1.12	GTCGGACT
sci_Ad1.13_TTTCTAGC	AATGATACGGCGACCACCGAGATCTACACTTTCTAGCTCGTCGGCAGCGTCTCCACGC	sci_Ad1.13	TTTCTAGC
sci_Ad1.14_TAACCAAG	AATGATACGGCGACCACCGAGATCTACACTAACCAAGTCGTCGGCAGCGTCTCCACGC	sci_Ad1.14	TAACCAAG
sci_Ad1.15_GTGTATCG	AATGATACGGCGACCACCGAGATCTACACGTGTATCGTCGTCGGCAGCGTCTCCACGC	sci_Ad1.15	GTGTATCG
sci_Ad1.16_TCCATCAA	AATGATACGGCGACCACCGAGATCTACACTCCATCAATCGTCGGCAGCGTCTCCACGC	sci_Ad1.16	TCCATCAA
sci_Ad1.17_TTCGTGCA	AATGATACGGCGACCACCGAGATCTACACTTCGTGCATCGTCGGCAGCGTCTCCACGC	sci_Ad1.17	TTCGTGCA
sci_Ad1.18_AGGTTGCC	AATGATACGGCGACCACCGAGATCTACACAGGTTGCCTCGTCGGCAGCGTCTCCACGC	sci_Ad1.18	AGGTTGCC
sci_Ad1.19_CCTTATGT	AATGATACGGCGACCACCGAGATCTACACCCTTATGTTCGTCGGCAGCGTCTCCACGC	sci_Ad1.19	CCTTATGT
sci_Ad1.20_CAGCAACG	AATGATACGGCGACCACCGAGATCTACACCAGCAACGTCGTCGGCAGCGTCTCCACGC	sci_Ad1.20	CAGCAACG
sci_Ad1.21_GGTTCAAT	AATGATACGGCGACCACCGAGATCTACACGGTTCAATTCGTCGGCAGCGTCTCCACGC	sci_Ad1.21	GGTTCAAT
sci_Ad1.22_ACATTCGT	AATGATACGGCGACCACCGAGATCTACACACATTCGTTCGTCGGCAGCGTCTCCACGC	sci_Ad1.22	ACATTCGT
sci_Ad1.23_GATTCCCA	AATGATACGGCGACCACCGAGATCTACACGATTCCCATCGTCGGCAGCGTCTCCACGC	sci_Ad1.23	GATTCCCA
sci_Ad1.24_CGGACTGC	AATGATACGGCGACCACCGAGATCTACACCGGACTGCTCGTCGGCAGCGTCTCCACGC	sci_Ad1.24	CGGACTGC
sci_Ad1.25_AGCCGTTC	AATGATACGGCGACCACCGAGATCTACACAGCCGTTCTCGTCGGCAGCGTCTCCACGC	sci_Ad1.25	AGCCGTTC
sci_Ad1.26_ATTGGGTC	AATGATACGGCGACCACCGAGATCTACACATTGGGTCTCGTCGGCAGCGTCTCCACGC	sci_Ad1.26	ATTGGGTC
sci_Ad1.27_TGCATACT	AATGATACGGCGACCACCGAGATCTACACTGCATACTTCGTCGGCAGCGTCTCCACGC	sci_Ad1.27	TGCATACT
sci_Ad1.28_GGGCTTGG	AATGATACGGCGACCACCGAGATCTACACGGGCTTGGTCGTCGGCAGCGTCTCCACGC	sci_Ad1.28	GGGCTTGG
sci_Ad1.29_GACGTGGC	AATGATACGGCGACCACCGAGATCTACACGACGTGGCTCGTCGGCAGCGTCTCCACGC	sci_Ad1.29	GACGTGGC
sci_Ad1.30_GCAAATTT	AATGATACGGCGACCACCGAGATCTACACGCAAATTTTCGTCGGCAGCGTCTCCACGC	sci_Ad1.30	GCAAATTT
sci_Ad1.31_GCAGCCTC	AATGATACGGCGACCACCGAGATCTACACGCAGCCTCTCGTCGGCAGCGTCTCCACGC	sci_Ad1.31	GCAGCCTC
sci_Ad1.32_TCCGAGTT	AATGATACGGCGACCACCGAGATCTACACTCCGAGTTTCGTCGGCAGCGTCTCCACGC	sci_Ad1.32	TCCGAGTT
sci_Ad1.33_GCATTAAG	AATGATACGGCGACCACCGAGATCTACACGCATTAAGTCGTCGGCAGCGTCTCCACGC	sci_Ad1.33	GCATTAAG
sci_Ad1.34_ACGATAAC	AATGATACGGCGACCACCGAGATCTACACACGATAACTCGTCGGCAGCGTCTCCACGC	sci_Ad1.34	ACGATAAC
sci_Ad1.35_CCTGCGGG	AATGATACGGCGACCACCGAGATCTACACCCTGCGGGTCGTCGGCAGCGTCTCCACGC	sci_Ad1.35	CCTGCGGG
sci_Ad1.36_TGATTGTT	AATGATACGGCGACCACCGAGATCTACACTGATTGTTTCGTCGGCAGCGTCTCCACGC	sci_Ad1.36	TGATTGTT
sci_Ad1.37_GGCACGGA	AATGATACGGCGACCACCGAGATCTACACGGCACGGATCGTCGGCAGCGTCTCCACGC	sci_Ad1.37	GGCACGGA
sci_Ad1.38_GATCATTC	AATGATACGGCGACCACCGAGATCTACACGATCATTCTCGTCGGCAGCGTCTCCACGC	sci_Ad1.38	GATCATTC
sci_Ad1.39_ATGGTCAT	AATGATACGGCGACCACCGAGATCTACACATGGTCATTCGTCGGCAGCGTCTCCACGC	sci_Ad1.39	ATGGTCAT
sci_Ad1.40_CGTACCAA	AATGATACGGCGACCACCGAGATCTACACCGTACCAATCGTCGGCAGCGTCTCCACGC	sci_Ad1.40	CGTACCAA
sci_Ad1.41_CCAGTTTA	AATGATACGGCGACCACCGAGATCTACACCCAGTTTATCGTCGGCAGCGTCTCCACGC	sci_Ad1.41	CCAGTTTA
sci_Ad1.42_ACCGGCCC	AATGATACGGCGACCACCGAGATCTACACACCGGCCCTCGTCGGCAGCGTCTCCACGC	sci_Ad1.42	ACCGGCCC
sci_Ad1.43_CTAGAAGT	AATGATACGGCGACCACCGAGATCTACACCTAGAAGTTCGTCGGCAGCGTCTCCACGC	sci_Ad1.43	CTAGAAGT
sci_Ad1.44_CGCCAGAT	AATGATACGGCGACCACCGAGATCTACACCGCCAGATTCGTCGGCAGCGTCTCCACGC	sci_Ad1.44	CGCCAGAT
sci_Ad1.45_TCACATGG	AATGATACGGCGACCACCGAGATCTACACTCACATGGTCGTCGGCAGCGTCTCCACGC	sci_Ad1.45	TCACATGG
sci_Ad1.46_GAACTCGA	AATGATACGGCGACCACCGAGATCTACACGAACTCGATCGTCGGCAGCGTCTCCACGC	sci_Ad1.46	GAACTCGA
sci_Ad1.47_CCACCGTT	AATGATACGGCGACCACCGAGATCTACACCCACCGTTTCGTCGGCAGCGTCTCCACGC	sci_Ad1.47	CCACCGTT
sci_Ad1.48_TAAGTTAC	AATGATACGGCGACCACCGAGATCTACACTAAGTTACTCGTCGGCAGCGTCTCCACGC	sci_Ad1.48	TAAGTTAC
sci_Ad1.49_GAGACGTG	AATGATACGGCGACCACCGAGATCTACACGAGACGTGTCGTCGGCAGCGTCTCCACGC	sci_Ad1.49	GAGACGTG
sci_Ad1.50_TTGCCTAA	AATGATACGGCGACCACCGAGATCTACACTTGCCTAATCGTCGGCAGCGTCTCCACGC	sci_Ad1.50	TTGCCTAA
sci_Ad1.51_TTAACTTG	AATGATACGGCGACCACCGAGATCTACACTTAACTTGTCGTCGGCAGCGTCTCCACGC	sci_Ad1.51	TTAACTTG
sci_Ad1.52_CTTTAACA	AATGATACGGCGACCACCGAGATCTACACCTTTAACATCGTCGGCAGCGTCTCCACGC	sci_Ad1.52	CTTTAACA
sci_Ad1.53_CGTAGACC	AATGATACGGCGACCACCGAGATCTACACCGTAGACCTCGTCGGCAGCGTCTCCACGC	sci_Ad1.53	CGTAGACC
sci_Ad1.54_TATTTGCG	AATGATACGGCGACCACCGAGATCTACACTATTTGCGTCGTCGGCAGCGTCTCCACGC	sci_Ad1.54	TATTTGCG
sci_Ad1.55_ATCCAGGA	AATGATACGGCGACCACCGAGATCTACACATCCAGGATCGTCGGCAGCGTCTCCACGC	sci_Ad1.55	ATCCAGGA
sci_Ad1.56_TGTTCCTG	AATGATACGGCGACCACCGAGATCTACACTGTTCCTGTCGTCGGCAGCGTCTCCACGC	sci_Ad1.56	TGTTCCTG
sci_Ad1.57_ACGCGCAG	AATGATACGGCGACCACCGAGATCTACACACGCGCAGTCGTCGGCAGCGTCTCCACGC	sci_Ad1.57	ACGCGCAG
sci_Ad1.58_TCTGGCGA	AATGATACGGCGACCACCGAGATCTACACTCTGGCGATCGTCGGCAGCGTCTCCACGC	sci_Ad1.58	TCTGGCGA
sci_Ad1.59_AATCTACA	AATGATACGGCGACCACCGAGATCTACACAATCTACATCGTCGGCAGCGTCTCCACGC	sci_Ad1.59	AATCTACA
sci_Ad1.60_TACTGACC	AATGATACGGCGACCACCGAGATCTACACTACTGACCTCGTCGGCAGCGTCTCCACGC	sci_Ad1.60	TACTGACC
sci_Ad1.61_CGATAGGG	AATGATACGGCGACCACCGAGATCTACACCGATAGGGTCGTCGGCAGCGTCTCCACGC	sci_Ad1.61	CGATAGGG
sci_Ad1.62_ACTTAGAA	AATGATACGGCGACCACCGAGATCTACACACTTAGAATCGTCGGCAGCGTCTCCACGC	sci_Ad1.62	ACTTAGAA
sci_Ad1.63_AGAGATCT	AATGATACGGCGACCACCGAGATCTACACAGAGATCTTCGTCGGCAGCGTCTCCACGC	sci_Ad1.63	AGAGATCT
sci_Ad1.64_GGTGAAGG	AATGATACGGCGACCACCGAGATCTACACGGTGAAGGTCGTCGGCAGCGTCTCCACGC	sci_Ad1.64	GGTGAAGG
sci_Ad1.65_ATCGAATG	AATGATACGGCGACCACCGAGATCTACACATCGAATGTCGTCGGCAGCGTCTCCACGC	sci_Ad1.65	ATCGAATG
sci_Ad1.66_TCAAGAGC	AATGATACGGCGACCACCGAGATCTACACTCAAGAGCTCGTCGGCAGCGTCTCCACGC	sci_Ad1.66	TCAAGAGC
sci_Ad1.67_GCCCACGT	AATGATACGGCGACCACCGAGATCTACACGCCCACGTTCGTCGGCAGCGTCTCCACGC	sci_Ad1.67	GCCCACGT
sci_Ad1.68_TGGGCGGT	AATGATACGGCGACCACCGAGATCTACACTGGGCGGTTCGTCGGCAGCGTCTCCACGC	sci_Ad1.68	TGGGCGGT
sci_Ad1.69_CCCTTGGA	AATGATACGGCGACCACCGAGATCTACACCCCTTGGATCGTCGGCAGCGTCTCCACGC	sci_Ad1.69	CCCTTGGA
sci_Ad1.70_ATTACCGT	AATGATACGGCGACCACCGAGATCTACACATTACCGTTCGTCGGCAGCGTCTCCACGC	sci_Ad1.70	ATTACCGT
sci_Ad1.71_AGTCCGAG	AATGATACGGCGACCACCGAGATCTACACAGTCCGAGTCGTCGGCAGCGTCTCCACGC	sci_Ad1.71	AGTCCGAG
sci_Ad1.72_ACTTGTTG	AATGATACGGCGACCACCGAGATCTACACACTTGTTGTCGTCGGCAGCGTCTCCACGC	sci_Ad1.72	ACTTGTTG
sci_Ad1.73_GTAATACA	AATGATACGGCGACCACCGAGATCTACACGTAATACATCGTCGGCAGCGTCTCCACGC	sci_Ad1.73	GTAATACA
sci_Ad1.74_GGCGTCTA	AATGATACGGCGACCACCGAGATCTACACGGCGTCTATCGTCGGCAGCGTCTCCACGC	sci_Ad1.74	GGCGTCTA
sci_Ad1.75_GCGCTGCT	AATGATACGGCGACCACCGAGATCTACACGCGCTGCTTCGTCGGCAGCGTCTCCACGC	sci_Ad1.75	GCGCTGCT
sci_Ad1.76_GTGCCATT	AATGATACGGCGACCACCGAGATCTACACGTGCCATTTCGTCGGCAGCGTCTCCACGC	sci_Ad1.76	GTGCCATT
sci_Ad1.77_TAGGTATG	AATGATACGGCGACCACCGAGATCTACACTAGGTATGTCGTCGGCAGCGTCTCCACGC	sci_Ad1.77	TAGGTATG
sci_Ad1.78_AACACCTA	AATGATACGGCGACCACCGAGATCTACACAACACCTATCGTCGGCAGCGTCTCCACGC	sci_Ad1.78	AACACCTA
sci_Ad1.79_CTCCGAAC	AATGATACGGCGACCACCGAGATCTACACCTCCGAACTCGTCGGCAGCGTCTCCACGC	sci_Ad1.79	CTCCGAAC
sci_Ad1.80_CAACGGCA	AATGATACGGCGACCACCGAGATCTACACCAACGGCATCGTCGGCAGCGTCTCCACGC	sci_Ad1.80	CAACGGCA
sci_Ad1.81_CAATGTAG	AATGATACGGCGACCACCGAGATCTACACCAATGTAGTCGTCGGCAGCGTCTCCACGC	sci_Ad1.81	CAATGTAG
sci_Ad1.82_GGCTACCC	AATGATACGGCGACCACCGAGATCTACACGGCTACCCTCGTCGGCAGCGTCTCCACGC	sci_Ad1.82	GGCTACCC
sci_Ad1.83_AAAGTCCG	AATGATACGGCGACCACCGAGATCTACACAAAGTCCGTCGTCGGCAGCGTCTCCACGC	sci_Ad1.83	AAAGTCCG
sci_Ad1.84_TTCCGCGG	AATGATACGGCGACCACCGAGATCTACACTTCCGCGGTCGTCGGCAGCGTCTCCACGC	sci_Ad1.84	TTCCGCGG
sci_Ad1.85_AGGCACTT	AATGATACGGCGACCACCGAGATCTACACAGGCACTTTCGTCGGCAGCGTCTCCACGC	sci_Ad1.85	AGGCACTT
sci_Ad1.86_CTTCAGTG	AATGATACGGCGACCACCGAGATCTACACCTTCAGTGTCGTCGGCAGCGTCTCCACGC	sci_Ad1.86	CTTCAGTG
sci_Ad1.87_GCCGGTAG	AATGATACGGCGACCACCGAGATCTACACGCCGGTAGTCGTCGGCAGCGTCTCCACGC	sci_Ad1.87	GCCGGTAG
sci_Ad1.88_TTCAATCC	AATGATACGGCGACCACCGAGATCTACACTTCAATCCTCGTCGGCAGCGTCTCCACGC	sci_Ad1.88	TTCAATCC
sci_Ad1.89_CCACACAC	AATGATACGGCGACCACCGAGATCTACACCCACACACTCGTCGGCAGCGTCTCCACGC	sci_Ad1.89	CCACACAC
sci_Ad1.90_ATATTATC	AATGATACGGCGACCACCGAGATCTACACATATTATCTCGTCGGCAGCGTCTCCACGC	sci_Ad1.90	ATATTATC
sci_Ad1.91_CCGAAGCA	AATGATACGGCGACCACCGAGATCTACACCCGAAGCATCGTCGGCAGCGTCTCCACGC	sci_Ad1.91	CCGAAGCA
sci_Ad1.92_GTATCGGT	AATGATACGGCGACCACCGAGATCTACACGTATCGGTTCGTCGGCAGCGTCTCCACGC	sci_Ad1.92	GTATCGGT
Custom Barcodes Primer 2 (index i7):
sci_Ad2.1_TAAGGCGA	CAAGCAGAAGACGGCATACGAGATTCGCCTTAGTCTCGTGGGCTCGGCTGTCCCTGTCC	sci_Ad2.1	TAAGGCGA
sci_Ad2.2_CGTACTAG	CAAGCAGAAGACGGCATACGAGATCTAGTACGGTCTCGTGGGCTCGGCTGTCCCTGTCC	sci_Ad2.2	CGTACTAG
sci_Ad2.3_AGGCAGAA	CAAGCAGAAGACGGCATACGAGATTTCTGCCTGTCTCGTGGGCTCGGCTGTCCCTGTCC	sci_Ad2.3	AGGCAGAA
sci_Ad2.4_TCCTGAGC	CAAGCAGAAGACGGCATACGAGATGCTCAGGAGTCTCGTGGGCTCGGCTGTCCCTGTCC	sci_Ad2.4	TCCTGAGC
sci_Ad2.5_GGACTCCT	CAAGCAGAAGACGGCATACGAGATAGGAGTCCGTCTCGTGGGCTCGGCTGTCCCTGTCC	sci_Ad2.5	GGACTCCT
sci_Ad2.6_TAGGCATG	CAAGCAGAAGACGGCATACGAGATCATGCCTAGTCTCGTGGGCTCGGCTGTCCCTGTCC	sci_Ad2.6	TAGGCATG
sci_Ad2.7_CTCTCTAC	CAAGCAGAAGACGGCATACGAGATGTAGAGAGGTCTCGTGGGCTCGGCTGTCCCTGTCC	sci_Ad2.7	CTCTCTAC
sci_Ad2.8_CAGAGAGG	CAAGCAGAAGACGGCATACGAGATCCTCTCTGGTCTCGTGGGCTCGGCTGTCCCTGTCC	sci_Ad2.8	CAGAGAGG
sci_Ad2.9_GCTACGCT	CAAGCAGAAGACGGCATACGAGATAGCGTAGCGTCTCGTGGGCTCGGCTGTCCCTGTCC	sci_Ad2.9	GCTACGCT
sci_Ad2.10_CGAGGCTG	CAAGCAGAAGACGGCATACGAGATCAGCCTCGGTCTCGTGGGCTCGGCTGTCCCTGTCC	sci_Ad2.10	CGAGGCTG
sci_Ad2.11_AAGAGGCA	CAAGCAGAAGACGGCATACGAGATTGCCTCTTGTCTCGTGGGCTCGGCTGTCCCTGTCC	sci_Ad2.11	AAGAGGCA
sci_Ad2.12_GTAGAGGA	CAAGCAGAAGACGGCATACGAGATTCCTCTACGTCTCGTGGGCTCGGCTGTCCCTGTCC	sci_Ad2.12	GTAGAGGA
sci_Ad2.13_TGGATCTG	CAAGCAGAAGACGGCATACGAGATCAGATCCAGTCTCGTGGGCTCGGCTGTCCCTGTCC	sci_Ad2.13	TGGATCTG
sci_Ad2.14_CCGTTTGT	CAAGCAGAAGACGGCATACGAGATACAAACGGGTCTCGTGGGCTCGGCTGTCCCTGTCC	sci_Ad2.14	CCGTTTGT
sci_Ad2.15_TGCTGGGT	CAAGCAGAAGACGGCATACGAGATACCCAGCAGTCTCGTGGGCTCGGCTGTCCCTGTCC	sci_Ad2.15	TGCTGGGT
sci_Ad2.16_AGGTTGGG	CAAGCAGAAGACGGCATACGAGATCCCAACCTGTCTCGTGGGCTCGGCTGTCCCTGTCC	sci_Ad2.16	AGGTTGGG
sci_Ad2.17_GTGTGGTG	CAAGCAGAAGACGGCATACGAGATCACCACACGTCTCGTGGGCTCGGCTGTCCCTGTCC	sci_Ad2.17	GTGTGGTG
sci_Ad2.18_TGGGTTTC	CAAGCAGAAGACGGCATACGAGATGAAACCCAGTCTCGTGGGCTCGGCTGTCCCTGTCC	sci_Ad2.18	TGGGTTTC
sci_Ad2.19_TGGTCACA	CAAGCAGAAGACGGCATACGAGATTGTGACCAGTCTCGTGGGCTCGGCTGTCCCTGTCC	sci_Ad2.19	TGGTCACA
sci_Ad2.20_TTGACCCT	CAAGCAGAAGACGGCATACGAGATAGGGTCAAGTCTCGTGGGCTCGGCTGTCCCTGTCC	sci_Ad2.20	TTGACCCT
sci_Ad2.21_CGCGGACA	CAAGCAGAAGACGGCATACGAGATTGTCCGCGGTCTCGTGGGCTCGGCTGTCCCTGTCC	sci_Ad2.21	CGCGGACA
sci_Ad2.22_TTCCATAT	CAAGCAGAAGACGGCATACGAGATATATGGAAGTCTCGTGGGCTCGGCTGTCCCTGTCC	sci_Ad2.22	TTCCATAT
sci_Ad2.23_AATTCGTT	CAAGCAGAAGACGGCATACGAGATAACGAATTGTCTCGTGGGCTCGGCTGTCCCTGTCC	sci_Ad2.23	AATTCGTT
sci_Ad2.24_GGCGTCGA	CAAGCAGAAGACGGCATACGAGATTCGACGCCGTCTCGTGGGCTCGGCTGTCCCTGTCC	sci_Ad2.24	GGCGTCGA
sci_Ad2.25_ACAAAGTG	CAAGCAGAAGACGGCATACGAGATCACTTTGTGTCTCGTGGGCTCGGCTGTCCCTGTCC	sci_Ad2.25	ACAAAGTG
sci_Ad2.26_TACTTGAA	CAAGCAGAAGACGGCATACGAGATTTCAAGTAGTCTCGTGGGCTCGGCTGTCCCTGTCC	sci_Ad2.26	TACTTGAA
sci_Ad2.27_GTGATAGC	CAAGCAGAAGACGGCATACGAGATGCTATCACGTCTCGTGGGCTCGGCTGTCCCTGTCC	sci_Ad2.27	GTGATAGC
sci_Ad2.28_AGTAGATT	CAAGCAGAAGACGGCATACGAGATAATCTACTGTCTCGTGGGCTCGGCTGTCCCTGTCC	sci_Ad2.28	AGTAGATT
sci_Ad2.29_ATTGCCGG	CAAGCAGAAGACGGCATACGAGATCCGGCAATGTCTCGTGGGCTCGGCTGTCCCTGTCC	sci_Ad2.29	ATTGCCGG
sci_Ad2.30_TTGCTAAG	CAAGCAGAAGACGGCATACGAGATCTTAGCAAGTCTCGTGGGCTCGGCTGTCCCTGTCC	sci_Ad2.30	TTGCTAAG
sci_Ad2.31_ATAAGTTA	CAAGCAGAAGACGGCATACGAGATTAACTTATGTCTCGTGGGCTCGGCTGTCCCTGTCC	sci_Ad2.31	ATAAGTTA
sci_Ad2.32_ATCACTCG	CAAGCAGAAGACGGCATACGAGATCGAGTGATGTCTCGTGGGCTCGGCTGTCCCTGTCC	sci_Ad2.32	ATCACTCG
sci_Ad2.33_GTTAACAG	CAAGCAGAAGACGGCATACGAGATCTGTTAACGTCTCGTGGGCTCGGCTGTCCCTGTCC	sci_Ad2.33	GTTAACAG
sci_Ad2.34_AATGGTAG	CAAGCAGAAGACGGCATACGAGATCTACCATTGTCTCGTGGGCTCGGCTGTCCCTGTCC	sci_Ad2.34	AATGGTAG
sci_Ad2.35_GAGCACGT	CAAGCAGAAGACGGCATACGAGATACGTGCTCGTCTCGTGGGCTCGGCTGTCCCTGTCC	sci_Ad2.35	GAGCACGT
sci_Ad2.36_TTTCGTCA	CAAGCAGAAGACGGCATACGAGATTGACGAAAGTCTCGTGGGCTCGGCTGTCCCTGTCC	sci_Ad2.36	TTTCGTCA
sci_Ad2.37_CAAGAATT	CAAGCAGAAGACGGCATACGAGATAATTCTTGGTCTCGTGGGCTCGGCTGTCCCTGTCC	sci_Ad2.37	CAAGAATT
sci_Ad2.38_GAAATGCC	CAAGCAGAAGACGGCATACGAGATGGCATTTCGTCTCGTGGGCTCGGCTGTCCCTGTCC	sci_Ad2.38	GAAATGCC
sci_Ad2.39_AACGCCAT	CAAGCAGAAGACGGCATACGAGATATGGCGTTGTCTCGTGGGCTCGGCTGTCCCTGTCC	sci_Ad2.39	AACGCCAT
sci_Ad2.40_CCTCGCAG	CAAGCAGAAGACGGCATACGAGATCTGCGAGGGTCTCGTGGGCTCGGCTGTCCCTGTCC	sci_Ad2.40	CCTCGCAG
sci_Ad2.41_TACACCTC	CAAGCAGAAGACGGCATACGAGATGAGGTGTAGTCTCGTGGGCTCGGCTGTCCCTGTCC	sci_Ad2.41	TACACCTC
sci_Ad2.42_GGTCATTT	CAAGCAGAAGACGGCATACGAGATAAATGACCGTCTCGTGGGCTCGGCTGTCCCTGTCC	sci_Ad2.42	GGTCATTT
sci_Ad2.43_CAATCTTA	CAAGCAGAAGACGGCATACGAGATTAAGATTGGTCTCGTGGGCTCGGCTGTCCCTGTCC	sci_Ad2.43	CAATCTTA
sci_Ad2.44_TGTGCCTT	CAAGCAGAAGACGGCATACGAGATAAGGCACAGTCTCGTGGGCTCGGCTGTCCCTGTCC	sci_Ad2.44	TGTGCCTT
sci_Ad2.45_TCTTATTA	CAAGCAGAAGACGGCATACGAGATTAATAAGAGTCTCGTGGGCTCGGCTGTCCCTGTCC	sci_Ad2.45	TCTTATTA
sci_Ad2.46_GACTTAGT	CAAGCAGAAGACGGCATACGAGATACTAAGTCGTCTCGTGGGCTCGGCTGTCCCTGTCC	sci_Ad2.46	GACTTAGT
sci_Ad2.47_AGACCAGC	CAAGCAGAAGACGGCATACGAGATGCTGGTCTGTCTCGTGGGCTCGGCTGTCCCTGTCC	sci_Ad2.47	AGACCAGC
sci_Ad2.48_AAATACAG	CAAGCAGAAGACGGCATACGAGATCTGTATTTGTCTCGTGGGCTCGGCTGTCCCTGTCC	sci_Ad2.48	AAATACAG
sci_Ad2.49_TTATGAAA	CAAGCAGAAGACGGCATACGAGATTTTCATAAGTCTCGTGGGCTCGGCTGTCCCTGTCC	sci_Ad2.49	TTATGAAA
sci_Ad2.50_CTTGGGTC	CAAGCAGAAGACGGCATACGAGATGACCCAAGGTCTCGTGGGCTCGGCTGTCCCTGTCC	sci_Ad2.50	CTTGGGTC
sci_Ad2.51_CCAAATAA	CAAGCAGAAGACGGCATACGAGATTTATTTGGGTCTCGTGGGCTCGGCTGTCCCTGTCC	sci_Ad2.51	CCAAATAA
sci_Ad2.52_GCGTTAAA	CAAGCAGAAGACGGCATACGAGATTTTAACGCGTCTCGTGGGCTCGGCTGTCCCTGTCC	sci_Ad2.52	GCGTTAAA
sci_Ad2.53_CATCCTGT	CAAGCAGAAGACGGCATACGAGATACAGGATGGTCTCGTGGGCTCGGCTGTCCCTGTCC	sci_Ad2.53	CATCCTGT
sci_Ad2.54_GGAGTAAG	CAAGCAGAAGACGGCATACGAGATCTTACTCCGTCTCGTGGGCTCGGCTGTCCCTGTCC	sci_Ad2.54	GGAGTAAG
sci_Ad2.55_GACGCTCC	CAAGCAGAAGACGGCATACGAGATGGAGCGTCGTCTCGTGGGCTCGGCTGTCCCTGTCC	sci_Ad2.55	GACGCTCC
sci_Ad2.56_TTCGCGGC	CAAGCAGAAGACGGCATACGAGATGCCGCGAAGTCTCGTGGGCTCGGCTGTCCCTGTCC	sci_Ad2.56	TTCGCGGC
sci_Ad2.57_CGGTTCCC	CAAGCAGAAGACGGCATACGAGATGGGAACCGGTCTCGTGGGCTCGGCTGTCCCTGTCC	sci_Ad2.57	CGGTTCCC
sci_Ad2.58_ACCGGCTA	CAAGCAGAAGACGGCATACGAGATTAGCCGGTGTCTCGTGGGCTCGGCTGTCCCTGTCC	sci_Ad2.58	ACCGGCTA
sci_Ad2.59_CTCATGGG	CAAGCAGAAGACGGCATACGAGATCCCATGAGGTCTCGTGGGCTCGGCTGTCCCTGTCC	sci_Ad2.59	CTCATGGG
sci_Ad2.60_TTTAATGC	CAAGCAGAAGACGGCATACGAGATGCATTAAAGTCTCGTGGGCTCGGCTGTCCCTGTCC	sci_Ad2.60	TTTAATGC
sci_Ad2.61_AAACGGTC	CAAGCAGAAGACGGCATACGAGATGACCGTTTGTCTCGTGGGCTCGGCTGTCCCTGTCC	sci_Ad2.61	AAACGGTC
sci_Ad2.62_GATCCAAA	CAAGCAGAAGACGGCATACGAGATTTTGGATCGTCTCGTGGGCTCGGCTGTCCCTGTCC	sci_Ad2.62	GATCCAAA
sci_Ad2.63_ATGATGAT	CAAGCAGAAGACGGCATACGAGATATCATCATGTCTCGTGGGCTCGGCTGTCCCTGTCC	sci_Ad2.63	ATGATGAT
sci_Ad2.64_CCAACACG	CAAGCAGAAGACGGCATACGAGATCGTGTTGGGTCTCGTGGGCTCGGCTGTCCCTGTCC	sci_Ad2.64	CCAACACG
sci_Ad2.65_TAACAACA	CAAGCAGAAGACGGCATACGAGATTGTTGTTAGTCTCGTGGGCTCGGCTGTCCCTGTCC	sci_Ad2.65	TAACAACA
sci_Ad2.66_GGTAAACC	CAAGCAGAAGACGGCATACGAGATGGTTTACCGTCTCGTGGGCTCGGCTGTCCCTGTCC	sci_Ad2.66	GGTAAACC
sci_Ad2.67_CATCGACC	CAAGCAGAAGACGGCATACGAGATGGTCGATGGTCTCGTGGGCTCGGCTGTCCCTGTCC	sci_Ad2.67	CATCGACC
sci_Ad2.68_ATGGGAAC	CAAGCAGAAGACGGCATACGAGATGTTCCCATGTCTCGTGGGCTCGGCTGTCCCTGTCC	sci_Ad2.68	ATGGGAAC
sci_Ad2.69_CGGCCAAT	CAAGCAGAAGACGGCATACGAGATATTGGCCGGTCTCGTGGGCTCGGCTGTCCCTGTCC	sci_Ad2.69	CGGCCAAT
sci_Ad2.70_GGGAATGA	CAAGCAGAAGACGGCATACGAGATTCATTCCCGTCTCGTGGGCTCGGCTGTCCCTGTCC	sci_Ad2.70	GGGAATGA
sci_Ad2.71_GTATTCGG	CAAGCAGAAGACGGCATACGAGATCCGAATACGTCTCGTGGGCTCGGCTGTCCCTGTCC	sci_Ad2.71	GTATTCGG
sci_Ad2.72_TCAGCTAT	CAAGCAGAAGACGGCATACGAGATATAGCTGAGTCTCGTGGGCTCGGCTGTCCCTGTCC	sci_Ad2.72	TCAGCTAT
sci_Ad2.73_ATTTATCT	CAAGCAGAAGACGGCATACGAGATAGATAAATGTCTCGTGGGCTCGGCTGTCCCTGTCC	sci_Ad2.73	ATTTATCT
sci_Ad2.74_ACAGTTGC	CAAGCAGAAGACGGCATACGAGATGCAACTGTGTCTCGTGGGCTCGGCTGTCCCTGTCC	sci_Ad2.74	ACAGTTGC
sci_Ad2.75_CCCGAGAT	CAAGCAGAAGACGGCATACGAGATATCTCGGGGTCTCGTGGGCTCGGCTGTCCCTGTCC	sci_Ad2.75	CCCGAGAT
sci_Ad2.76_TAATGTCT	CAAGCAGAAGACGGCATACGAGATAGACATTAGTCTCGTGGGCTCGGCTGTCCCTGTCC	sci_Ad2.76	TAATGTCT
sci_Ad2.77_GCCAATTC	CAAGCAGAAGACGGCATACGAGATGAATTGGCGTCTCGTGGGCTCGGCTGTCCCTGTCC	sci_Ad2.77	GCCAATTC
sci_Ad2.78_CGCCGTGC	CAAGCAGAAGACGGCATACGAGATGCACGGCGGTCTCGTGGGCTCGGCTGTCCCTGTCC	sci_Ad2.78	CGCCGTGC
sci_Ad2.79_CTGACCGA	CAAGCAGAAGACGGCATACGAGATTCGGTCAGGTCTCGTGGGCTCGGCTGTCCCTGTCC	sci_Ad2.79	CTGACCGA
sci_Ad2.80_CATTTCGA	CAAGCAGAAGACGGCATACGAGATTCGAAATGGTCTCGTGGGCTCGGCTGTCCCTGTCC	sci_Ad2.80	CATTTCGA
sci_Ad2.81_GCTTGCCA	CAAGCAGAAGACGGCATACGAGATTGGCAAGCGTCTCGTGGGCTCGGCTGTCCCTGTCC	sci_Ad2.81	GCTTGCCA
sci_Ad2.82_TTCTACCA	CAAGCAGAAGACGGCATACGAGATTGGTAGAAGTCTCGTGGGCTCGGCTGTCCCTGTCC	sci_Ad2.82	TTCTACCA
sci_Ad2.83_ACGTGACG	CAAGCAGAAGACGGCATACGAGATCGTCACGTGTCTCGTGGGCTCGGCTGTCCCTGTCC	sci_Ad2.83	ACGTGACG
sci_Ad2.84_TGTCCGCG	CAAGCAGAAGACGGCATACGAGATCGCGGACAGTCTCGTGGGCTCGGCTGTCCCTGTCC	sci_Ad2.84	TGTCCGCG
sci_Ad2.85_TTAAACTT	CAAGCAGAAGACGGCATACGAGATAAGTTTAAGTCTCGTGGGCTCGGCTGTCCCTGTCC	sci_Ad2.85	TTAAACTT
sci_Ad2.86_ACCACAAC	CAAGCAGAAGACGGCATACGAGATGTTGTGGTGTCTCGTGGGCTCGGCTGTCCCTGTCC	sci_Ad2.86	ACCACAAC
sci_Ad2.87_GCCTCTGG	CAAGCAGAAGACGGCATACGAGATCCAGAGGCGTCTCGTGGGCTCGGCTGTCCCTGTCC	sci_Ad2.87	GCCTCTGG
sci_Ad2.88_TCGCCCAC	CAAGCAGAAGACGGCATACGAGATGTGGGCGAGTCTCGTGGGCTCGGCTGTCCCTGTCC	sci_Ad2.88	TCGCCCAC
sci_Ad2.89_CACTAGGC	CAAGCAGAAGACGGCATACGAGATGCCTAGTGGTCTCGTGGGCTCGGCTGTCCCTGTCC	sci_Ad2.89	CACTAGGC
sci_Ad2.90_TCGAAGCC	CAAGCAGAAGACGGCATACGAGATGGCTTCGAGTCTCGTGGGCTCGGCTGTCCCTGTCC	sci_Ad2.90	TCGAAGCC
sci_Ad2.91_GCATGTAC	CAAGCAGAAGACGGCATACGAGATGTACATGCGTCTCGTGGGCTCGGCTGTCCCTGTCC	sci_Ad2.91	GCATGTAC
sci_Ad2.92_GTTCGAGT	CAAGCAGAAGACGGCATACGAGATACTCGAACGTCTCGTGGGCTCGGCTGTCCCTGTCC	sci_Ad2.92	GTTCGAGT
sci_Ad2.93_CCGGGCGC	CAAGCAGAAGACGGCATACGAGATGCGCCCGGGTCTCGTGGGCTCGGCTGTCCCTGTCC	sci_Ad2.93	CCGGGCGC
sci_Ad2.94_AGATTTAA	CAAGCAGAAGACGGCATACGAGATTTAAATCTGTCTCGTGGGCTCGGCTGTCCCTGTCC	sci_Ad2.94	AGATTTAA
sci_Ad2.95_CACCATTG	CAAGCAGAAGACGGCATACGAGATCAATGGTGGTCTCGTGGGCTCGGCTGTCCCTGTCC	sci_Ad2.95	CACCATTG
sci_Ad2.96_AATAAGAC	CAAGCAGAAGACGGCATACGAGATGTCTTATTGTCTCGTGGGCTCGGCTGTCCCTGTCC	sci_Ad2.96	AATAAGAC

## Sheet: Custom Sequencing Primers
Designed by Christine Codomo.
NextSeq_Read1_seq_primer	GAGGACGGCAGATGTGTATAAGAGACAG
NextSeq_Index1_seq_primer	CATCTGAGGCGGAGACGGTG
NextSeq_Read2_seq_primer	GTCTCCGCCTCAGATGTGTATAAGAGACAG
NextSeq_Index2_seq_primer	CATCTGCCGTCCTCGATCGC
100 nmole scale, standard desalting
