# Supplementary material for: Scalable single-cell profiling of chromatin modifications with sciCUT&Tag
Source: Nat Protoc. Author manuscript; Available in PMC 2024 Jul 8. (PMC11229882; doi:10.1038/s41596-023-00905-9)
Supplement: Supplementary Table 2 [file NIHMS1990485-supplement-Supplementary_Table_2.xlsx]

## Sheet: Sheet1
s5Xs7	ATTACTCG	TCCGGAGA	CGCTCATT	GAGATTCC	ATTCAGAA	GAATTCGT	CTGAAGCT	TAATGCGC	CGGCTATG	TCCGCGAA	TCTCGCGC	AGCGATAG
TATAGCCT	s5-1	s5-1	s5-1	s5-1	s5-1	s5-1	s5-1	s5-1	s5-1	s5-1	s5-1	s5-1
	s7-1	s7-2	s7-3	s7-4	s7-5	s7-6	s7-7	s7-8	s7-9	s7-10	s7-11	s7-12
ATAGAGGC	s5-2	s5-2	s5-2	s5-2	s5-2	s5-2	s5-2	s5-2	s5-2	s5-2	s5-2	s5-2
	s7-1	s7-2	s7-3	s7-4	s7-5	s7-6	s7-7	s7-8	s7-9	s7-10	s7-11	s7-12
CCTATCCT	s5-3	s5-3	s5-3	s5-3	s5-3	s5-3	s5-3	s5-3	s5-3	s5-3	s5-3	s5-3
	s7-1	s7-2	s7-3	s7-4	s7-5	s7-6	s7-7	s7-8	s7-9	s7-10	s7-11	s7-12
TTCTCGTA	s5-4	s5-4	s5-4	s5-4	s5-4	s5-4	s5-4	s5-4	s5-4	s5-4	s5-4	s5-4
	s7-1	s7-2	s7-3	s7-4	s7-5	s7-6	s7-7	s7-8	s7-9	s7-10	s7-11	s7-12
AGGCGAAG	s5-5	s5-5	s5-5	s5-5	s5-5	s5-5	s5-5	s5-5	s5-5	s5-5	s5-5	s5-5
	s7-1	s7-2	s7-3	s7-4	s7-5	s7-1	s7-7	s7-8	s7-9	s7-10	s7-11	s7-12
TAATCTTA	s5-6	s5-6	s5-6	s5-6	s5-6	s5-6	s5-6	s5-6	s5-6	s5-6	s5-6	s5-6
	s7-1	s7-2	s7-3	s7-4	s7-5	s7-6	s7-7	s7-8	s7-9	s7-10	s7-11	s7-12
CAGGACGT	s5-7	s5-7	s5-7	s5-7	s5-7	s5-7	s5-7	s5-7	s5-7	s5-7	s5-7	s5-7
	s7-1	s7-2	s7-3	s7-4	s7-5	s7-6	s7-7	s7-8	s7-9	s7-10	s7-11	s7-12
GTACTGAC	s5-8	s5-8	s5-8	s5-8	s5-8	s5-8	s5-8	s5-8	s5-8	s5-8	s5-8	s5-8
	s7-1	s7-2	s7-3	s7-4	s7-5	s7-6	s7-7	s7-8	s7-9	s7-10	s7-11	s7-12
