# Supplementary material for: Scalable single-cell profiling of chromatin modifications with sciCUT&Tag
Source: Nat Protoc. Author manuscript; Available in PMC 2024 Jul 8. (PMC11229882; doi:10.1038/s41596-023-00905-9)
Supplement: Supplementary Table 3 [file NIHMS1990485-supplement-Supplementary_Table_3.xlsx]

## Sheet: Sheet1
					i5								i7
	1	2	3	4	5	6	7	8	9	10	11	12	13	14	15	16	17	18	19	20	21	22	23	24
A					1	17	33	49	65	69			1	17	33	49	65	69
B					2	18	34	50	66	70			2	18	34	50	66	70
C					3	19	35	51	67	71			3	19	35	51	67	71
D					4	20	36	52	68	72			4	20	36	52	68	72
E					5	21	37	53					5	21	37	53
F					6	22	38	54					6	22	38	54
G					7	23	39	55					7	23	39	55
H					8	24	40	56					8	24	40	56
I					9	25	41	57					9	25	41	57
J					10	26	42	58					10	26	42	58
K					11	27	43	59					11	27	43	59
L					12	28	44	60					12	28	44	60
M					13	29	45	61					13	29	45	61
N					14	30	46	62					14	30	46	62
O					15	31	47	63					15	31	47	63
P					16	32	48	64					16	32	48	64
