# Supplementary material for: Scalable single-cell profiling of chromatin modifications with sciCUT&Tag
Source: Nat Protoc. Author manuscript; Available in PMC 2024 Jul 8. (PMC11229882; doi:10.1038/s41596-023-00905-9)
Supplement: Supplementary Table 5 [file NIHMS1990485-supplement-Supplementary_Table_5.xlsx]

## Sheet: Sheet1
row	column	i7_index_seq	i5_index_seq	i7_index_id	i5_index_id	comb_index_seq	ID
0	1	TAAGGCGA	GTAAGGAG	P7_1	P5_5	TAAGGCGAGTAAGGAG	1X_220527
0	2	TAAGGCGA	TGGAAATC	P7_1	P5_9	TAAGGCGATGGAAATC	1X_220527
0	3	TAAGGCGA	TTTCTAGC	P7_1	P5_13	TAAGGCGATTTCTAGC	1X_220527
0	4	TAAGGCGA	GCATTAAG	P7_1	P5_33	TAAGGCGAGCATTAAG	1X_220527
0	6	TAAGGCGA	CCAGTTTA	P7_1	P5_41	TAAGGCGACCAGTTTA	1X_220527
0	7	TAAGGCGA	TCACATGG	P7_1	P5_45	TAAGGCGATCACATGG	1X_220527
0	8	TAAGGCGA	ATCGAATG	P7_1	P5_65	TAAGGCGAATCGAATG	1X_220527
0	9	TAAGGCGA	TTCGTGCA	P7_1	P5_17	TAAGGCGATTCGTGCA	1X_220527
0	10	TAAGGCGA	GGTTCAAT	P7_1	P5_21	TAAGGCGAGGTTCAAT	1X_220527
0	11	TAAGGCGA	AGCCGTTC	P7_1	P5_25	TAAGGCGAAGCCGTTC	1X_220527
0	12	TAAGGCGA	GACGTGGC	P7_1	P5_29	TAAGGCGAGACGTGGC	1X_220527
0	13	TAAGGCGA	GAGACGTG	P7_1	P5_49	TAAGGCGAGAGACGTG	1X_220527
0	14	TAAGGCGA	CGTAGACC	P7_1	P5_53	TAAGGCGACGTAGACC	1X_220527
0	15	TAAGGCGA	ACGCGCAG	P7_1	P5_57	TAAGGCGAACGCGCAG	1X_220527
0	16	TAAGGCGA	CGATAGGG	P7_1	P5_61	TAAGGCGACGATAGGG	1X_220527
0	17	TAAGGCGA	CCCTTGGA	P7_1	P5_69	TAAGGCGACCCTTGGA	1X_220527
0	18	TAAGGCGA	AGAGTAGA	P7_1	P5_4	TAAGGCGAAGAGTAGA	1X_220527
0	19	TAAGGCGA	CTAAGCCT	P7_1	P5_8	TAAGGCGACTAAGCCT	1X_220527
0	20	TAAGGCGA	GTCGGACT	P7_1	P5_12	TAAGGCGAGTCGGACT	1X_220527
0	21	TAAGGCGA	TCCATCAA	P7_1	P5_16	TAAGGCGATCCATCAA	1X_220527
0	22	TAAGGCGA	TGATTGTT	P7_1	P5_36	TAAGGCGATGATTGTT	1X_220527
0	23	TAAGGCGA	CGTACCAA	P7_1	P5_40	TAAGGCGACGTACCAA	1X_220527
0	24	TAAGGCGA	CGCCAGAT	P7_1	P5_44	TAAGGCGACGCCAGAT	1X_220527
0	25	TAAGGCGA	TAAGTTAC	P7_1	P5_48	TAAGGCGATAAGTTAC	1X_220527
0	26	TAAGGCGA	TGGGCGGT	P7_1	P5_68	TAAGGCGATGGGCGGT	1X_220527
0	27	TAAGGCGA	CAGCAACG	P7_1	P5_20	TAAGGCGACAGCAACG	1X_220527
0	28	TAAGGCGA	CGGACTGC	P7_1	P5_24	TAAGGCGACGGACTGC	1X_220527
0	29	TAAGGCGA	GGGCTTGG	P7_1	P5_28	TAAGGCGAGGGCTTGG	1X_220527
0	30	TAAGGCGA	TCCGAGTT	P7_1	P5_32	TAAGGCGATCCGAGTT	1X_220527
0	31	TAAGGCGA	CTTTAACA	P7_1	P5_52	TAAGGCGACTTTAACA	1X_220527
0	32	TAAGGCGA	TGTTCCTG	P7_1	P5_56	TAAGGCGATGTTCCTG	1X_220527
0	33	TAAGGCGA	TACTGACC	P7_1	P5_60	TAAGGCGATACTGACC	1X_220527
0	34	TAAGGCGA	GGTGAAGG	P7_1	P5_64	TAAGGCGAGGTGAAGG	1X_220527
0	35	TAAGGCGA	ACTTGTTG	P7_1	P5_72	TAAGGCGAACTTGTTG	1X_220527
0	36	TAAGGCGA	TATCCTCT	P7_1	P5_3	TAAGGCGATATCCTCT	1X_220527
0	37	TAAGGCGA	AAGGAGTA	P7_1	P5_7	TAAGGCGAAAGGAGTA	1X_220527
0	38	TAAGGCGA	TGATGAAA	P7_1	P5_11	TAAGGCGATGATGAAA	1X_220527
0	39	TAAGGCGA	GTGTATCG	P7_1	P5_15	TAAGGCGAGTGTATCG	1X_220527
0	40	TAAGGCGA	CCTGCGGG	P7_1	P5_35	TAAGGCGACCTGCGGG	1X_220527
0	41	TAAGGCGA	ATGGTCAT	P7_1	P5_39	TAAGGCGAATGGTCAT	1X_220527
0	42	TAAGGCGA	CTAGAAGT	P7_1	P5_43	TAAGGCGACTAGAAGT	1X_220527
0	43	TAAGGCGA	CCACCGTT	P7_1	P5_47	TAAGGCGACCACCGTT	1X_220527
0	44	TAAGGCGA	GCCCACGT	P7_1	P5_67	TAAGGCGAGCCCACGT	1X_220527
0	45	TAAGGCGA	CCTTATGT	P7_1	P5_19	TAAGGCGACCTTATGT	1X_220527
0	46	TAAGGCGA	GATTCCCA	P7_1	P5_23	TAAGGCGAGATTCCCA	1X_220527
0	47	TAAGGCGA	TGCATACT	P7_1	P5_27	TAAGGCGATGCATACT	1X_220527
0	48	TAAGGCGA	GCAGCCTC	P7_1	P5_31	TAAGGCGAGCAGCCTC	1X_220527
0	49	TAAGGCGA	TTAACTTG	P7_1	P5_51	TAAGGCGATTAACTTG	1X_220527
0	50	TAAGGCGA	ATCCAGGA	P7_1	P5_55	TAAGGCGAATCCAGGA	1X_220527
0	51	TAAGGCGA	AATCTACA	P7_1	P5_59	TAAGGCGAAATCTACA	1X_220527
0	52	TAAGGCGA	AGAGATCT	P7_1	P5_63	TAAGGCGAAGAGATCT	1X_220527
0	53	TAAGGCGA	AGTCCGAG	P7_1	P5_71	TAAGGCGAAGTCCGAG	1X_220527
0	54	TAAGGCGA	CTCTCTAT	P7_1	P5_2	TAAGGCGACTCTCTAT	1X_220527
0	55	TAAGGCGA	ACTGCATA	P7_1	P5_6	TAAGGCGAACTGCATA	1X_220527
0	56	TAAGGCGA	AACATGAT	P7_1	P5_10	TAAGGCGAAACATGAT	1X_220527
0	57	TAAGGCGA	TAACCAAG	P7_1	P5_14	TAAGGCGATAACCAAG	1X_220527
0	58	TAAGGCGA	ACGATAAC	P7_1	P5_34	TAAGGCGAACGATAAC	1X_220527
0	59	TAAGGCGA	GATCATTC	P7_1	P5_38	TAAGGCGAGATCATTC	1X_220527
0	60	TAAGGCGA	ACCGGCCC	P7_1	P5_42	TAAGGCGAACCGGCCC	1X_220527
0	61	TAAGGCGA	GAACTCGA	P7_1	P5_46	TAAGGCGAGAACTCGA	1X_220527
0	62	TAAGGCGA	TCAAGAGC	P7_1	P5_66	TAAGGCGATCAAGAGC	1X_220527
0	63	TAAGGCGA	AGGTTGCC	P7_1	P5_18	TAAGGCGAAGGTTGCC	1X_220527
0	64	TAAGGCGA	ACATTCGT	P7_1	P5_22	TAAGGCGAACATTCGT	1X_220527
0	65	TAAGGCGA	ATTGGGTC	P7_1	P5_26	TAAGGCGAATTGGGTC	1X_220527
0	67	TAAGGCGA	TTGCCTAA	P7_1	P5_50	TAAGGCGATTGCCTAA	1X_220527
0	68	TAAGGCGA	TATTTGCG	P7_1	P5_54	TAAGGCGATATTTGCG	1X_220527
0	69	TAAGGCGA	TCTGGCGA	P7_1	P5_58	TAAGGCGATCTGGCGA	1X_220527
0	70	TAAGGCGA	ACTTAGAA	P7_1	P5_62	TAAGGCGAACTTAGAA	1X_220527
1	0	GGACTCCT	TAGATCGC	P7_5	P5_1	GGACTCCTTAGATCGC	1X_220527
1	1	GGACTCCT	GTAAGGAG	P7_5	P5_5	GGACTCCTGTAAGGAG	1X_220527
1	2	GGACTCCT	TGGAAATC	P7_5	P5_9	GGACTCCTTGGAAATC	1X_220527
1	3	GGACTCCT	TTTCTAGC	P7_5	P5_13	GGACTCCTTTTCTAGC	1X_220527
1	4	GGACTCCT	GCATTAAG	P7_5	P5_33	GGACTCCTGCATTAAG	1X_220527
1	5	GGACTCCT	GGCACGGA	P7_5	P5_37	GGACTCCTGGCACGGA	1X_220527
1	6	GGACTCCT	CCAGTTTA	P7_5	P5_41	GGACTCCTCCAGTTTA	1X_220527
1	7	GGACTCCT	TCACATGG	P7_5	P5_45	GGACTCCTTCACATGG	1X_220527
1	8	GGACTCCT	ATCGAATG	P7_5	P5_65	GGACTCCTATCGAATG	1X_220527
1	9	GGACTCCT	TTCGTGCA	P7_5	P5_17	GGACTCCTTTCGTGCA	1X_220527
1	10	GGACTCCT	GGTTCAAT	P7_5	P5_21	GGACTCCTGGTTCAAT	1X_220527
1	11	GGACTCCT	AGCCGTTC	P7_5	P5_25	GGACTCCTAGCCGTTC	1X_220527
1	12	GGACTCCT	GACGTGGC	P7_5	P5_29	GGACTCCTGACGTGGC	1X_220527
1	13	GGACTCCT	GAGACGTG	P7_5	P5_49	GGACTCCTGAGACGTG	1X_220527
1	14	GGACTCCT	CGTAGACC	P7_5	P5_53	GGACTCCTCGTAGACC	1X_220527
1	15	GGACTCCT	ACGCGCAG	P7_5	P5_57	GGACTCCTACGCGCAG	1X_220527
1	16	GGACTCCT	CGATAGGG	P7_5	P5_61	GGACTCCTCGATAGGG	1X_220527
1	17	GGACTCCT	CCCTTGGA	P7_5	P5_69	GGACTCCTCCCTTGGA	1X_220527
1	18	GGACTCCT	AGAGTAGA	P7_5	P5_4	GGACTCCTAGAGTAGA	1X_220527
1	19	GGACTCCT	CTAAGCCT	P7_5	P5_8	GGACTCCTCTAAGCCT	1X_220527
1	20	GGACTCCT	GTCGGACT	P7_5	P5_12	GGACTCCTGTCGGACT	1X_220527
1	21	GGACTCCT	TCCATCAA	P7_5	P5_16	GGACTCCTTCCATCAA	1X_220527
1	22	GGACTCCT	TGATTGTT	P7_5	P5_36	GGACTCCTTGATTGTT	1X_220527
1	23	GGACTCCT	CGTACCAA	P7_5	P5_40	GGACTCCTCGTACCAA	1X_220527
1	24	GGACTCCT	CGCCAGAT	P7_5	P5_44	GGACTCCTCGCCAGAT	1X_220527
1	25	GGACTCCT	TAAGTTAC	P7_5	P5_48	GGACTCCTTAAGTTAC	1X_220527
1	26	GGACTCCT	TGGGCGGT	P7_5	P5_68	GGACTCCTTGGGCGGT	1X_220527
1	27	GGACTCCT	CAGCAACG	P7_5	P5_20	GGACTCCTCAGCAACG	1X_220527
1	28	GGACTCCT	CGGACTGC	P7_5	P5_24	GGACTCCTCGGACTGC	1X_220527
1	29	GGACTCCT	GGGCTTGG	P7_5	P5_28	GGACTCCTGGGCTTGG	1X_220527
1	30	GGACTCCT	TCCGAGTT	P7_5	P5_32	GGACTCCTTCCGAGTT	1X_220527
1	31	GGACTCCT	CTTTAACA	P7_5	P5_52	GGACTCCTCTTTAACA	1X_220527
1	32	GGACTCCT	TGTTCCTG	P7_5	P5_56	GGACTCCTTGTTCCTG	1X_220527
1	33	GGACTCCT	TACTGACC	P7_5	P5_60	GGACTCCTTACTGACC	1X_220527
1	34	GGACTCCT	GGTGAAGG	P7_5	P5_64	GGACTCCTGGTGAAGG	1X_220527
1	35	GGACTCCT	ACTTGTTG	P7_5	P5_72	GGACTCCTACTTGTTG	1X_220527
1	36	GGACTCCT	TATCCTCT	P7_5	P5_3	GGACTCCTTATCCTCT	1X_220527
1	37	GGACTCCT	AAGGAGTA	P7_5	P5_7	GGACTCCTAAGGAGTA	1X_220527
1	38	GGACTCCT	TGATGAAA	P7_5	P5_11	GGACTCCTTGATGAAA	1X_220527
1	39	GGACTCCT	GTGTATCG	P7_5	P5_15	GGACTCCTGTGTATCG	1X_220527
1	40	GGACTCCT	CCTGCGGG	P7_5	P5_35	GGACTCCTCCTGCGGG	1X_220527
1	41	GGACTCCT	ATGGTCAT	P7_5	P5_39	GGACTCCTATGGTCAT	1X_220527
1	42	GGACTCCT	CTAGAAGT	P7_5	P5_43	GGACTCCTCTAGAAGT	1X_220527
1	43	GGACTCCT	CCACCGTT	P7_5	P5_47	GGACTCCTCCACCGTT	1X_220527
1	44	GGACTCCT	GCCCACGT	P7_5	P5_67	GGACTCCTGCCCACGT	1X_220527
1	45	GGACTCCT	CCTTATGT	P7_5	P5_19	GGACTCCTCCTTATGT	1X_220527
1	46	GGACTCCT	GATTCCCA	P7_5	P5_23	GGACTCCTGATTCCCA	1X_220527
1	47	GGACTCCT	TGCATACT	P7_5	P5_27	GGACTCCTTGCATACT	1X_220527
1	48	GGACTCCT	GCAGCCTC	P7_5	P5_31	GGACTCCTGCAGCCTC	1X_220527
1	49	GGACTCCT	TTAACTTG	P7_5	P5_51	GGACTCCTTTAACTTG	1X_220527
1	50	GGACTCCT	ATCCAGGA	P7_5	P5_55	GGACTCCTATCCAGGA	1X_220527
1	51	GGACTCCT	AATCTACA	P7_5	P5_59	GGACTCCTAATCTACA	1X_220527
1	52	GGACTCCT	AGAGATCT	P7_5	P5_63	GGACTCCTAGAGATCT	1X_220527
1	53	GGACTCCT	AGTCCGAG	P7_5	P5_71	GGACTCCTAGTCCGAG	1X_220527
1	54	GGACTCCT	CTCTCTAT	P7_5	P5_2	GGACTCCTCTCTCTAT	1X_220527
1	55	GGACTCCT	ACTGCATA	P7_5	P5_6	GGACTCCTACTGCATA	1X_220527
1	56	GGACTCCT	AACATGAT	P7_5	P5_10	GGACTCCTAACATGAT	1X_220527
1	57	GGACTCCT	TAACCAAG	P7_5	P5_14	GGACTCCTTAACCAAG	1X_220527
1	58	GGACTCCT	ACGATAAC	P7_5	P5_34	GGACTCCTACGATAAC	1X_220527
1	59	GGACTCCT	GATCATTC	P7_5	P5_38	GGACTCCTGATCATTC	1X_220527
1	60	GGACTCCT	ACCGGCCC	P7_5	P5_42	GGACTCCTACCGGCCC	1X_220527
1	61	GGACTCCT	GAACTCGA	P7_5	P5_46	GGACTCCTGAACTCGA	1X_220527
1	62	GGACTCCT	TCAAGAGC	P7_5	P5_66	GGACTCCTTCAAGAGC	1X_220527
1	63	GGACTCCT	AGGTTGCC	P7_5	P5_18	GGACTCCTAGGTTGCC	1X_220527
1	64	GGACTCCT	ACATTCGT	P7_5	P5_22	GGACTCCTACATTCGT	1X_220527
1	65	GGACTCCT	ATTGGGTC	P7_5	P5_26	GGACTCCTATTGGGTC	1X_220527
1	66	GGACTCCT	GCAAATTT	P7_5	P5_30	GGACTCCTGCAAATTT	1X_220527
1	67	GGACTCCT	TTGCCTAA	P7_5	P5_50	GGACTCCTTTGCCTAA	1X_220527
1	68	GGACTCCT	TATTTGCG	P7_5	P5_54	GGACTCCTTATTTGCG	1X_220527
1	69	GGACTCCT	TCTGGCGA	P7_5	P5_58	GGACTCCTTCTGGCGA	1X_220527
1	70	GGACTCCT	ACTTAGAA	P7_5	P5_62	GGACTCCTACTTAGAA	1X_220527
1	71	GGACTCCT	ATTACCGT	P7_5	P5_70	GGACTCCTATTACCGT	1X_220527
2	0	GCTACGCT	TAGATCGC	P7_9	P5_1	GCTACGCTTAGATCGC	1X_220527
2	1	GCTACGCT	GTAAGGAG	P7_9	P5_5	GCTACGCTGTAAGGAG	1X_220527
2	3	GCTACGCT	TTTCTAGC	P7_9	P5_13	GCTACGCTTTTCTAGC	1X_220527
2	4	GCTACGCT	GCATTAAG	P7_9	P5_33	GCTACGCTGCATTAAG	1X_220527
2	5	GCTACGCT	GGCACGGA	P7_9	P5_37	GCTACGCTGGCACGGA	1X_220527
2	6	GCTACGCT	CCAGTTTA	P7_9	P5_41	GCTACGCTCCAGTTTA	1X_220527
2	7	GCTACGCT	TCACATGG	P7_9	P5_45	GCTACGCTTCACATGG	1X_220527
2	8	GCTACGCT	ATCGAATG	P7_9	P5_65	GCTACGCTATCGAATG	1X_220527
2	9	GCTACGCT	TTCGTGCA	P7_9	P5_17	GCTACGCTTTCGTGCA	1X_220527
2	10	GCTACGCT	GGTTCAAT	P7_9	P5_21	GCTACGCTGGTTCAAT	1X_220527
2	11	GCTACGCT	AGCCGTTC	P7_9	P5_25	GCTACGCTAGCCGTTC	1X_220527
2	12	GCTACGCT	GACGTGGC	P7_9	P5_29	GCTACGCTGACGTGGC	1X_220527
2	13	GCTACGCT	GAGACGTG	P7_9	P5_49	GCTACGCTGAGACGTG	1X_220527
2	14	GCTACGCT	CGTAGACC	P7_9	P5_53	GCTACGCTCGTAGACC	1X_220527
2	15	GCTACGCT	ACGCGCAG	P7_9	P5_57	GCTACGCTACGCGCAG	1X_220527
2	16	GCTACGCT	CGATAGGG	P7_9	P5_61	GCTACGCTCGATAGGG	1X_220527
2	17	GCTACGCT	CCCTTGGA	P7_9	P5_69	GCTACGCTCCCTTGGA	1X_220527
2	18	GCTACGCT	AGAGTAGA	P7_9	P5_4	GCTACGCTAGAGTAGA	1X_220527
2	19	GCTACGCT	CTAAGCCT	P7_9	P5_8	GCTACGCTCTAAGCCT	1X_220527
2	20	GCTACGCT	GTCGGACT	P7_9	P5_12	GCTACGCTGTCGGACT	1X_220527
2	21	GCTACGCT	TCCATCAA	P7_9	P5_16	GCTACGCTTCCATCAA	1X_220527
2	22	GCTACGCT	TGATTGTT	P7_9	P5_36	GCTACGCTTGATTGTT	1X_220527
2	23	GCTACGCT	CGTACCAA	P7_9	P5_40	GCTACGCTCGTACCAA	1X_220527
2	24	GCTACGCT	CGCCAGAT	P7_9	P5_44	GCTACGCTCGCCAGAT	1X_220527
2	25	GCTACGCT	TAAGTTAC	P7_9	P5_48	GCTACGCTTAAGTTAC	1X_220527
2	26	GCTACGCT	TGGGCGGT	P7_9	P5_68	GCTACGCTTGGGCGGT	1X_220527
2	27	GCTACGCT	CAGCAACG	P7_9	P5_20	GCTACGCTCAGCAACG	1X_220527
2	28	GCTACGCT	CGGACTGC	P7_9	P5_24	GCTACGCTCGGACTGC	1X_220527
2	29	GCTACGCT	GGGCTTGG	P7_9	P5_28	GCTACGCTGGGCTTGG	1X_220527
2	30	GCTACGCT	TCCGAGTT	P7_9	P5_32	GCTACGCTTCCGAGTT	1X_220527
2	31	GCTACGCT	CTTTAACA	P7_9	P5_52	GCTACGCTCTTTAACA	1X_220527
2	32	GCTACGCT	TGTTCCTG	P7_9	P5_56	GCTACGCTTGTTCCTG	1X_220527
2	33	GCTACGCT	TACTGACC	P7_9	P5_60	GCTACGCTTACTGACC	1X_220527
2	34	GCTACGCT	GGTGAAGG	P7_9	P5_64	GCTACGCTGGTGAAGG	1X_220527
2	35	GCTACGCT	ACTTGTTG	P7_9	P5_72	GCTACGCTACTTGTTG	1X_220527
2	36	GCTACGCT	TATCCTCT	P7_9	P5_3	GCTACGCTTATCCTCT	1X_220527
2	37	GCTACGCT	AAGGAGTA	P7_9	P5_7	GCTACGCTAAGGAGTA	1X_220527
2	38	GCTACGCT	TGATGAAA	P7_9	P5_11	GCTACGCTTGATGAAA	1X_220527
2	39	GCTACGCT	GTGTATCG	P7_9	P5_15	GCTACGCTGTGTATCG	1X_220527
2	40	GCTACGCT	CCTGCGGG	P7_9	P5_35	GCTACGCTCCTGCGGG	1X_220527
2	41	GCTACGCT	ATGGTCAT	P7_9	P5_39	GCTACGCTATGGTCAT	1X_220527
2	42	GCTACGCT	CTAGAAGT	P7_9	P5_43	GCTACGCTCTAGAAGT	1X_220527
2	43	GCTACGCT	CCACCGTT	P7_9	P5_47	GCTACGCTCCACCGTT	1X_220527
2	44	GCTACGCT	GCCCACGT	P7_9	P5_67	GCTACGCTGCCCACGT	1X_220527
2	45	GCTACGCT	CCTTATGT	P7_9	P5_19	GCTACGCTCCTTATGT	1X_220527
2	46	GCTACGCT	GATTCCCA	P7_9	P5_23	GCTACGCTGATTCCCA	1X_220527
2	47	GCTACGCT	TGCATACT	P7_9	P5_27	GCTACGCTTGCATACT	1X_220527
2	48	GCTACGCT	GCAGCCTC	P7_9	P5_31	GCTACGCTGCAGCCTC	1X_220527
2	49	GCTACGCT	TTAACTTG	P7_9	P5_51	GCTACGCTTTAACTTG	1X_220527
2	50	GCTACGCT	ATCCAGGA	P7_9	P5_55	GCTACGCTATCCAGGA	1X_220527
2	51	GCTACGCT	AATCTACA	P7_9	P5_59	GCTACGCTAATCTACA	1X_220527
2	52	GCTACGCT	AGAGATCT	P7_9	P5_63	GCTACGCTAGAGATCT	1X_220527
2	53	GCTACGCT	AGTCCGAG	P7_9	P5_71	GCTACGCTAGTCCGAG	1X_220527
2	54	GCTACGCT	CTCTCTAT	P7_9	P5_2	GCTACGCTCTCTCTAT	1X_220527
2	55	GCTACGCT	ACTGCATA	P7_9	P5_6	GCTACGCTACTGCATA	1X_220527
2	56	GCTACGCT	AACATGAT	P7_9	P5_10	GCTACGCTAACATGAT	1X_220527
2	57	GCTACGCT	TAACCAAG	P7_9	P5_14	GCTACGCTTAACCAAG	1X_220527
2	58	GCTACGCT	ACGATAAC	P7_9	P5_34	GCTACGCTACGATAAC	1X_220527
2	59	GCTACGCT	GATCATTC	P7_9	P5_38	GCTACGCTGATCATTC	1X_220527
2	60	GCTACGCT	ACCGGCCC	P7_9	P5_42	GCTACGCTACCGGCCC	1X_220527
2	61	GCTACGCT	GAACTCGA	P7_9	P5_46	GCTACGCTGAACTCGA	1X_220527
2	62	GCTACGCT	TCAAGAGC	P7_9	P5_66	GCTACGCTTCAAGAGC	1X_220527
2	63	GCTACGCT	AGGTTGCC	P7_9	P5_18	GCTACGCTAGGTTGCC	1X_220527
2	64	GCTACGCT	ACATTCGT	P7_9	P5_22	GCTACGCTACATTCGT	1X_220527
2	65	GCTACGCT	ATTGGGTC	P7_9	P5_26	GCTACGCTATTGGGTC	1X_220527
2	66	GCTACGCT	GCAAATTT	P7_9	P5_30	GCTACGCTGCAAATTT	1X_220527
2	67	GCTACGCT	TTGCCTAA	P7_9	P5_50	GCTACGCTTTGCCTAA	1X_220527
2	68	GCTACGCT	TATTTGCG	P7_9	P5_54	GCTACGCTTATTTGCG	1X_220527
2	69	GCTACGCT	TCTGGCGA	P7_9	P5_58	GCTACGCTTCTGGCGA	1X_220527
2	70	GCTACGCT	ACTTAGAA	P7_9	P5_62	GCTACGCTACTTAGAA	1X_220527
2	71	GCTACGCT	ATTACCGT	P7_9	P5_70	GCTACGCTATTACCGT	1X_220527
3	0	TGGATCTG	TAGATCGC	P7_13	P5_1	TGGATCTGTAGATCGC	1X_220527
3	1	TGGATCTG	GTAAGGAG	P7_13	P5_5	TGGATCTGGTAAGGAG	1X_220527
3	2	TGGATCTG	TGGAAATC	P7_13	P5_9	TGGATCTGTGGAAATC	1X_220527
3	3	TGGATCTG	TTTCTAGC	P7_13	P5_13	TGGATCTGTTTCTAGC	1X_220527
3	4	TGGATCTG	GCATTAAG	P7_13	P5_33	TGGATCTGGCATTAAG	1X_220527
3	5	TGGATCTG	GGCACGGA	P7_13	P5_37	TGGATCTGGGCACGGA	1X_220527
3	6	TGGATCTG	CCAGTTTA	P7_13	P5_41	TGGATCTGCCAGTTTA	1X_220527
3	7	TGGATCTG	TCACATGG	P7_13	P5_45	TGGATCTGTCACATGG	1X_220527
3	8	TGGATCTG	ATCGAATG	P7_13	P5_65	TGGATCTGATCGAATG	1X_220527
3	9	TGGATCTG	TTCGTGCA	P7_13	P5_17	TGGATCTGTTCGTGCA	1X_220527
3	10	TGGATCTG	GGTTCAAT	P7_13	P5_21	TGGATCTGGGTTCAAT	1X_220527
3	11	TGGATCTG	AGCCGTTC	P7_13	P5_25	TGGATCTGAGCCGTTC	1X_220527
3	12	TGGATCTG	GACGTGGC	P7_13	P5_29	TGGATCTGGACGTGGC	1X_220527
3	13	TGGATCTG	GAGACGTG	P7_13	P5_49	TGGATCTGGAGACGTG	1X_220527
3	14	TGGATCTG	CGTAGACC	P7_13	P5_53	TGGATCTGCGTAGACC	1X_220527
3	15	TGGATCTG	ACGCGCAG	P7_13	P5_57	TGGATCTGACGCGCAG	1X_220527
3	16	TGGATCTG	CGATAGGG	P7_13	P5_61	TGGATCTGCGATAGGG	1X_220527
3	17	TGGATCTG	CCCTTGGA	P7_13	P5_69	TGGATCTGCCCTTGGA	1X_220527
3	18	TGGATCTG	AGAGTAGA	P7_13	P5_4	TGGATCTGAGAGTAGA	1X_220527
3	19	TGGATCTG	CTAAGCCT	P7_13	P5_8	TGGATCTGCTAAGCCT	1X_220527
3	20	TGGATCTG	GTCGGACT	P7_13	P5_12	TGGATCTGGTCGGACT	1X_220527
3	21	TGGATCTG	TCCATCAA	P7_13	P5_16	TGGATCTGTCCATCAA	1X_220527
3	22	TGGATCTG	TGATTGTT	P7_13	P5_36	TGGATCTGTGATTGTT	1X_220527
3	23	TGGATCTG	CGTACCAA	P7_13	P5_40	TGGATCTGCGTACCAA	1X_220527
3	24	TGGATCTG	CGCCAGAT	P7_13	P5_44	TGGATCTGCGCCAGAT	1X_220527
3	25	TGGATCTG	TAAGTTAC	P7_13	P5_48	TGGATCTGTAAGTTAC	1X_220527
3	26	TGGATCTG	TGGGCGGT	P7_13	P5_68	TGGATCTGTGGGCGGT	1X_220527
3	27	TGGATCTG	CAGCAACG	P7_13	P5_20	TGGATCTGCAGCAACG	1X_220527
3	28	TGGATCTG	CGGACTGC	P7_13	P5_24	TGGATCTGCGGACTGC	1X_220527
3	29	TGGATCTG	GGGCTTGG	P7_13	P5_28	TGGATCTGGGGCTTGG	1X_220527
3	30	TGGATCTG	TCCGAGTT	P7_13	P5_32	TGGATCTGTCCGAGTT	1X_220527
3	31	TGGATCTG	CTTTAACA	P7_13	P5_52	TGGATCTGCTTTAACA	1X_220527
3	32	TGGATCTG	TGTTCCTG	P7_13	P5_56	TGGATCTGTGTTCCTG	1X_220527
3	33	TGGATCTG	TACTGACC	P7_13	P5_60	TGGATCTGTACTGACC	1X_220527
3	34	TGGATCTG	GGTGAAGG	P7_13	P5_64	TGGATCTGGGTGAAGG	1X_220527
3	35	TGGATCTG	ACTTGTTG	P7_13	P5_72	TGGATCTGACTTGTTG	1X_220527
3	36	TGGATCTG	TATCCTCT	P7_13	P5_3	TGGATCTGTATCCTCT	1X_220527
3	37	TGGATCTG	AAGGAGTA	P7_13	P5_7	TGGATCTGAAGGAGTA	1X_220527
3	38	TGGATCTG	TGATGAAA	P7_13	P5_11	TGGATCTGTGATGAAA	1X_220527
3	39	TGGATCTG	GTGTATCG	P7_13	P5_15	TGGATCTGGTGTATCG	1X_220527
3	40	TGGATCTG	CCTGCGGG	P7_13	P5_35	TGGATCTGCCTGCGGG	1X_220527
3	41	TGGATCTG	ATGGTCAT	P7_13	P5_39	TGGATCTGATGGTCAT	1X_220527
3	42	TGGATCTG	CTAGAAGT	P7_13	P5_43	TGGATCTGCTAGAAGT	1X_220527
3	43	TGGATCTG	CCACCGTT	P7_13	P5_47	TGGATCTGCCACCGTT	1X_220527
3	44	TGGATCTG	GCCCACGT	P7_13	P5_67	TGGATCTGGCCCACGT	1X_220527
3	45	TGGATCTG	CCTTATGT	P7_13	P5_19	TGGATCTGCCTTATGT	1X_220527
3	46	TGGATCTG	GATTCCCA	P7_13	P5_23	TGGATCTGGATTCCCA	1X_220527
3	47	TGGATCTG	TGCATACT	P7_13	P5_27	TGGATCTGTGCATACT	1X_220527
3	48	TGGATCTG	GCAGCCTC	P7_13	P5_31	TGGATCTGGCAGCCTC	1X_220527
3	49	TGGATCTG	TTAACTTG	P7_13	P5_51	TGGATCTGTTAACTTG	1X_220527
3	50	TGGATCTG	ATCCAGGA	P7_13	P5_55	TGGATCTGATCCAGGA	1X_220527
3	51	TGGATCTG	AATCTACA	P7_13	P5_59	TGGATCTGAATCTACA	1X_220527
3	52	TGGATCTG	AGAGATCT	P7_13	P5_63	TGGATCTGAGAGATCT	1X_220527
3	53	TGGATCTG	AGTCCGAG	P7_13	P5_71	TGGATCTGAGTCCGAG	1X_220527
3	54	TGGATCTG	CTCTCTAT	P7_13	P5_2	TGGATCTGCTCTCTAT	1X_220527
3	55	TGGATCTG	ACTGCATA	P7_13	P5_6	TGGATCTGACTGCATA	1X_220527
3	56	TGGATCTG	AACATGAT	P7_13	P5_10	TGGATCTGAACATGAT	1X_220527
3	57	TGGATCTG	TAACCAAG	P7_13	P5_14	TGGATCTGTAACCAAG	1X_220527
3	58	TGGATCTG	ACGATAAC	P7_13	P5_34	TGGATCTGACGATAAC	1X_220527
3	59	TGGATCTG	GATCATTC	P7_13	P5_38	TGGATCTGGATCATTC	1X_220527
3	60	TGGATCTG	ACCGGCCC	P7_13	P5_42	TGGATCTGACCGGCCC	1X_220527
3	61	TGGATCTG	GAACTCGA	P7_13	P5_46	TGGATCTGGAACTCGA	1X_220527
3	62	TGGATCTG	TCAAGAGC	P7_13	P5_66	TGGATCTGTCAAGAGC	1X_220527
3	63	TGGATCTG	AGGTTGCC	P7_13	P5_18	TGGATCTGAGGTTGCC	1X_220527
3	64	TGGATCTG	ACATTCGT	P7_13	P5_22	TGGATCTGACATTCGT	1X_220527
3	65	TGGATCTG	ATTGGGTC	P7_13	P5_26	TGGATCTGATTGGGTC	1X_220527
3	66	TGGATCTG	GCAAATTT	P7_13	P5_30	TGGATCTGGCAAATTT	1X_220527
3	67	TGGATCTG	TTGCCTAA	P7_13	P5_50	TGGATCTGTTGCCTAA	1X_220527
3	68	TGGATCTG	TATTTGCG	P7_13	P5_54	TGGATCTGTATTTGCG	1X_220527
3	69	TGGATCTG	TCTGGCGA	P7_13	P5_58	TGGATCTGTCTGGCGA	1X_220527
3	70	TGGATCTG	ACTTAGAA	P7_13	P5_62	TGGATCTGACTTAGAA	1X_220527
3	71	TGGATCTG	ATTACCGT	P7_13	P5_70	TGGATCTGATTACCGT	1X_220527
4	0	GTTAACAG	TAGATCGC	P7_33	P5_1	GTTAACAGTAGATCGC	1X_220527
4	1	GTTAACAG	GTAAGGAG	P7_33	P5_5	GTTAACAGGTAAGGAG	1X_220527
4	3	GTTAACAG	TTTCTAGC	P7_33	P5_13	GTTAACAGTTTCTAGC	1X_220527
4	4	GTTAACAG	GCATTAAG	P7_33	P5_33	GTTAACAGGCATTAAG	1X_220527
4	5	GTTAACAG	GGCACGGA	P7_33	P5_37	GTTAACAGGGCACGGA	1X_220527
4	6	GTTAACAG	CCAGTTTA	P7_33	P5_41	GTTAACAGCCAGTTTA	1X_220527
4	7	GTTAACAG	TCACATGG	P7_33	P5_45	GTTAACAGTCACATGG	1X_220527
4	8	GTTAACAG	ATCGAATG	P7_33	P5_65	GTTAACAGATCGAATG	1X_220527
4	10	GTTAACAG	GGTTCAAT	P7_33	P5_21	GTTAACAGGGTTCAAT	1X_220527
4	11	GTTAACAG	AGCCGTTC	P7_33	P5_25	GTTAACAGAGCCGTTC	1X_220527
4	12	GTTAACAG	GACGTGGC	P7_33	P5_29	GTTAACAGGACGTGGC	1X_220527
4	13	GTTAACAG	GAGACGTG	P7_33	P5_49	GTTAACAGGAGACGTG	1X_220527
4	15	GTTAACAG	ACGCGCAG	P7_33	P5_57	GTTAACAGACGCGCAG	1X_220527
4	16	GTTAACAG	CGATAGGG	P7_33	P5_61	GTTAACAGCGATAGGG	1X_220527
4	17	GTTAACAG	CCCTTGGA	P7_33	P5_69	GTTAACAGCCCTTGGA	1X_220527
4	18	GTTAACAG	AGAGTAGA	P7_33	P5_4	GTTAACAGAGAGTAGA	1X_220527
4	19	GTTAACAG	CTAAGCCT	P7_33	P5_8	GTTAACAGCTAAGCCT	1X_220527
4	20	GTTAACAG	GTCGGACT	P7_33	P5_12	GTTAACAGGTCGGACT	1X_220527
4	22	GTTAACAG	TGATTGTT	P7_33	P5_36	GTTAACAGTGATTGTT	1X_220527
4	23	GTTAACAG	CGTACCAA	P7_33	P5_40	GTTAACAGCGTACCAA	1X_220527
4	24	GTTAACAG	CGCCAGAT	P7_33	P5_44	GTTAACAGCGCCAGAT	1X_220527
4	25	GTTAACAG	TAAGTTAC	P7_33	P5_48	GTTAACAGTAAGTTAC	1X_220527
4	27	GTTAACAG	CAGCAACG	P7_33	P5_20	GTTAACAGCAGCAACG	1X_220527
4	28	GTTAACAG	CGGACTGC	P7_33	P5_24	GTTAACAGCGGACTGC	1X_220527
4	29	GTTAACAG	GGGCTTGG	P7_33	P5_28	GTTAACAGGGGCTTGG	1X_220527
4	30	GTTAACAG	TCCGAGTT	P7_33	P5_32	GTTAACAGTCCGAGTT	1X_220527
4	31	GTTAACAG	CTTTAACA	P7_33	P5_52	GTTAACAGCTTTAACA	1X_220527
4	32	GTTAACAG	TGTTCCTG	P7_33	P5_56	GTTAACAGTGTTCCTG	1X_220527
4	34	GTTAACAG	GGTGAAGG	P7_33	P5_64	GTTAACAGGGTGAAGG	1X_220527
4	35	GTTAACAG	ACTTGTTG	P7_33	P5_72	GTTAACAGACTTGTTG	1X_220527
4	36	GTTAACAG	TATCCTCT	P7_33	P5_3	GTTAACAGTATCCTCT	1X_220527
4	37	GTTAACAG	AAGGAGTA	P7_33	P5_7	GTTAACAGAAGGAGTA	1X_220527
4	39	GTTAACAG	GTGTATCG	P7_33	P5_15	GTTAACAGGTGTATCG	1X_220527
4	40	GTTAACAG	CCTGCGGG	P7_33	P5_35	GTTAACAGCCTGCGGG	1X_220527
4	41	GTTAACAG	ATGGTCAT	P7_33	P5_39	GTTAACAGATGGTCAT	1X_220527
4	42	GTTAACAG	CTAGAAGT	P7_33	P5_43	GTTAACAGCTAGAAGT	1X_220527
4	43	GTTAACAG	CCACCGTT	P7_33	P5_47	GTTAACAGCCACCGTT	1X_220527
4	44	GTTAACAG	GCCCACGT	P7_33	P5_67	GTTAACAGGCCCACGT	1X_220527
4	46	GTTAACAG	GATTCCCA	P7_33	P5_23	GTTAACAGGATTCCCA	1X_220527
4	47	GTTAACAG	TGCATACT	P7_33	P5_27	GTTAACAGTGCATACT	1X_220527
4	48	GTTAACAG	GCAGCCTC	P7_33	P5_31	GTTAACAGGCAGCCTC	1X_220527
4	49	GTTAACAG	TTAACTTG	P7_33	P5_51	GTTAACAGTTAACTTG	1X_220527
4	51	GTTAACAG	AATCTACA	P7_33	P5_59	GTTAACAGAATCTACA	1X_220527
4	52	GTTAACAG	AGAGATCT	P7_33	P5_63	GTTAACAGAGAGATCT	1X_220527
4	53	GTTAACAG	AGTCCGAG	P7_33	P5_71	GTTAACAGAGTCCGAG	1X_220527
4	54	GTTAACAG	CTCTCTAT	P7_33	P5_2	GTTAACAGCTCTCTAT	1X_220527
4	55	GTTAACAG	ACTGCATA	P7_33	P5_6	GTTAACAGACTGCATA	1X_220527
4	56	GTTAACAG	AACATGAT	P7_33	P5_10	GTTAACAGAACATGAT	1X_220527
4	58	GTTAACAG	ACGATAAC	P7_33	P5_34	GTTAACAGACGATAAC	1X_220527
4	59	GTTAACAG	GATCATTC	P7_33	P5_38	GTTAACAGGATCATTC	1X_220527
4	60	GTTAACAG	ACCGGCCC	P7_33	P5_42	GTTAACAGACCGGCCC	1X_220527
4	61	GTTAACAG	GAACTCGA	P7_33	P5_46	GTTAACAGGAACTCGA	1X_220527
4	63	GTTAACAG	AGGTTGCC	P7_33	P5_18	GTTAACAGAGGTTGCC	1X_220527
4	64	GTTAACAG	ACATTCGT	P7_33	P5_22	GTTAACAGACATTCGT	1X_220527
4	65	GTTAACAG	ATTGGGTC	P7_33	P5_26	GTTAACAGATTGGGTC	1X_220527
4	66	GTTAACAG	GCAAATTT	P7_33	P5_30	GTTAACAGGCAAATTT	1X_220527
4	67	GTTAACAG	TTGCCTAA	P7_33	P5_50	GTTAACAGTTGCCTAA	1X_220527
4	68	GTTAACAG	TATTTGCG	P7_33	P5_54	GTTAACAGTATTTGCG	1X_220527
4	70	GTTAACAG	ACTTAGAA	P7_33	P5_62	GTTAACAGACTTAGAA	1X_220527
4	71	GTTAACAG	ATTACCGT	P7_33	P5_70	GTTAACAGATTACCGT	1X_220527
5	1	CAAGAATT	GTAAGGAG	P7_37	P5_5	CAAGAATTGTAAGGAG	1X_220527
5	2	CAAGAATT	TGGAAATC	P7_37	P5_9	CAAGAATTTGGAAATC	1X_220527
5	3	CAAGAATT	TTTCTAGC	P7_37	P5_13	CAAGAATTTTTCTAGC	1X_220527
5	4	CAAGAATT	GCATTAAG	P7_37	P5_33	CAAGAATTGCATTAAG	1X_220527
5	6	CAAGAATT	CCAGTTTA	P7_37	P5_41	CAAGAATTCCAGTTTA	1X_220527
5	7	CAAGAATT	TCACATGG	P7_37	P5_45	CAAGAATTTCACATGG	1X_220527
5	8	CAAGAATT	ATCGAATG	P7_37	P5_65	CAAGAATTATCGAATG	1X_220527
5	9	CAAGAATT	TTCGTGCA	P7_37	P5_17	CAAGAATTTTCGTGCA	1X_220527
5	10	CAAGAATT	GGTTCAAT	P7_37	P5_21	CAAGAATTGGTTCAAT	1X_220527
5	11	CAAGAATT	AGCCGTTC	P7_37	P5_25	CAAGAATTAGCCGTTC	1X_220527
5	12	CAAGAATT	GACGTGGC	P7_37	P5_29	CAAGAATTGACGTGGC	1X_220527
5	13	CAAGAATT	GAGACGTG	P7_37	P5_49	CAAGAATTGAGACGTG	1X_220527
5	14	CAAGAATT	CGTAGACC	P7_37	P5_53	CAAGAATTCGTAGACC	1X_220527
5	15	CAAGAATT	ACGCGCAG	P7_37	P5_57	CAAGAATTACGCGCAG	1X_220527
5	16	CAAGAATT	CGATAGGG	P7_37	P5_61	CAAGAATTCGATAGGG	1X_220527
5	17	CAAGAATT	CCCTTGGA	P7_37	P5_69	CAAGAATTCCCTTGGA	1X_220527
5	18	CAAGAATT	AGAGTAGA	P7_37	P5_4	CAAGAATTAGAGTAGA	1X_220527
5	19	CAAGAATT	CTAAGCCT	P7_37	P5_8	CAAGAATTCTAAGCCT	1X_220527
5	20	CAAGAATT	GTCGGACT	P7_37	P5_12	CAAGAATTGTCGGACT	1X_220527
5	21	CAAGAATT	TCCATCAA	P7_37	P5_16	CAAGAATTTCCATCAA	1X_220527
5	22	CAAGAATT	TGATTGTT	P7_37	P5_36	CAAGAATTTGATTGTT	1X_220527
5	23	CAAGAATT	CGTACCAA	P7_37	P5_40	CAAGAATTCGTACCAA	1X_220527
5	24	CAAGAATT	CGCCAGAT	P7_37	P5_44	CAAGAATTCGCCAGAT	1X_220527
5	25	CAAGAATT	TAAGTTAC	P7_37	P5_48	CAAGAATTTAAGTTAC	1X_220527
5	26	CAAGAATT	TGGGCGGT	P7_37	P5_68	CAAGAATTTGGGCGGT	1X_220527
5	27	CAAGAATT	CAGCAACG	P7_37	P5_20	CAAGAATTCAGCAACG	1X_220527
5	28	CAAGAATT	CGGACTGC	P7_37	P5_24	CAAGAATTCGGACTGC	1X_220527
5	29	CAAGAATT	GGGCTTGG	P7_37	P5_28	CAAGAATTGGGCTTGG	1X_220527
5	30	CAAGAATT	TCCGAGTT	P7_37	P5_32	CAAGAATTTCCGAGTT	1X_220527
5	31	CAAGAATT	CTTTAACA	P7_37	P5_52	CAAGAATTCTTTAACA	1X_220527
5	32	CAAGAATT	TGTTCCTG	P7_37	P5_56	CAAGAATTTGTTCCTG	1X_220527
5	33	CAAGAATT	TACTGACC	P7_37	P5_60	CAAGAATTTACTGACC	1X_220527
5	34	CAAGAATT	GGTGAAGG	P7_37	P5_64	CAAGAATTGGTGAAGG	1X_220527
5	35	CAAGAATT	ACTTGTTG	P7_37	P5_72	CAAGAATTACTTGTTG	1X_220527
5	36	CAAGAATT	TATCCTCT	P7_37	P5_3	CAAGAATTTATCCTCT	1X_220527
5	37	CAAGAATT	AAGGAGTA	P7_37	P5_7	CAAGAATTAAGGAGTA	1X_220527
5	38	CAAGAATT	TGATGAAA	P7_37	P5_11	CAAGAATTTGATGAAA	1X_220527
5	39	CAAGAATT	GTGTATCG	P7_37	P5_15	CAAGAATTGTGTATCG	1X_220527
5	40	CAAGAATT	CCTGCGGG	P7_37	P5_35	CAAGAATTCCTGCGGG	1X_220527
5	41	CAAGAATT	ATGGTCAT	P7_37	P5_39	CAAGAATTATGGTCAT	1X_220527
5	42	CAAGAATT	CTAGAAGT	P7_37	P5_43	CAAGAATTCTAGAAGT	1X_220527
5	43	CAAGAATT	CCACCGTT	P7_37	P5_47	CAAGAATTCCACCGTT	1X_220527
5	44	CAAGAATT	GCCCACGT	P7_37	P5_67	CAAGAATTGCCCACGT	1X_220527
5	45	CAAGAATT	CCTTATGT	P7_37	P5_19	CAAGAATTCCTTATGT	1X_220527
5	46	CAAGAATT	GATTCCCA	P7_37	P5_23	CAAGAATTGATTCCCA	1X_220527
5	47	CAAGAATT	TGCATACT	P7_37	P5_27	CAAGAATTTGCATACT	1X_220527
5	48	CAAGAATT	GCAGCCTC	P7_37	P5_31	CAAGAATTGCAGCCTC	1X_220527
5	49	CAAGAATT	TTAACTTG	P7_37	P5_51	CAAGAATTTTAACTTG	1X_220527
5	50	CAAGAATT	ATCCAGGA	P7_37	P5_55	CAAGAATTATCCAGGA	1X_220527
5	51	CAAGAATT	AATCTACA	P7_37	P5_59	CAAGAATTAATCTACA	1X_220527
5	52	CAAGAATT	AGAGATCT	P7_37	P5_63	CAAGAATTAGAGATCT	1X_220527
5	53	CAAGAATT	AGTCCGAG	P7_37	P5_71	CAAGAATTAGTCCGAG	1X_220527
5	54	CAAGAATT	CTCTCTAT	P7_37	P5_2	CAAGAATTCTCTCTAT	1X_220527
5	55	CAAGAATT	ACTGCATA	P7_37	P5_6	CAAGAATTACTGCATA	1X_220527
5	56	CAAGAATT	AACATGAT	P7_37	P5_10	CAAGAATTAACATGAT	1X_220527
5	57	CAAGAATT	TAACCAAG	P7_37	P5_14	CAAGAATTTAACCAAG	1X_220527
5	58	CAAGAATT	ACGATAAC	P7_37	P5_34	CAAGAATTACGATAAC	1X_220527
5	59	CAAGAATT	GATCATTC	P7_37	P5_38	CAAGAATTGATCATTC	1X_220527
5	60	CAAGAATT	ACCGGCCC	P7_37	P5_42	CAAGAATTACCGGCCC	1X_220527
5	61	CAAGAATT	GAACTCGA	P7_37	P5_46	CAAGAATTGAACTCGA	1X_220527
5	62	CAAGAATT	TCAAGAGC	P7_37	P5_66	CAAGAATTTCAAGAGC	1X_220527
5	63	CAAGAATT	AGGTTGCC	P7_37	P5_18	CAAGAATTAGGTTGCC	1X_220527
5	64	CAAGAATT	ACATTCGT	P7_37	P5_22	CAAGAATTACATTCGT	1X_220527
5	65	CAAGAATT	ATTGGGTC	P7_37	P5_26	CAAGAATTATTGGGTC	1X_220527
5	67	CAAGAATT	TTGCCTAA	P7_37	P5_50	CAAGAATTTTGCCTAA	1X_220527
5	68	CAAGAATT	TATTTGCG	P7_37	P5_54	CAAGAATTTATTTGCG	1X_220527
5	69	CAAGAATT	TCTGGCGA	P7_37	P5_58	CAAGAATTTCTGGCGA	1X_220527
5	70	CAAGAATT	ACTTAGAA	P7_37	P5_62	CAAGAATTACTTAGAA	1X_220527
6	0	TACACCTC	TAGATCGC	P7_41	P5_1	TACACCTCTAGATCGC	1X_220527
6	1	TACACCTC	GTAAGGAG	P7_41	P5_5	TACACCTCGTAAGGAG	1X_220527
6	2	TACACCTC	TGGAAATC	P7_41	P5_9	TACACCTCTGGAAATC	1X_220527
6	3	TACACCTC	TTTCTAGC	P7_41	P5_13	TACACCTCTTTCTAGC	1X_220527
6	4	TACACCTC	GCATTAAG	P7_41	P5_33	TACACCTCGCATTAAG	1X_220527
6	5	TACACCTC	GGCACGGA	P7_41	P5_37	TACACCTCGGCACGGA	1X_220527
6	6	TACACCTC	CCAGTTTA	P7_41	P5_41	TACACCTCCCAGTTTA	1X_220527
6	7	TACACCTC	TCACATGG	P7_41	P5_45	TACACCTCTCACATGG	1X_220527
6	8	TACACCTC	ATCGAATG	P7_41	P5_65	TACACCTCATCGAATG	1X_220527
6	9	TACACCTC	TTCGTGCA	P7_41	P5_17	TACACCTCTTCGTGCA	1X_220527
6	10	TACACCTC	GGTTCAAT	P7_41	P5_21	TACACCTCGGTTCAAT	1X_220527
6	11	TACACCTC	AGCCGTTC	P7_41	P5_25	TACACCTCAGCCGTTC	1X_220527
6	12	TACACCTC	GACGTGGC	P7_41	P5_29	TACACCTCGACGTGGC	1X_220527
6	13	TACACCTC	GAGACGTG	P7_41	P5_49	TACACCTCGAGACGTG	1X_220527
6	14	TACACCTC	CGTAGACC	P7_41	P5_53	TACACCTCCGTAGACC	1X_220527
6	15	TACACCTC	ACGCGCAG	P7_41	P5_57	TACACCTCACGCGCAG	1X_220527
6	16	TACACCTC	CGATAGGG	P7_41	P5_61	TACACCTCCGATAGGG	1X_220527
6	17	TACACCTC	CCCTTGGA	P7_41	P5_69	TACACCTCCCCTTGGA	1X_220527
6	18	TACACCTC	AGAGTAGA	P7_41	P5_4	TACACCTCAGAGTAGA	1X_220527
6	19	TACACCTC	CTAAGCCT	P7_41	P5_8	TACACCTCCTAAGCCT	1X_220527
6	20	TACACCTC	GTCGGACT	P7_41	P5_12	TACACCTCGTCGGACT	1X_220527
6	21	TACACCTC	TCCATCAA	P7_41	P5_16	TACACCTCTCCATCAA	1X_220527
6	22	TACACCTC	TGATTGTT	P7_41	P5_36	TACACCTCTGATTGTT	1X_220527
6	23	TACACCTC	CGTACCAA	P7_41	P5_40	TACACCTCCGTACCAA	1X_220527
6	24	TACACCTC	CGCCAGAT	P7_41	P5_44	TACACCTCCGCCAGAT	1X_220527
6	25	TACACCTC	TAAGTTAC	P7_41	P5_48	TACACCTCTAAGTTAC	1X_220527
6	26	TACACCTC	TGGGCGGT	P7_41	P5_68	TACACCTCTGGGCGGT	1X_220527
6	27	TACACCTC	CAGCAACG	P7_41	P5_20	TACACCTCCAGCAACG	1X_220527
6	28	TACACCTC	CGGACTGC	P7_41	P5_24	TACACCTCCGGACTGC	1X_220527
6	29	TACACCTC	GGGCTTGG	P7_41	P5_28	TACACCTCGGGCTTGG	1X_220527
6	30	TACACCTC	TCCGAGTT	P7_41	P5_32	TACACCTCTCCGAGTT	1X_220527
6	31	TACACCTC	CTTTAACA	P7_41	P5_52	TACACCTCCTTTAACA	1X_220527
6	32	TACACCTC	TGTTCCTG	P7_41	P5_56	TACACCTCTGTTCCTG	1X_220527
6	33	TACACCTC	TACTGACC	P7_41	P5_60	TACACCTCTACTGACC	1X_220527
6	34	TACACCTC	GGTGAAGG	P7_41	P5_64	TACACCTCGGTGAAGG	1X_220527
6	35	TACACCTC	ACTTGTTG	P7_41	P5_72	TACACCTCACTTGTTG	1X_220527
6	36	TACACCTC	TATCCTCT	P7_41	P5_3	TACACCTCTATCCTCT	1X_220527
6	37	TACACCTC	AAGGAGTA	P7_41	P5_7	TACACCTCAAGGAGTA	1X_220527
6	38	TACACCTC	TGATGAAA	P7_41	P5_11	TACACCTCTGATGAAA	1X_220527
6	39	TACACCTC	GTGTATCG	P7_41	P5_15	TACACCTCGTGTATCG	1X_220527
6	40	TACACCTC	CCTGCGGG	P7_41	P5_35	TACACCTCCCTGCGGG	1X_220527
6	41	TACACCTC	ATGGTCAT	P7_41	P5_39	TACACCTCATGGTCAT	1X_220527
6	42	TACACCTC	CTAGAAGT	P7_41	P5_43	TACACCTCCTAGAAGT	1X_220527
6	43	TACACCTC	CCACCGTT	P7_41	P5_47	TACACCTCCCACCGTT	1X_220527
6	44	TACACCTC	GCCCACGT	P7_41	P5_67	TACACCTCGCCCACGT	1X_220527
6	45	TACACCTC	CCTTATGT	P7_41	P5_19	TACACCTCCCTTATGT	1X_220527
6	46	TACACCTC	GATTCCCA	P7_41	P5_23	TACACCTCGATTCCCA	1X_220527
6	47	TACACCTC	TGCATACT	P7_41	P5_27	TACACCTCTGCATACT	1X_220527
6	48	TACACCTC	GCAGCCTC	P7_41	P5_31	TACACCTCGCAGCCTC	1X_220527
6	49	TACACCTC	TTAACTTG	P7_41	P5_51	TACACCTCTTAACTTG	1X_220527
6	50	TACACCTC	ATCCAGGA	P7_41	P5_55	TACACCTCATCCAGGA	1X_220527
6	51	TACACCTC	AATCTACA	P7_41	P5_59	TACACCTCAATCTACA	1X_220527
6	52	TACACCTC	AGAGATCT	P7_41	P5_63	TACACCTCAGAGATCT	1X_220527
6	53	TACACCTC	AGTCCGAG	P7_41	P5_71	TACACCTCAGTCCGAG	1X_220527
6	54	TACACCTC	CTCTCTAT	P7_41	P5_2	TACACCTCCTCTCTAT	1X_220527
6	55	TACACCTC	ACTGCATA	P7_41	P5_6	TACACCTCACTGCATA	1X_220527
6	56	TACACCTC	AACATGAT	P7_41	P5_10	TACACCTCAACATGAT	1X_220527
6	57	TACACCTC	TAACCAAG	P7_41	P5_14	TACACCTCTAACCAAG	1X_220527
6	58	TACACCTC	ACGATAAC	P7_41	P5_34	TACACCTCACGATAAC	1X_220527
6	59	TACACCTC	GATCATTC	P7_41	P5_38	TACACCTCGATCATTC	1X_220527
6	60	TACACCTC	ACCGGCCC	P7_41	P5_42	TACACCTCACCGGCCC	1X_220527
6	61	TACACCTC	GAACTCGA	P7_41	P5_46	TACACCTCGAACTCGA	1X_220527
6	62	TACACCTC	TCAAGAGC	P7_41	P5_66	TACACCTCTCAAGAGC	1X_220527
6	63	TACACCTC	AGGTTGCC	P7_41	P5_18	TACACCTCAGGTTGCC	1X_220527
6	64	TACACCTC	ACATTCGT	P7_41	P5_22	TACACCTCACATTCGT	1X_220527
6	65	TACACCTC	ATTGGGTC	P7_41	P5_26	TACACCTCATTGGGTC	1X_220527
6	66	TACACCTC	GCAAATTT	P7_41	P5_30	TACACCTCGCAAATTT	1X_220527
6	67	TACACCTC	TTGCCTAA	P7_41	P5_50	TACACCTCTTGCCTAA	1X_220527
6	68	TACACCTC	TATTTGCG	P7_41	P5_54	TACACCTCTATTTGCG	1X_220527
6	69	TACACCTC	TCTGGCGA	P7_41	P5_58	TACACCTCTCTGGCGA	1X_220527
6	70	TACACCTC	ACTTAGAA	P7_41	P5_62	TACACCTCACTTAGAA	1X_220527
6	71	TACACCTC	ATTACCGT	P7_41	P5_70	TACACCTCATTACCGT	1X_220527
7	0	TCTTATTA	TAGATCGC	P7_45	P5_1	TCTTATTATAGATCGC	1X_220527
7	1	TCTTATTA	GTAAGGAG	P7_45	P5_5	TCTTATTAGTAAGGAG	1X_220527
7	2	TCTTATTA	TGGAAATC	P7_45	P5_9	TCTTATTATGGAAATC	1X_220527
7	3	TCTTATTA	TTTCTAGC	P7_45	P5_13	TCTTATTATTTCTAGC	1X_220527
7	4	TCTTATTA	GCATTAAG	P7_45	P5_33	TCTTATTAGCATTAAG	1X_220527
7	5	TCTTATTA	GGCACGGA	P7_45	P5_37	TCTTATTAGGCACGGA	1X_220527
7	6	TCTTATTA	CCAGTTTA	P7_45	P5_41	TCTTATTACCAGTTTA	1X_220527
7	7	TCTTATTA	TCACATGG	P7_45	P5_45	TCTTATTATCACATGG	1X_220527
7	8	TCTTATTA	ATCGAATG	P7_45	P5_65	TCTTATTAATCGAATG	1X_220527
7	9	TCTTATTA	TTCGTGCA	P7_45	P5_17	TCTTATTATTCGTGCA	1X_220527
7	10	TCTTATTA	GGTTCAAT	P7_45	P5_21	TCTTATTAGGTTCAAT	1X_220527
7	11	TCTTATTA	AGCCGTTC	P7_45	P5_25	TCTTATTAAGCCGTTC	1X_220527
7	12	TCTTATTA	GACGTGGC	P7_45	P5_29	TCTTATTAGACGTGGC	1X_220527
7	13	TCTTATTA	GAGACGTG	P7_45	P5_49	TCTTATTAGAGACGTG	1X_220527
7	14	TCTTATTA	CGTAGACC	P7_45	P5_53	TCTTATTACGTAGACC	1X_220527
7	15	TCTTATTA	ACGCGCAG	P7_45	P5_57	TCTTATTAACGCGCAG	1X_220527
7	16	TCTTATTA	CGATAGGG	P7_45	P5_61	TCTTATTACGATAGGG	1X_220527
7	17	TCTTATTA	CCCTTGGA	P7_45	P5_69	TCTTATTACCCTTGGA	1X_220527
7	18	TCTTATTA	AGAGTAGA	P7_45	P5_4	TCTTATTAAGAGTAGA	1X_220527
7	19	TCTTATTA	CTAAGCCT	P7_45	P5_8	TCTTATTACTAAGCCT	1X_220527
7	20	TCTTATTA	GTCGGACT	P7_45	P5_12	TCTTATTAGTCGGACT	1X_220527
7	21	TCTTATTA	TCCATCAA	P7_45	P5_16	TCTTATTATCCATCAA	1X_220527
7	22	TCTTATTA	TGATTGTT	P7_45	P5_36	TCTTATTATGATTGTT	1X_220527
7	23	TCTTATTA	CGTACCAA	P7_45	P5_40	TCTTATTACGTACCAA	1X_220527
7	24	TCTTATTA	CGCCAGAT	P7_45	P5_44	TCTTATTACGCCAGAT	1X_220527
7	25	TCTTATTA	TAAGTTAC	P7_45	P5_48	TCTTATTATAAGTTAC	1X_220527
7	26	TCTTATTA	TGGGCGGT	P7_45	P5_68	TCTTATTATGGGCGGT	1X_220527
7	27	TCTTATTA	CAGCAACG	P7_45	P5_20	TCTTATTACAGCAACG	1X_220527
7	28	TCTTATTA	CGGACTGC	P7_45	P5_24	TCTTATTACGGACTGC	1X_220527
7	29	TCTTATTA	GGGCTTGG	P7_45	P5_28	TCTTATTAGGGCTTGG	1X_220527
7	30	TCTTATTA	TCCGAGTT	P7_45	P5_32	TCTTATTATCCGAGTT	1X_220527
7	31	TCTTATTA	CTTTAACA	P7_45	P5_52	TCTTATTACTTTAACA	1X_220527
7	32	TCTTATTA	TGTTCCTG	P7_45	P5_56	TCTTATTATGTTCCTG	1X_220527
7	33	TCTTATTA	TACTGACC	P7_45	P5_60	TCTTATTATACTGACC	1X_220527
7	34	TCTTATTA	GGTGAAGG	P7_45	P5_64	TCTTATTAGGTGAAGG	1X_220527
7	35	TCTTATTA	ACTTGTTG	P7_45	P5_72	TCTTATTAACTTGTTG	1X_220527
7	36	TCTTATTA	TATCCTCT	P7_45	P5_3	TCTTATTATATCCTCT	1X_220527
7	37	TCTTATTA	AAGGAGTA	P7_45	P5_7	TCTTATTAAAGGAGTA	1X_220527
7	38	TCTTATTA	TGATGAAA	P7_45	P5_11	TCTTATTATGATGAAA	1X_220527
7	39	TCTTATTA	GTGTATCG	P7_45	P5_15	TCTTATTAGTGTATCG	1X_220527
7	40	TCTTATTA	CCTGCGGG	P7_45	P5_35	TCTTATTACCTGCGGG	1X_220527
7	41	TCTTATTA	ATGGTCAT	P7_45	P5_39	TCTTATTAATGGTCAT	1X_220527
7	42	TCTTATTA	CTAGAAGT	P7_45	P5_43	TCTTATTACTAGAAGT	1X_220527
7	43	TCTTATTA	CCACCGTT	P7_45	P5_47	TCTTATTACCACCGTT	1X_220527
7	44	TCTTATTA	GCCCACGT	P7_45	P5_67	TCTTATTAGCCCACGT	1X_220527
7	45	TCTTATTA	CCTTATGT	P7_45	P5_19	TCTTATTACCTTATGT	1X_220527
7	46	TCTTATTA	GATTCCCA	P7_45	P5_23	TCTTATTAGATTCCCA	1X_220527
7	47	TCTTATTA	TGCATACT	P7_45	P5_27	TCTTATTATGCATACT	1X_220527
7	48	TCTTATTA	GCAGCCTC	P7_45	P5_31	TCTTATTAGCAGCCTC	1X_220527
7	49	TCTTATTA	TTAACTTG	P7_45	P5_51	TCTTATTATTAACTTG	1X_220527
7	50	TCTTATTA	ATCCAGGA	P7_45	P5_55	TCTTATTAATCCAGGA	1X_220527
7	51	TCTTATTA	AATCTACA	P7_45	P5_59	TCTTATTAAATCTACA	1X_220527
7	52	TCTTATTA	AGAGATCT	P7_45	P5_63	TCTTATTAAGAGATCT	1X_220527
7	53	TCTTATTA	AGTCCGAG	P7_45	P5_71	TCTTATTAAGTCCGAG	1X_220527
7	54	TCTTATTA	CTCTCTAT	P7_45	P5_2	TCTTATTACTCTCTAT	1X_220527
7	55	TCTTATTA	ACTGCATA	P7_45	P5_6	TCTTATTAACTGCATA	1X_220527
7	56	TCTTATTA	AACATGAT	P7_45	P5_10	TCTTATTAAACATGAT	1X_220527
7	57	TCTTATTA	TAACCAAG	P7_45	P5_14	TCTTATTATAACCAAG	1X_220527
7	58	TCTTATTA	ACGATAAC	P7_45	P5_34	TCTTATTAACGATAAC	1X_220527
7	59	TCTTATTA	GATCATTC	P7_45	P5_38	TCTTATTAGATCATTC	1X_220527
7	60	TCTTATTA	ACCGGCCC	P7_45	P5_42	TCTTATTAACCGGCCC	1X_220527
7	61	TCTTATTA	GAACTCGA	P7_45	P5_46	TCTTATTAGAACTCGA	1X_220527
7	62	TCTTATTA	TCAAGAGC	P7_45	P5_66	TCTTATTATCAAGAGC	1X_220527
7	63	TCTTATTA	AGGTTGCC	P7_45	P5_18	TCTTATTAAGGTTGCC	1X_220527
7	64	TCTTATTA	ACATTCGT	P7_45	P5_22	TCTTATTAACATTCGT	1X_220527
7	65	TCTTATTA	ATTGGGTC	P7_45	P5_26	TCTTATTAATTGGGTC	1X_220527
7	66	TCTTATTA	GCAAATTT	P7_45	P5_30	TCTTATTAGCAAATTT	1X_220527
7	67	TCTTATTA	TTGCCTAA	P7_45	P5_50	TCTTATTATTGCCTAA	1X_220527
7	68	TCTTATTA	TATTTGCG	P7_45	P5_54	TCTTATTATATTTGCG	1X_220527
7	69	TCTTATTA	TCTGGCGA	P7_45	P5_58	TCTTATTATCTGGCGA	1X_220527
7	70	TCTTATTA	ACTTAGAA	P7_45	P5_62	TCTTATTAACTTAGAA	1X_220527
7	71	TCTTATTA	ATTACCGT	P7_45	P5_70	TCTTATTAATTACCGT	1X_220527
8	0	TAACAACA	TAGATCGC	P7_65	P5_1	TAACAACATAGATCGC	1X_220527
8	1	TAACAACA	GTAAGGAG	P7_65	P5_5	TAACAACAGTAAGGAG	1X_220527
8	2	TAACAACA	TGGAAATC	P7_65	P5_9	TAACAACATGGAAATC	1X_220527
8	3	TAACAACA	TTTCTAGC	P7_65	P5_13	TAACAACATTTCTAGC	1X_220527
8	4	TAACAACA	GCATTAAG	P7_65	P5_33	TAACAACAGCATTAAG	1X_220527
8	5	TAACAACA	GGCACGGA	P7_65	P5_37	TAACAACAGGCACGGA	1X_220527
8	6	TAACAACA	CCAGTTTA	P7_65	P5_41	TAACAACACCAGTTTA	1X_220527
8	7	TAACAACA	TCACATGG	P7_65	P5_45	TAACAACATCACATGG	1X_220527
8	8	TAACAACA	ATCGAATG	P7_65	P5_65	TAACAACAATCGAATG	1X_220527
8	9	TAACAACA	TTCGTGCA	P7_65	P5_17	TAACAACATTCGTGCA	1X_220527
8	10	TAACAACA	GGTTCAAT	P7_65	P5_21	TAACAACAGGTTCAAT	1X_220527
8	11	TAACAACA	AGCCGTTC	P7_65	P5_25	TAACAACAAGCCGTTC	1X_220527
8	12	TAACAACA	GACGTGGC	P7_65	P5_29	TAACAACAGACGTGGC	1X_220527
8	13	TAACAACA	GAGACGTG	P7_65	P5_49	TAACAACAGAGACGTG	1X_220527
8	14	TAACAACA	CGTAGACC	P7_65	P5_53	TAACAACACGTAGACC	1X_220527
8	15	TAACAACA	ACGCGCAG	P7_65	P5_57	TAACAACAACGCGCAG	1X_220527
8	16	TAACAACA	CGATAGGG	P7_65	P5_61	TAACAACACGATAGGG	1X_220527
8	17	TAACAACA	CCCTTGGA	P7_65	P5_69	TAACAACACCCTTGGA	1X_220527
8	18	TAACAACA	AGAGTAGA	P7_65	P5_4	TAACAACAAGAGTAGA	1X_220527
8	19	TAACAACA	CTAAGCCT	P7_65	P5_8	TAACAACACTAAGCCT	1X_220527
8	20	TAACAACA	GTCGGACT	P7_65	P5_12	TAACAACAGTCGGACT	1X_220527
8	21	TAACAACA	TCCATCAA	P7_65	P5_16	TAACAACATCCATCAA	1X_220527
8	22	TAACAACA	TGATTGTT	P7_65	P5_36	TAACAACATGATTGTT	1X_220527
8	23	TAACAACA	CGTACCAA	P7_65	P5_40	TAACAACACGTACCAA	1X_220527
8	24	TAACAACA	CGCCAGAT	P7_65	P5_44	TAACAACACGCCAGAT	1X_220527
8	25	TAACAACA	TAAGTTAC	P7_65	P5_48	TAACAACATAAGTTAC	1X_220527
8	26	TAACAACA	TGGGCGGT	P7_65	P5_68	TAACAACATGGGCGGT	1X_220527
8	27	TAACAACA	CAGCAACG	P7_65	P5_20	TAACAACACAGCAACG	1X_220527
8	28	TAACAACA	CGGACTGC	P7_65	P5_24	TAACAACACGGACTGC	1X_220527
8	29	TAACAACA	GGGCTTGG	P7_65	P5_28	TAACAACAGGGCTTGG	1X_220527
8	30	TAACAACA	TCCGAGTT	P7_65	P5_32	TAACAACATCCGAGTT	1X_220527
8	31	TAACAACA	CTTTAACA	P7_65	P5_52	TAACAACACTTTAACA	1X_220527
8	32	TAACAACA	TGTTCCTG	P7_65	P5_56	TAACAACATGTTCCTG	1X_220527
8	33	TAACAACA	TACTGACC	P7_65	P5_60	TAACAACATACTGACC	1X_220527
8	34	TAACAACA	GGTGAAGG	P7_65	P5_64	TAACAACAGGTGAAGG	1X_220527
8	35	TAACAACA	ACTTGTTG	P7_65	P5_72	TAACAACAACTTGTTG	1X_220527
8	36	TAACAACA	TATCCTCT	P7_65	P5_3	TAACAACATATCCTCT	1X_220527
8	37	TAACAACA	AAGGAGTA	P7_65	P5_7	TAACAACAAAGGAGTA	1X_220527
8	38	TAACAACA	TGATGAAA	P7_65	P5_11	TAACAACATGATGAAA	1X_220527
8	39	TAACAACA	GTGTATCG	P7_65	P5_15	TAACAACAGTGTATCG	1X_220527
8	40	TAACAACA	CCTGCGGG	P7_65	P5_35	TAACAACACCTGCGGG	1X_220527
8	41	TAACAACA	ATGGTCAT	P7_65	P5_39	TAACAACAATGGTCAT	1X_220527
8	42	TAACAACA	CTAGAAGT	P7_65	P5_43	TAACAACACTAGAAGT	1X_220527
8	43	TAACAACA	CCACCGTT	P7_65	P5_47	TAACAACACCACCGTT	1X_220527
8	44	TAACAACA	GCCCACGT	P7_65	P5_67	TAACAACAGCCCACGT	1X_220527
8	45	TAACAACA	CCTTATGT	P7_65	P5_19	TAACAACACCTTATGT	1X_220527
8	46	TAACAACA	GATTCCCA	P7_65	P5_23	TAACAACAGATTCCCA	1X_220527
8	47	TAACAACA	TGCATACT	P7_65	P5_27	TAACAACATGCATACT	1X_220527
8	48	TAACAACA	GCAGCCTC	P7_65	P5_31	TAACAACAGCAGCCTC	1X_220527
8	49	TAACAACA	TTAACTTG	P7_65	P5_51	TAACAACATTAACTTG	1X_220527
8	50	TAACAACA	ATCCAGGA	P7_65	P5_55	TAACAACAATCCAGGA	1X_220527
8	51	TAACAACA	AATCTACA	P7_65	P5_59	TAACAACAAATCTACA	1X_220527
8	52	TAACAACA	AGAGATCT	P7_65	P5_63	TAACAACAAGAGATCT	1X_220527
8	53	TAACAACA	AGTCCGAG	P7_65	P5_71	TAACAACAAGTCCGAG	1X_220527
8	54	TAACAACA	CTCTCTAT	P7_65	P5_2	TAACAACACTCTCTAT	1X_220527
8	55	TAACAACA	ACTGCATA	P7_65	P5_6	TAACAACAACTGCATA	1X_220527
8	56	TAACAACA	AACATGAT	P7_65	P5_10	TAACAACAAACATGAT	1X_220527
8	57	TAACAACA	TAACCAAG	P7_65	P5_14	TAACAACATAACCAAG	1X_220527
8	58	TAACAACA	ACGATAAC	P7_65	P5_34	TAACAACAACGATAAC	1X_220527
8	59	TAACAACA	GATCATTC	P7_65	P5_38	TAACAACAGATCATTC	1X_220527
8	60	TAACAACA	ACCGGCCC	P7_65	P5_42	TAACAACAACCGGCCC	1X_220527
8	61	TAACAACA	GAACTCGA	P7_65	P5_46	TAACAACAGAACTCGA	1X_220527
8	62	TAACAACA	TCAAGAGC	P7_65	P5_66	TAACAACATCAAGAGC	1X_220527
8	63	TAACAACA	AGGTTGCC	P7_65	P5_18	TAACAACAAGGTTGCC	1X_220527
8	64	TAACAACA	ACATTCGT	P7_65	P5_22	TAACAACAACATTCGT	1X_220527
8	65	TAACAACA	ATTGGGTC	P7_65	P5_26	TAACAACAATTGGGTC	1X_220527
8	66	TAACAACA	GCAAATTT	P7_65	P5_30	TAACAACAGCAAATTT	1X_220527
8	67	TAACAACA	TTGCCTAA	P7_65	P5_50	TAACAACATTGCCTAA	1X_220527
8	68	TAACAACA	TATTTGCG	P7_65	P5_54	TAACAACATATTTGCG	1X_220527
8	69	TAACAACA	TCTGGCGA	P7_65	P5_58	TAACAACATCTGGCGA	1X_220527
8	70	TAACAACA	ACTTAGAA	P7_65	P5_62	TAACAACAACTTAGAA	1X_220527
8	71	TAACAACA	ATTACCGT	P7_65	P5_70	TAACAACAATTACCGT	1X_220527
9	0	CGTACTAG	CTCTCTAT	P7_2	P5_2	CGTACTAGCTCTCTAT	0.5X_220527
9	1	CGTACTAG	ACTGCATA	P7_2	P5_6	CGTACTAGACTGCATA	0.5X_220527
9	2	CGTACTAG	AACATGAT	P7_2	P5_10	CGTACTAGAACATGAT	0.5X_220527
9	3	CGTACTAG	TAACCAAG	P7_2	P5_14	CGTACTAGTAACCAAG	0.5X_220527
9	4	CGTACTAG	ACGATAAC	P7_2	P5_34	CGTACTAGACGATAAC	0.5X_220527
9	5	CGTACTAG	GATCATTC	P7_2	P5_38	CGTACTAGGATCATTC	0.5X_220527
9	6	CGTACTAG	ACCGGCCC	P7_2	P5_42	CGTACTAGACCGGCCC	0.5X_220527
9	7	CGTACTAG	GAACTCGA	P7_2	P5_46	CGTACTAGGAACTCGA	0.5X_220527
9	8	CGTACTAG	TCAAGAGC	P7_2	P5_66	CGTACTAGTCAAGAGC	0.5X_220527
9	9	CGTACTAG	AGGTTGCC	P7_2	P5_18	CGTACTAGAGGTTGCC	0.5X_220527
9	10	CGTACTAG	ACATTCGT	P7_2	P5_22	CGTACTAGACATTCGT	0.5X_220527
9	11	CGTACTAG	ATTGGGTC	P7_2	P5_26	CGTACTAGATTGGGTC	0.5X_220527
9	12	CGTACTAG	GCAAATTT	P7_2	P5_30	CGTACTAGGCAAATTT	0.5X_220527
9	13	CGTACTAG	TTGCCTAA	P7_2	P5_50	CGTACTAGTTGCCTAA	0.5X_220527
9	14	CGTACTAG	TATTTGCG	P7_2	P5_54	CGTACTAGTATTTGCG	0.5X_220527
9	15	CGTACTAG	TCTGGCGA	P7_2	P5_58	CGTACTAGTCTGGCGA	0.5X_220527
9	16	CGTACTAG	ACTTAGAA	P7_2	P5_62	CGTACTAGACTTAGAA	0.5X_220527
9	17	CGTACTAG	ATTACCGT	P7_2	P5_70	CGTACTAGATTACCGT	0.5X_220527
9	18	CGTACTAG	TAGATCGC	P7_2	P5_1	CGTACTAGTAGATCGC	0.5X_220527
9	19	CGTACTAG	GTAAGGAG	P7_2	P5_5	CGTACTAGGTAAGGAG	0.5X_220527
9	20	CGTACTAG	TGGAAATC	P7_2	P5_9	CGTACTAGTGGAAATC	0.5X_220527
9	21	CGTACTAG	TTTCTAGC	P7_2	P5_13	CGTACTAGTTTCTAGC	0.5X_220527
9	22	CGTACTAG	GCATTAAG	P7_2	P5_33	CGTACTAGGCATTAAG	0.5X_220527
9	23	CGTACTAG	GGCACGGA	P7_2	P5_37	CGTACTAGGGCACGGA	0.5X_220527
9	24	CGTACTAG	CCAGTTTA	P7_2	P5_41	CGTACTAGCCAGTTTA	0.5X_220527
9	25	CGTACTAG	TCACATGG	P7_2	P5_45	CGTACTAGTCACATGG	0.5X_220527
9	26	CGTACTAG	ATCGAATG	P7_2	P5_65	CGTACTAGATCGAATG	0.5X_220527
9	27	CGTACTAG	TTCGTGCA	P7_2	P5_17	CGTACTAGTTCGTGCA	0.5X_220527
9	28	CGTACTAG	GGTTCAAT	P7_2	P5_21	CGTACTAGGGTTCAAT	0.5X_220527
9	29	CGTACTAG	AGCCGTTC	P7_2	P5_25	CGTACTAGAGCCGTTC	0.5X_220527
9	30	CGTACTAG	GACGTGGC	P7_2	P5_29	CGTACTAGGACGTGGC	0.5X_220527
9	31	CGTACTAG	GAGACGTG	P7_2	P5_49	CGTACTAGGAGACGTG	0.5X_220527
9	32	CGTACTAG	CGTAGACC	P7_2	P5_53	CGTACTAGCGTAGACC	0.5X_220527
9	33	CGTACTAG	ACGCGCAG	P7_2	P5_57	CGTACTAGACGCGCAG	0.5X_220527
9	34	CGTACTAG	CGATAGGG	P7_2	P5_61	CGTACTAGCGATAGGG	0.5X_220527
9	35	CGTACTAG	CCCTTGGA	P7_2	P5_69	CGTACTAGCCCTTGGA	0.5X_220527
9	36	CGTACTAG	AGAGTAGA	P7_2	P5_4	CGTACTAGAGAGTAGA	0.5X_220527
9	37	CGTACTAG	CTAAGCCT	P7_2	P5_8	CGTACTAGCTAAGCCT	0.5X_220527
9	38	CGTACTAG	GTCGGACT	P7_2	P5_12	CGTACTAGGTCGGACT	0.5X_220527
9	39	CGTACTAG	TCCATCAA	P7_2	P5_16	CGTACTAGTCCATCAA	0.5X_220527
9	40	CGTACTAG	TGATTGTT	P7_2	P5_36	CGTACTAGTGATTGTT	0.5X_220527
9	41	CGTACTAG	CGTACCAA	P7_2	P5_40	CGTACTAGCGTACCAA	0.5X_220527
9	42	CGTACTAG	CGCCAGAT	P7_2	P5_44	CGTACTAGCGCCAGAT	0.5X_220527
9	43	CGTACTAG	TAAGTTAC	P7_2	P5_48	CGTACTAGTAAGTTAC	0.5X_220527
9	44	CGTACTAG	TGGGCGGT	P7_2	P5_68	CGTACTAGTGGGCGGT	0.5X_220527
9	45	CGTACTAG	CAGCAACG	P7_2	P5_20	CGTACTAGCAGCAACG	0.5X_220527
9	46	CGTACTAG	CGGACTGC	P7_2	P5_24	CGTACTAGCGGACTGC	0.5X_220527
9	47	CGTACTAG	GGGCTTGG	P7_2	P5_28	CGTACTAGGGGCTTGG	0.5X_220527
9	48	CGTACTAG	TCCGAGTT	P7_2	P5_32	CGTACTAGTCCGAGTT	0.5X_220527
9	49	CGTACTAG	CTTTAACA	P7_2	P5_52	CGTACTAGCTTTAACA	0.5X_220527
9	50	CGTACTAG	TGTTCCTG	P7_2	P5_56	CGTACTAGTGTTCCTG	0.5X_220527
9	51	CGTACTAG	TACTGACC	P7_2	P5_60	CGTACTAGTACTGACC	0.5X_220527
9	52	CGTACTAG	GGTGAAGG	P7_2	P5_64	CGTACTAGGGTGAAGG	0.5X_220527
9	53	CGTACTAG	ACTTGTTG	P7_2	P5_72	CGTACTAGACTTGTTG	0.5X_220527
9	54	CGTACTAG	TATCCTCT	P7_2	P5_3	CGTACTAGTATCCTCT	0.5X_220527
9	55	CGTACTAG	AAGGAGTA	P7_2	P5_7	CGTACTAGAAGGAGTA	0.5X_220527
9	56	CGTACTAG	TGATGAAA	P7_2	P5_11	CGTACTAGTGATGAAA	0.5X_220527
9	57	CGTACTAG	GTGTATCG	P7_2	P5_15	CGTACTAGGTGTATCG	0.5X_220527
9	58	CGTACTAG	CCTGCGGG	P7_2	P5_35	CGTACTAGCCTGCGGG	0.5X_220527
9	59	CGTACTAG	ATGGTCAT	P7_2	P5_39	CGTACTAGATGGTCAT	0.5X_220527
9	60	CGTACTAG	CTAGAAGT	P7_2	P5_43	CGTACTAGCTAGAAGT	0.5X_220527
9	61	CGTACTAG	CCACCGTT	P7_2	P5_47	CGTACTAGCCACCGTT	0.5X_220527
9	62	CGTACTAG	GCCCACGT	P7_2	P5_67	CGTACTAGGCCCACGT	0.5X_220527
9	63	CGTACTAG	CCTTATGT	P7_2	P5_19	CGTACTAGCCTTATGT	0.5X_220527
9	64	CGTACTAG	GATTCCCA	P7_2	P5_23	CGTACTAGGATTCCCA	0.5X_220527
9	65	CGTACTAG	TGCATACT	P7_2	P5_27	CGTACTAGTGCATACT	0.5X_220527
9	66	CGTACTAG	GCAGCCTC	P7_2	P5_31	CGTACTAGGCAGCCTC	0.5X_220527
9	67	CGTACTAG	TTAACTTG	P7_2	P5_51	CGTACTAGTTAACTTG	0.5X_220527
9	68	CGTACTAG	ATCCAGGA	P7_2	P5_55	CGTACTAGATCCAGGA	0.5X_220527
9	69	CGTACTAG	AATCTACA	P7_2	P5_59	CGTACTAGAATCTACA	0.5X_220527
9	70	CGTACTAG	AGAGATCT	P7_2	P5_63	CGTACTAGAGAGATCT	0.5X_220527
9	71	CGTACTAG	AGTCCGAG	P7_2	P5_71	CGTACTAGAGTCCGAG	0.5X_220527
10	0	TAGGCATG	CTCTCTAT	P7_6	P5_2	TAGGCATGCTCTCTAT	0.5X_220527
10	1	TAGGCATG	ACTGCATA	P7_6	P5_6	TAGGCATGACTGCATA	0.5X_220527
10	2	TAGGCATG	AACATGAT	P7_6	P5_10	TAGGCATGAACATGAT	0.5X_220527
10	3	TAGGCATG	TAACCAAG	P7_6	P5_14	TAGGCATGTAACCAAG	0.5X_220527
10	4	TAGGCATG	ACGATAAC	P7_6	P5_34	TAGGCATGACGATAAC	0.5X_220527
10	5	TAGGCATG	GATCATTC	P7_6	P5_38	TAGGCATGGATCATTC	0.5X_220527
10	6	TAGGCATG	ACCGGCCC	P7_6	P5_42	TAGGCATGACCGGCCC	0.5X_220527
10	7	TAGGCATG	GAACTCGA	P7_6	P5_46	TAGGCATGGAACTCGA	0.5X_220527
10	8	TAGGCATG	TCAAGAGC	P7_6	P5_66	TAGGCATGTCAAGAGC	0.5X_220527
10	9	TAGGCATG	AGGTTGCC	P7_6	P5_18	TAGGCATGAGGTTGCC	0.5X_220527
10	10	TAGGCATG	ACATTCGT	P7_6	P5_22	TAGGCATGACATTCGT	0.5X_220527
10	11	TAGGCATG	ATTGGGTC	P7_6	P5_26	TAGGCATGATTGGGTC	0.5X_220527
10	12	TAGGCATG	GCAAATTT	P7_6	P5_30	TAGGCATGGCAAATTT	0.5X_220527
10	13	TAGGCATG	TTGCCTAA	P7_6	P5_50	TAGGCATGTTGCCTAA	0.5X_220527
10	14	TAGGCATG	TATTTGCG	P7_6	P5_54	TAGGCATGTATTTGCG	0.5X_220527
10	15	TAGGCATG	TCTGGCGA	P7_6	P5_58	TAGGCATGTCTGGCGA	0.5X_220527
10	16	TAGGCATG	ACTTAGAA	P7_6	P5_62	TAGGCATGACTTAGAA	0.5X_220527
10	17	TAGGCATG	ATTACCGT	P7_6	P5_70	TAGGCATGATTACCGT	0.5X_220527
10	18	TAGGCATG	TAGATCGC	P7_6	P5_1	TAGGCATGTAGATCGC	0.5X_220527
10	19	TAGGCATG	GTAAGGAG	P7_6	P5_5	TAGGCATGGTAAGGAG	0.5X_220527
10	20	TAGGCATG	TGGAAATC	P7_6	P5_9	TAGGCATGTGGAAATC	0.5X_220527
10	21	TAGGCATG	TTTCTAGC	P7_6	P5_13	TAGGCATGTTTCTAGC	0.5X_220527
10	22	TAGGCATG	GCATTAAG	P7_6	P5_33	TAGGCATGGCATTAAG	0.5X_220527
10	23	TAGGCATG	GGCACGGA	P7_6	P5_37	TAGGCATGGGCACGGA	0.5X_220527
10	24	TAGGCATG	CCAGTTTA	P7_6	P5_41	TAGGCATGCCAGTTTA	0.5X_220527
10	25	TAGGCATG	TCACATGG	P7_6	P5_45	TAGGCATGTCACATGG	0.5X_220527
10	26	TAGGCATG	ATCGAATG	P7_6	P5_65	TAGGCATGATCGAATG	0.5X_220527
10	27	TAGGCATG	TTCGTGCA	P7_6	P5_17	TAGGCATGTTCGTGCA	0.5X_220527
10	28	TAGGCATG	GGTTCAAT	P7_6	P5_21	TAGGCATGGGTTCAAT	0.5X_220527
10	29	TAGGCATG	AGCCGTTC	P7_6	P5_25	TAGGCATGAGCCGTTC	0.5X_220527
10	30	TAGGCATG	GACGTGGC	P7_6	P5_29	TAGGCATGGACGTGGC	0.5X_220527
10	31	TAGGCATG	GAGACGTG	P7_6	P5_49	TAGGCATGGAGACGTG	0.5X_220527
10	32	TAGGCATG	CGTAGACC	P7_6	P5_53	TAGGCATGCGTAGACC	0.5X_220527
10	33	TAGGCATG	ACGCGCAG	P7_6	P5_57	TAGGCATGACGCGCAG	0.5X_220527
10	34	TAGGCATG	CGATAGGG	P7_6	P5_61	TAGGCATGCGATAGGG	0.5X_220527
10	35	TAGGCATG	CCCTTGGA	P7_6	P5_69	TAGGCATGCCCTTGGA	0.5X_220527
10	36	TAGGCATG	AGAGTAGA	P7_6	P5_4	TAGGCATGAGAGTAGA	0.5X_220527
10	37	TAGGCATG	CTAAGCCT	P7_6	P5_8	TAGGCATGCTAAGCCT	0.5X_220527
10	38	TAGGCATG	GTCGGACT	P7_6	P5_12	TAGGCATGGTCGGACT	0.5X_220527
10	39	TAGGCATG	TCCATCAA	P7_6	P5_16	TAGGCATGTCCATCAA	0.5X_220527
10	40	TAGGCATG	TGATTGTT	P7_6	P5_36	TAGGCATGTGATTGTT	0.5X_220527
10	41	TAGGCATG	CGTACCAA	P7_6	P5_40	TAGGCATGCGTACCAA	0.5X_220527
10	42	TAGGCATG	CGCCAGAT	P7_6	P5_44	TAGGCATGCGCCAGAT	0.5X_220527
10	43	TAGGCATG	TAAGTTAC	P7_6	P5_48	TAGGCATGTAAGTTAC	0.5X_220527
10	44	TAGGCATG	TGGGCGGT	P7_6	P5_68	TAGGCATGTGGGCGGT	0.5X_220527
10	45	TAGGCATG	CAGCAACG	P7_6	P5_20	TAGGCATGCAGCAACG	0.5X_220527
10	46	TAGGCATG	CGGACTGC	P7_6	P5_24	TAGGCATGCGGACTGC	0.5X_220527
10	47	TAGGCATG	GGGCTTGG	P7_6	P5_28	TAGGCATGGGGCTTGG	0.5X_220527
10	48	TAGGCATG	TCCGAGTT	P7_6	P5_32	TAGGCATGTCCGAGTT	0.5X_220527
10	49	TAGGCATG	CTTTAACA	P7_6	P5_52	TAGGCATGCTTTAACA	0.5X_220527
10	50	TAGGCATG	TGTTCCTG	P7_6	P5_56	TAGGCATGTGTTCCTG	0.5X_220527
10	51	TAGGCATG	TACTGACC	P7_6	P5_60	TAGGCATGTACTGACC	0.5X_220527
10	52	TAGGCATG	GGTGAAGG	P7_6	P5_64	TAGGCATGGGTGAAGG	0.5X_220527
10	53	TAGGCATG	ACTTGTTG	P7_6	P5_72	TAGGCATGACTTGTTG	0.5X_220527
10	54	TAGGCATG	TATCCTCT	P7_6	P5_3	TAGGCATGTATCCTCT	0.5X_220527
10	55	TAGGCATG	AAGGAGTA	P7_6	P5_7	TAGGCATGAAGGAGTA	0.5X_220527
10	56	TAGGCATG	TGATGAAA	P7_6	P5_11	TAGGCATGTGATGAAA	0.5X_220527
10	57	TAGGCATG	GTGTATCG	P7_6	P5_15	TAGGCATGGTGTATCG	0.5X_220527
10	58	TAGGCATG	CCTGCGGG	P7_6	P5_35	TAGGCATGCCTGCGGG	0.5X_220527
10	59	TAGGCATG	ATGGTCAT	P7_6	P5_39	TAGGCATGATGGTCAT	0.5X_220527
10	60	TAGGCATG	CTAGAAGT	P7_6	P5_43	TAGGCATGCTAGAAGT	0.5X_220527
10	61	TAGGCATG	CCACCGTT	P7_6	P5_47	TAGGCATGCCACCGTT	0.5X_220527
10	62	TAGGCATG	GCCCACGT	P7_6	P5_67	TAGGCATGGCCCACGT	0.5X_220527
10	63	TAGGCATG	CCTTATGT	P7_6	P5_19	TAGGCATGCCTTATGT	0.5X_220527
10	64	TAGGCATG	GATTCCCA	P7_6	P5_23	TAGGCATGGATTCCCA	0.5X_220527
10	65	TAGGCATG	TGCATACT	P7_6	P5_27	TAGGCATGTGCATACT	0.5X_220527
10	66	TAGGCATG	GCAGCCTC	P7_6	P5_31	TAGGCATGGCAGCCTC	0.5X_220527
10	67	TAGGCATG	TTAACTTG	P7_6	P5_51	TAGGCATGTTAACTTG	0.5X_220527
10	68	TAGGCATG	ATCCAGGA	P7_6	P5_55	TAGGCATGATCCAGGA	0.5X_220527
10	69	TAGGCATG	AATCTACA	P7_6	P5_59	TAGGCATGAATCTACA	0.5X_220527
10	70	TAGGCATG	AGAGATCT	P7_6	P5_63	TAGGCATGAGAGATCT	0.5X_220527
10	71	TAGGCATG	AGTCCGAG	P7_6	P5_71	TAGGCATGAGTCCGAG	0.5X_220527
11	0	CGAGGCTG	CTCTCTAT	P7_10	P5_2	CGAGGCTGCTCTCTAT	0.5X_220527
11	1	CGAGGCTG	ACTGCATA	P7_10	P5_6	CGAGGCTGACTGCATA	0.5X_220527
11	2	CGAGGCTG	AACATGAT	P7_10	P5_10	CGAGGCTGAACATGAT	0.5X_220527
11	3	CGAGGCTG	TAACCAAG	P7_10	P5_14	CGAGGCTGTAACCAAG	0.5X_220527
11	4	CGAGGCTG	ACGATAAC	P7_10	P5_34	CGAGGCTGACGATAAC	0.5X_220527
11	5	CGAGGCTG	GATCATTC	P7_10	P5_38	CGAGGCTGGATCATTC	0.5X_220527
11	6	CGAGGCTG	ACCGGCCC	P7_10	P5_42	CGAGGCTGACCGGCCC	0.5X_220527
11	7	CGAGGCTG	GAACTCGA	P7_10	P5_46	CGAGGCTGGAACTCGA	0.5X_220527
11	8	CGAGGCTG	TCAAGAGC	P7_10	P5_66	CGAGGCTGTCAAGAGC	0.5X_220527
11	9	CGAGGCTG	AGGTTGCC	P7_10	P5_18	CGAGGCTGAGGTTGCC	0.5X_220527
11	10	CGAGGCTG	ACATTCGT	P7_10	P5_22	CGAGGCTGACATTCGT	0.5X_220527
11	11	CGAGGCTG	ATTGGGTC	P7_10	P5_26	CGAGGCTGATTGGGTC	0.5X_220527
11	12	CGAGGCTG	GCAAATTT	P7_10	P5_30	CGAGGCTGGCAAATTT	0.5X_220527
11	13	CGAGGCTG	TTGCCTAA	P7_10	P5_50	CGAGGCTGTTGCCTAA	0.5X_220527
11	14	CGAGGCTG	TATTTGCG	P7_10	P5_54	CGAGGCTGTATTTGCG	0.5X_220527
11	15	CGAGGCTG	TCTGGCGA	P7_10	P5_58	CGAGGCTGTCTGGCGA	0.5X_220527
11	16	CGAGGCTG	ACTTAGAA	P7_10	P5_62	CGAGGCTGACTTAGAA	0.5X_220527
11	17	CGAGGCTG	ATTACCGT	P7_10	P5_70	CGAGGCTGATTACCGT	0.5X_220527
11	18	CGAGGCTG	TAGATCGC	P7_10	P5_1	CGAGGCTGTAGATCGC	0.5X_220527
11	19	CGAGGCTG	GTAAGGAG	P7_10	P5_5	CGAGGCTGGTAAGGAG	0.5X_220527
11	20	CGAGGCTG	TGGAAATC	P7_10	P5_9	CGAGGCTGTGGAAATC	0.5X_220527
11	21	CGAGGCTG	TTTCTAGC	P7_10	P5_13	CGAGGCTGTTTCTAGC	0.5X_220527
11	22	CGAGGCTG	GCATTAAG	P7_10	P5_33	CGAGGCTGGCATTAAG	0.5X_220527
11	23	CGAGGCTG	GGCACGGA	P7_10	P5_37	CGAGGCTGGGCACGGA	0.5X_220527
11	24	CGAGGCTG	CCAGTTTA	P7_10	P5_41	CGAGGCTGCCAGTTTA	0.5X_220527
11	25	CGAGGCTG	TCACATGG	P7_10	P5_45	CGAGGCTGTCACATGG	0.5X_220527
11	26	CGAGGCTG	ATCGAATG	P7_10	P5_65	CGAGGCTGATCGAATG	0.5X_220527
11	27	CGAGGCTG	TTCGTGCA	P7_10	P5_17	CGAGGCTGTTCGTGCA	0.5X_220527
11	28	CGAGGCTG	GGTTCAAT	P7_10	P5_21	CGAGGCTGGGTTCAAT	0.5X_220527
11	29	CGAGGCTG	AGCCGTTC	P7_10	P5_25	CGAGGCTGAGCCGTTC	0.5X_220527
11	30	CGAGGCTG	GACGTGGC	P7_10	P5_29	CGAGGCTGGACGTGGC	0.5X_220527
11	31	CGAGGCTG	GAGACGTG	P7_10	P5_49	CGAGGCTGGAGACGTG	0.5X_220527
11	32	CGAGGCTG	CGTAGACC	P7_10	P5_53	CGAGGCTGCGTAGACC	0.5X_220527
11	33	CGAGGCTG	ACGCGCAG	P7_10	P5_57	CGAGGCTGACGCGCAG	0.5X_220527
11	34	CGAGGCTG	CGATAGGG	P7_10	P5_61	CGAGGCTGCGATAGGG	0.5X_220527
11	35	CGAGGCTG	CCCTTGGA	P7_10	P5_69	CGAGGCTGCCCTTGGA	0.5X_220527
11	36	CGAGGCTG	AGAGTAGA	P7_10	P5_4	CGAGGCTGAGAGTAGA	0.5X_220527
11	37	CGAGGCTG	CTAAGCCT	P7_10	P5_8	CGAGGCTGCTAAGCCT	0.5X_220527
11	38	CGAGGCTG	GTCGGACT	P7_10	P5_12	CGAGGCTGGTCGGACT	0.5X_220527
11	39	CGAGGCTG	TCCATCAA	P7_10	P5_16	CGAGGCTGTCCATCAA	0.5X_220527
11	40	CGAGGCTG	TGATTGTT	P7_10	P5_36	CGAGGCTGTGATTGTT	0.5X_220527
11	41	CGAGGCTG	CGTACCAA	P7_10	P5_40	CGAGGCTGCGTACCAA	0.5X_220527
11	42	CGAGGCTG	CGCCAGAT	P7_10	P5_44	CGAGGCTGCGCCAGAT	0.5X_220527
11	43	CGAGGCTG	TAAGTTAC	P7_10	P5_48	CGAGGCTGTAAGTTAC	0.5X_220527
11	44	CGAGGCTG	TGGGCGGT	P7_10	P5_68	CGAGGCTGTGGGCGGT	0.5X_220527
11	45	CGAGGCTG	CAGCAACG	P7_10	P5_20	CGAGGCTGCAGCAACG	0.5X_220527
11	46	CGAGGCTG	CGGACTGC	P7_10	P5_24	CGAGGCTGCGGACTGC	0.5X_220527
11	47	CGAGGCTG	GGGCTTGG	P7_10	P5_28	CGAGGCTGGGGCTTGG	0.5X_220527
11	48	CGAGGCTG	TCCGAGTT	P7_10	P5_32	CGAGGCTGTCCGAGTT	0.5X_220527
11	49	CGAGGCTG	CTTTAACA	P7_10	P5_52	CGAGGCTGCTTTAACA	0.5X_220527
11	50	CGAGGCTG	TGTTCCTG	P7_10	P5_56	CGAGGCTGTGTTCCTG	0.5X_220527
11	51	CGAGGCTG	TACTGACC	P7_10	P5_60	CGAGGCTGTACTGACC	0.5X_220527
11	52	CGAGGCTG	GGTGAAGG	P7_10	P5_64	CGAGGCTGGGTGAAGG	0.5X_220527
11	53	CGAGGCTG	ACTTGTTG	P7_10	P5_72	CGAGGCTGACTTGTTG	0.5X_220527
11	54	CGAGGCTG	TATCCTCT	P7_10	P5_3	CGAGGCTGTATCCTCT	0.5X_220527
11	55	CGAGGCTG	AAGGAGTA	P7_10	P5_7	CGAGGCTGAAGGAGTA	0.5X_220527
11	56	CGAGGCTG	TGATGAAA	P7_10	P5_11	CGAGGCTGTGATGAAA	0.5X_220527
11	57	CGAGGCTG	GTGTATCG	P7_10	P5_15	CGAGGCTGGTGTATCG	0.5X_220527
11	58	CGAGGCTG	CCTGCGGG	P7_10	P5_35	CGAGGCTGCCTGCGGG	0.5X_220527
11	59	CGAGGCTG	ATGGTCAT	P7_10	P5_39	CGAGGCTGATGGTCAT	0.5X_220527
11	60	CGAGGCTG	CTAGAAGT	P7_10	P5_43	CGAGGCTGCTAGAAGT	0.5X_220527
11	61	CGAGGCTG	CCACCGTT	P7_10	P5_47	CGAGGCTGCCACCGTT	0.5X_220527
11	62	CGAGGCTG	GCCCACGT	P7_10	P5_67	CGAGGCTGGCCCACGT	0.5X_220527
11	63	CGAGGCTG	CCTTATGT	P7_10	P5_19	CGAGGCTGCCTTATGT	0.5X_220527
11	64	CGAGGCTG	GATTCCCA	P7_10	P5_23	CGAGGCTGGATTCCCA	0.5X_220527
11	65	CGAGGCTG	TGCATACT	P7_10	P5_27	CGAGGCTGTGCATACT	0.5X_220527
11	66	CGAGGCTG	GCAGCCTC	P7_10	P5_31	CGAGGCTGGCAGCCTC	0.5X_220527
11	67	CGAGGCTG	TTAACTTG	P7_10	P5_51	CGAGGCTGTTAACTTG	0.5X_220527
11	68	CGAGGCTG	ATCCAGGA	P7_10	P5_55	CGAGGCTGATCCAGGA	0.5X_220527
11	69	CGAGGCTG	AATCTACA	P7_10	P5_59	CGAGGCTGAATCTACA	0.5X_220527
11	70	CGAGGCTG	AGAGATCT	P7_10	P5_63	CGAGGCTGAGAGATCT	0.5X_220527
11	71	CGAGGCTG	AGTCCGAG	P7_10	P5_71	CGAGGCTGAGTCCGAG	0.5X_220527
12	0	CCGTTTGT	CTCTCTAT	P7_14	P5_2	CCGTTTGTCTCTCTAT	0.5X_220527
12	1	CCGTTTGT	ACTGCATA	P7_14	P5_6	CCGTTTGTACTGCATA	0.5X_220527
12	2	CCGTTTGT	AACATGAT	P7_14	P5_10	CCGTTTGTAACATGAT	0.5X_220527
12	3	CCGTTTGT	TAACCAAG	P7_14	P5_14	CCGTTTGTTAACCAAG	0.5X_220527
12	4	CCGTTTGT	ACGATAAC	P7_14	P5_34	CCGTTTGTACGATAAC	0.5X_220527
12	5	CCGTTTGT	GATCATTC	P7_14	P5_38	CCGTTTGTGATCATTC	0.5X_220527
12	6	CCGTTTGT	ACCGGCCC	P7_14	P5_42	CCGTTTGTACCGGCCC	0.5X_220527
12	7	CCGTTTGT	GAACTCGA	P7_14	P5_46	CCGTTTGTGAACTCGA	0.5X_220527
12	8	CCGTTTGT	TCAAGAGC	P7_14	P5_66	CCGTTTGTTCAAGAGC	0.5X_220527
12	9	CCGTTTGT	AGGTTGCC	P7_14	P5_18	CCGTTTGTAGGTTGCC	0.5X_220527
12	10	CCGTTTGT	ACATTCGT	P7_14	P5_22	CCGTTTGTACATTCGT	0.5X_220527
12	11	CCGTTTGT	ATTGGGTC	P7_14	P5_26	CCGTTTGTATTGGGTC	0.5X_220527
12	12	CCGTTTGT	GCAAATTT	P7_14	P5_30	CCGTTTGTGCAAATTT	0.5X_220527
12	13	CCGTTTGT	TTGCCTAA	P7_14	P5_50	CCGTTTGTTTGCCTAA	0.5X_220527
12	14	CCGTTTGT	TATTTGCG	P7_14	P5_54	CCGTTTGTTATTTGCG	0.5X_220527
12	15	CCGTTTGT	TCTGGCGA	P7_14	P5_58	CCGTTTGTTCTGGCGA	0.5X_220527
12	16	CCGTTTGT	ACTTAGAA	P7_14	P5_62	CCGTTTGTACTTAGAA	0.5X_220527
12	17	CCGTTTGT	ATTACCGT	P7_14	P5_70	CCGTTTGTATTACCGT	0.5X_220527
12	18	CCGTTTGT	TAGATCGC	P7_14	P5_1	CCGTTTGTTAGATCGC	0.5X_220527
12	19	CCGTTTGT	GTAAGGAG	P7_14	P5_5	CCGTTTGTGTAAGGAG	0.5X_220527
12	20	CCGTTTGT	TGGAAATC	P7_14	P5_9	CCGTTTGTTGGAAATC	0.5X_220527
12	21	CCGTTTGT	TTTCTAGC	P7_14	P5_13	CCGTTTGTTTTCTAGC	0.5X_220527
12	22	CCGTTTGT	GCATTAAG	P7_14	P5_33	CCGTTTGTGCATTAAG	0.5X_220527
12	23	CCGTTTGT	GGCACGGA	P7_14	P5_37	CCGTTTGTGGCACGGA	0.5X_220527
12	24	CCGTTTGT	CCAGTTTA	P7_14	P5_41	CCGTTTGTCCAGTTTA	0.5X_220527
12	25	CCGTTTGT	TCACATGG	P7_14	P5_45	CCGTTTGTTCACATGG	0.5X_220527
12	26	CCGTTTGT	ATCGAATG	P7_14	P5_65	CCGTTTGTATCGAATG	0.5X_220527
12	27	CCGTTTGT	TTCGTGCA	P7_14	P5_17	CCGTTTGTTTCGTGCA	0.5X_220527
12	28	CCGTTTGT	GGTTCAAT	P7_14	P5_21	CCGTTTGTGGTTCAAT	0.5X_220527
12	29	CCGTTTGT	AGCCGTTC	P7_14	P5_25	CCGTTTGTAGCCGTTC	0.5X_220527
12	30	CCGTTTGT	GACGTGGC	P7_14	P5_29	CCGTTTGTGACGTGGC	0.5X_220527
12	31	CCGTTTGT	GAGACGTG	P7_14	P5_49	CCGTTTGTGAGACGTG	0.5X_220527
12	32	CCGTTTGT	CGTAGACC	P7_14	P5_53	CCGTTTGTCGTAGACC	0.5X_220527
12	33	CCGTTTGT	ACGCGCAG	P7_14	P5_57	CCGTTTGTACGCGCAG	0.5X_220527
12	34	CCGTTTGT	CGATAGGG	P7_14	P5_61	CCGTTTGTCGATAGGG	0.5X_220527
12	35	CCGTTTGT	CCCTTGGA	P7_14	P5_69	CCGTTTGTCCCTTGGA	0.5X_220527
12	36	CCGTTTGT	AGAGTAGA	P7_14	P5_4	CCGTTTGTAGAGTAGA	0.5X_220527
12	37	CCGTTTGT	CTAAGCCT	P7_14	P5_8	CCGTTTGTCTAAGCCT	0.5X_220527
12	38	CCGTTTGT	GTCGGACT	P7_14	P5_12	CCGTTTGTGTCGGACT	0.5X_220527
12	39	CCGTTTGT	TCCATCAA	P7_14	P5_16	CCGTTTGTTCCATCAA	0.5X_220527
12	40	CCGTTTGT	TGATTGTT	P7_14	P5_36	CCGTTTGTTGATTGTT	0.5X_220527
12	41	CCGTTTGT	CGTACCAA	P7_14	P5_40	CCGTTTGTCGTACCAA	0.5X_220527
12	42	CCGTTTGT	CGCCAGAT	P7_14	P5_44	CCGTTTGTCGCCAGAT	0.5X_220527
12	43	CCGTTTGT	TAAGTTAC	P7_14	P5_48	CCGTTTGTTAAGTTAC	0.5X_220527
12	44	CCGTTTGT	TGGGCGGT	P7_14	P5_68	CCGTTTGTTGGGCGGT	0.5X_220527
12	45	CCGTTTGT	CAGCAACG	P7_14	P5_20	CCGTTTGTCAGCAACG	0.5X_220527
12	46	CCGTTTGT	CGGACTGC	P7_14	P5_24	CCGTTTGTCGGACTGC	0.5X_220527
12	47	CCGTTTGT	GGGCTTGG	P7_14	P5_28	CCGTTTGTGGGCTTGG	0.5X_220527
12	48	CCGTTTGT	TCCGAGTT	P7_14	P5_32	CCGTTTGTTCCGAGTT	0.5X_220527
12	49	CCGTTTGT	CTTTAACA	P7_14	P5_52	CCGTTTGTCTTTAACA	0.5X_220527
12	50	CCGTTTGT	TGTTCCTG	P7_14	P5_56	CCGTTTGTTGTTCCTG	0.5X_220527
12	51	CCGTTTGT	TACTGACC	P7_14	P5_60	CCGTTTGTTACTGACC	0.5X_220527
12	52	CCGTTTGT	GGTGAAGG	P7_14	P5_64	CCGTTTGTGGTGAAGG	0.5X_220527
12	53	CCGTTTGT	ACTTGTTG	P7_14	P5_72	CCGTTTGTACTTGTTG	0.5X_220527
12	54	CCGTTTGT	TATCCTCT	P7_14	P5_3	CCGTTTGTTATCCTCT	0.5X_220527
12	55	CCGTTTGT	AAGGAGTA	P7_14	P5_7	CCGTTTGTAAGGAGTA	0.5X_220527
12	56	CCGTTTGT	TGATGAAA	P7_14	P5_11	CCGTTTGTTGATGAAA	0.5X_220527
12	57	CCGTTTGT	GTGTATCG	P7_14	P5_15	CCGTTTGTGTGTATCG	0.5X_220527
12	58	CCGTTTGT	CCTGCGGG	P7_14	P5_35	CCGTTTGTCCTGCGGG	0.5X_220527
12	59	CCGTTTGT	ATGGTCAT	P7_14	P5_39	CCGTTTGTATGGTCAT	0.5X_220527
12	60	CCGTTTGT	CTAGAAGT	P7_14	P5_43	CCGTTTGTCTAGAAGT	0.5X_220527
12	61	CCGTTTGT	CCACCGTT	P7_14	P5_47	CCGTTTGTCCACCGTT	0.5X_220527
12	62	CCGTTTGT	GCCCACGT	P7_14	P5_67	CCGTTTGTGCCCACGT	0.5X_220527
12	63	CCGTTTGT	CCTTATGT	P7_14	P5_19	CCGTTTGTCCTTATGT	0.5X_220527
12	64	CCGTTTGT	GATTCCCA	P7_14	P5_23	CCGTTTGTGATTCCCA	0.5X_220527
12	65	CCGTTTGT	TGCATACT	P7_14	P5_27	CCGTTTGTTGCATACT	0.5X_220527
12	66	CCGTTTGT	GCAGCCTC	P7_14	P5_31	CCGTTTGTGCAGCCTC	0.5X_220527
12	67	CCGTTTGT	TTAACTTG	P7_14	P5_51	CCGTTTGTTTAACTTG	0.5X_220527
12	68	CCGTTTGT	ATCCAGGA	P7_14	P5_55	CCGTTTGTATCCAGGA	0.5X_220527
12	69	CCGTTTGT	AATCTACA	P7_14	P5_59	CCGTTTGTAATCTACA	0.5X_220527
12	70	CCGTTTGT	AGAGATCT	P7_14	P5_63	CCGTTTGTAGAGATCT	0.5X_220527
12	71	CCGTTTGT	AGTCCGAG	P7_14	P5_71	CCGTTTGTAGTCCGAG	0.5X_220527
13	0	AATGGTAG	CTCTCTAT	P7_34	P5_2	AATGGTAGCTCTCTAT	0.5X_220527
13	1	AATGGTAG	ACTGCATA	P7_34	P5_6	AATGGTAGACTGCATA	0.5X_220527
13	3	AATGGTAG	TAACCAAG	P7_34	P5_14	AATGGTAGTAACCAAG	0.5X_220527
13	4	AATGGTAG	ACGATAAC	P7_34	P5_34	AATGGTAGACGATAAC	0.5X_220527
13	5	AATGGTAG	GATCATTC	P7_34	P5_38	AATGGTAGGATCATTC	0.5X_220527
13	6	AATGGTAG	ACCGGCCC	P7_34	P5_42	AATGGTAGACCGGCCC	0.5X_220527
13	7	AATGGTAG	GAACTCGA	P7_34	P5_46	AATGGTAGGAACTCGA	0.5X_220527
13	8	AATGGTAG	TCAAGAGC	P7_34	P5_66	AATGGTAGTCAAGAGC	0.5X_220527
13	10	AATGGTAG	ACATTCGT	P7_34	P5_22	AATGGTAGACATTCGT	0.5X_220527
13	11	AATGGTAG	ATTGGGTC	P7_34	P5_26	AATGGTAGATTGGGTC	0.5X_220527
13	12	AATGGTAG	GCAAATTT	P7_34	P5_30	AATGGTAGGCAAATTT	0.5X_220527
13	13	AATGGTAG	TTGCCTAA	P7_34	P5_50	AATGGTAGTTGCCTAA	0.5X_220527
13	15	AATGGTAG	TCTGGCGA	P7_34	P5_58	AATGGTAGTCTGGCGA	0.5X_220527
13	16	AATGGTAG	ACTTAGAA	P7_34	P5_62	AATGGTAGACTTAGAA	0.5X_220527
13	17	AATGGTAG	ATTACCGT	P7_34	P5_70	AATGGTAGATTACCGT	0.5X_220527
13	18	AATGGTAG	TAGATCGC	P7_34	P5_1	AATGGTAGTAGATCGC	0.5X_220527
13	19	AATGGTAG	GTAAGGAG	P7_34	P5_5	AATGGTAGGTAAGGAG	0.5X_220527
13	20	AATGGTAG	TGGAAATC	P7_34	P5_9	AATGGTAGTGGAAATC	0.5X_220527
13	22	AATGGTAG	GCATTAAG	P7_34	P5_33	AATGGTAGGCATTAAG	0.5X_220527
13	23	AATGGTAG	GGCACGGA	P7_34	P5_37	AATGGTAGGGCACGGA	0.5X_220527
13	24	AATGGTAG	CCAGTTTA	P7_34	P5_41	AATGGTAGCCAGTTTA	0.5X_220527
13	25	AATGGTAG	TCACATGG	P7_34	P5_45	AATGGTAGTCACATGG	0.5X_220527
13	27	AATGGTAG	TTCGTGCA	P7_34	P5_17	AATGGTAGTTCGTGCA	0.5X_220527
13	28	AATGGTAG	GGTTCAAT	P7_34	P5_21	AATGGTAGGGTTCAAT	0.5X_220527
13	29	AATGGTAG	AGCCGTTC	P7_34	P5_25	AATGGTAGAGCCGTTC	0.5X_220527
13	30	AATGGTAG	GACGTGGC	P7_34	P5_29	AATGGTAGGACGTGGC	0.5X_220527
13	31	AATGGTAG	GAGACGTG	P7_34	P5_49	AATGGTAGGAGACGTG	0.5X_220527
13	32	AATGGTAG	CGTAGACC	P7_34	P5_53	AATGGTAGCGTAGACC	0.5X_220527
13	34	AATGGTAG	CGATAGGG	P7_34	P5_61	AATGGTAGCGATAGGG	0.5X_220527
13	35	AATGGTAG	CCCTTGGA	P7_34	P5_69	AATGGTAGCCCTTGGA	0.5X_220527
13	36	AATGGTAG	AGAGTAGA	P7_34	P5_4	AATGGTAGAGAGTAGA	0.5X_220527
13	37	AATGGTAG	CTAAGCCT	P7_34	P5_8	AATGGTAGCTAAGCCT	0.5X_220527
13	39	AATGGTAG	TCCATCAA	P7_34	P5_16	AATGGTAGTCCATCAA	0.5X_220527
13	40	AATGGTAG	TGATTGTT	P7_34	P5_36	AATGGTAGTGATTGTT	0.5X_220527
13	41	AATGGTAG	CGTACCAA	P7_34	P5_40	AATGGTAGCGTACCAA	0.5X_220527
13	42	AATGGTAG	CGCCAGAT	P7_34	P5_44	AATGGTAGCGCCAGAT	0.5X_220527
13	43	AATGGTAG	TAAGTTAC	P7_34	P5_48	AATGGTAGTAAGTTAC	0.5X_220527
13	44	AATGGTAG	TGGGCGGT	P7_34	P5_68	AATGGTAGTGGGCGGT	0.5X_220527
13	46	AATGGTAG	CGGACTGC	P7_34	P5_24	AATGGTAGCGGACTGC	0.5X_220527
13	47	AATGGTAG	GGGCTTGG	P7_34	P5_28	AATGGTAGGGGCTTGG	0.5X_220527
13	48	AATGGTAG	TCCGAGTT	P7_34	P5_32	AATGGTAGTCCGAGTT	0.5X_220527
13	49	AATGGTAG	CTTTAACA	P7_34	P5_52	AATGGTAGCTTTAACA	0.5X_220527
13	51	AATGGTAG	TACTGACC	P7_34	P5_60	AATGGTAGTACTGACC	0.5X_220527
13	52	AATGGTAG	GGTGAAGG	P7_34	P5_64	AATGGTAGGGTGAAGG	0.5X_220527
13	53	AATGGTAG	ACTTGTTG	P7_34	P5_72	AATGGTAGACTTGTTG	0.5X_220527
13	54	AATGGTAG	TATCCTCT	P7_34	P5_3	AATGGTAGTATCCTCT	0.5X_220527
13	55	AATGGTAG	AAGGAGTA	P7_34	P5_7	AATGGTAGAAGGAGTA	0.5X_220527
13	56	AATGGTAG	TGATGAAA	P7_34	P5_11	AATGGTAGTGATGAAA	0.5X_220527
13	58	AATGGTAG	CCTGCGGG	P7_34	P5_35	AATGGTAGCCTGCGGG	0.5X_220527
13	59	AATGGTAG	ATGGTCAT	P7_34	P5_39	AATGGTAGATGGTCAT	0.5X_220527
13	60	AATGGTAG	CTAGAAGT	P7_34	P5_43	AATGGTAGCTAGAAGT	0.5X_220527
13	61	AATGGTAG	CCACCGTT	P7_34	P5_47	AATGGTAGCCACCGTT	0.5X_220527
13	63	AATGGTAG	CCTTATGT	P7_34	P5_19	AATGGTAGCCTTATGT	0.5X_220527
13	64	AATGGTAG	GATTCCCA	P7_34	P5_23	AATGGTAGGATTCCCA	0.5X_220527
13	65	AATGGTAG	TGCATACT	P7_34	P5_27	AATGGTAGTGCATACT	0.5X_220527
13	66	AATGGTAG	GCAGCCTC	P7_34	P5_31	AATGGTAGGCAGCCTC	0.5X_220527
13	67	AATGGTAG	TTAACTTG	P7_34	P5_51	AATGGTAGTTAACTTG	0.5X_220527
13	68	AATGGTAG	ATCCAGGA	P7_34	P5_55	AATGGTAGATCCAGGA	0.5X_220527
13	70	AATGGTAG	AGAGATCT	P7_34	P5_63	AATGGTAGAGAGATCT	0.5X_220527
13	71	AATGGTAG	AGTCCGAG	P7_34	P5_71	AATGGTAGAGTCCGAG	0.5X_220527
14	0	GAAATGCC	CTCTCTAT	P7_38	P5_2	GAAATGCCCTCTCTAT	0.5X_220527
14	1	GAAATGCC	ACTGCATA	P7_38	P5_6	GAAATGCCACTGCATA	0.5X_220527
14	2	GAAATGCC	AACATGAT	P7_38	P5_10	GAAATGCCAACATGAT	0.5X_220527
14	3	GAAATGCC	TAACCAAG	P7_38	P5_14	GAAATGCCTAACCAAG	0.5X_220527
14	4	GAAATGCC	ACGATAAC	P7_38	P5_34	GAAATGCCACGATAAC	0.5X_220527
14	5	GAAATGCC	GATCATTC	P7_38	P5_38	GAAATGCCGATCATTC	0.5X_220527
14	6	GAAATGCC	ACCGGCCC	P7_38	P5_42	GAAATGCCACCGGCCC	0.5X_220527
14	7	GAAATGCC	GAACTCGA	P7_38	P5_46	GAAATGCCGAACTCGA	0.5X_220527
14	8	GAAATGCC	TCAAGAGC	P7_38	P5_66	GAAATGCCTCAAGAGC	0.5X_220527
14	9	GAAATGCC	AGGTTGCC	P7_38	P5_18	GAAATGCCAGGTTGCC	0.5X_220527
14	10	GAAATGCC	ACATTCGT	P7_38	P5_22	GAAATGCCACATTCGT	0.5X_220527
14	11	GAAATGCC	ATTGGGTC	P7_38	P5_26	GAAATGCCATTGGGTC	0.5X_220527
14	12	GAAATGCC	GCAAATTT	P7_38	P5_30	GAAATGCCGCAAATTT	0.5X_220527
14	13	GAAATGCC	TTGCCTAA	P7_38	P5_50	GAAATGCCTTGCCTAA	0.5X_220527
14	14	GAAATGCC	TATTTGCG	P7_38	P5_54	GAAATGCCTATTTGCG	0.5X_220527
14	15	GAAATGCC	TCTGGCGA	P7_38	P5_58	GAAATGCCTCTGGCGA	0.5X_220527
14	16	GAAATGCC	ACTTAGAA	P7_38	P5_62	GAAATGCCACTTAGAA	0.5X_220527
14	17	GAAATGCC	ATTACCGT	P7_38	P5_70	GAAATGCCATTACCGT	0.5X_220527
14	18	GAAATGCC	TAGATCGC	P7_38	P5_1	GAAATGCCTAGATCGC	0.5X_220527
14	19	GAAATGCC	GTAAGGAG	P7_38	P5_5	GAAATGCCGTAAGGAG	0.5X_220527
14	20	GAAATGCC	TGGAAATC	P7_38	P5_9	GAAATGCCTGGAAATC	0.5X_220527
14	21	GAAATGCC	TTTCTAGC	P7_38	P5_13	GAAATGCCTTTCTAGC	0.5X_220527
14	22	GAAATGCC	GCATTAAG	P7_38	P5_33	GAAATGCCGCATTAAG	0.5X_220527
14	23	GAAATGCC	GGCACGGA	P7_38	P5_37	GAAATGCCGGCACGGA	0.5X_220527
14	24	GAAATGCC	CCAGTTTA	P7_38	P5_41	GAAATGCCCCAGTTTA	0.5X_220527
14	25	GAAATGCC	TCACATGG	P7_38	P5_45	GAAATGCCTCACATGG	0.5X_220527
14	26	GAAATGCC	ATCGAATG	P7_38	P5_65	GAAATGCCATCGAATG	0.5X_220527
14	27	GAAATGCC	TTCGTGCA	P7_38	P5_17	GAAATGCCTTCGTGCA	0.5X_220527
14	28	GAAATGCC	GGTTCAAT	P7_38	P5_21	GAAATGCCGGTTCAAT	0.5X_220527
14	29	GAAATGCC	AGCCGTTC	P7_38	P5_25	GAAATGCCAGCCGTTC	0.5X_220527
14	30	GAAATGCC	GACGTGGC	P7_38	P5_29	GAAATGCCGACGTGGC	0.5X_220527
14	31	GAAATGCC	GAGACGTG	P7_38	P5_49	GAAATGCCGAGACGTG	0.5X_220527
14	32	GAAATGCC	CGTAGACC	P7_38	P5_53	GAAATGCCCGTAGACC	0.5X_220527
14	33	GAAATGCC	ACGCGCAG	P7_38	P5_57	GAAATGCCACGCGCAG	0.5X_220527
14	34	GAAATGCC	CGATAGGG	P7_38	P5_61	GAAATGCCCGATAGGG	0.5X_220527
14	35	GAAATGCC	CCCTTGGA	P7_38	P5_69	GAAATGCCCCCTTGGA	0.5X_220527
14	36	GAAATGCC	AGAGTAGA	P7_38	P5_4	GAAATGCCAGAGTAGA	0.5X_220527
14	37	GAAATGCC	CTAAGCCT	P7_38	P5_8	GAAATGCCCTAAGCCT	0.5X_220527
14	38	GAAATGCC	GTCGGACT	P7_38	P5_12	GAAATGCCGTCGGACT	0.5X_220527
14	39	GAAATGCC	TCCATCAA	P7_38	P5_16	GAAATGCCTCCATCAA	0.5X_220527
14	40	GAAATGCC	TGATTGTT	P7_38	P5_36	GAAATGCCTGATTGTT	0.5X_220527
14	41	GAAATGCC	CGTACCAA	P7_38	P5_40	GAAATGCCCGTACCAA	0.5X_220527
14	42	GAAATGCC	CGCCAGAT	P7_38	P5_44	GAAATGCCCGCCAGAT	0.5X_220527
14	43	GAAATGCC	TAAGTTAC	P7_38	P5_48	GAAATGCCTAAGTTAC	0.5X_220527
14	44	GAAATGCC	TGGGCGGT	P7_38	P5_68	GAAATGCCTGGGCGGT	0.5X_220527
14	45	GAAATGCC	CAGCAACG	P7_38	P5_20	GAAATGCCCAGCAACG	0.5X_220527
14	46	GAAATGCC	CGGACTGC	P7_38	P5_24	GAAATGCCCGGACTGC	0.5X_220527
14	47	GAAATGCC	GGGCTTGG	P7_38	P5_28	GAAATGCCGGGCTTGG	0.5X_220527
14	48	GAAATGCC	TCCGAGTT	P7_38	P5_32	GAAATGCCTCCGAGTT	0.5X_220527
14	49	GAAATGCC	CTTTAACA	P7_38	P5_52	GAAATGCCCTTTAACA	0.5X_220527
14	50	GAAATGCC	TGTTCCTG	P7_38	P5_56	GAAATGCCTGTTCCTG	0.5X_220527
14	51	GAAATGCC	TACTGACC	P7_38	P5_60	GAAATGCCTACTGACC	0.5X_220527
14	52	GAAATGCC	GGTGAAGG	P7_38	P5_64	GAAATGCCGGTGAAGG	0.5X_220527
14	53	GAAATGCC	ACTTGTTG	P7_38	P5_72	GAAATGCCACTTGTTG	0.5X_220527
14	54	GAAATGCC	TATCCTCT	P7_38	P5_3	GAAATGCCTATCCTCT	0.5X_220527
14	55	GAAATGCC	AAGGAGTA	P7_38	P5_7	GAAATGCCAAGGAGTA	0.5X_220527
14	56	GAAATGCC	TGATGAAA	P7_38	P5_11	GAAATGCCTGATGAAA	0.5X_220527
14	57	GAAATGCC	GTGTATCG	P7_38	P5_15	GAAATGCCGTGTATCG	0.5X_220527
14	58	GAAATGCC	CCTGCGGG	P7_38	P5_35	GAAATGCCCCTGCGGG	0.5X_220527
14	59	GAAATGCC	ATGGTCAT	P7_38	P5_39	GAAATGCCATGGTCAT	0.5X_220527
14	60	GAAATGCC	CTAGAAGT	P7_38	P5_43	GAAATGCCCTAGAAGT	0.5X_220527
14	61	GAAATGCC	CCACCGTT	P7_38	P5_47	GAAATGCCCCACCGTT	0.5X_220527
14	62	GAAATGCC	GCCCACGT	P7_38	P5_67	GAAATGCCGCCCACGT	0.5X_220527
14	63	GAAATGCC	CCTTATGT	P7_38	P5_19	GAAATGCCCCTTATGT	0.5X_220527
14	64	GAAATGCC	GATTCCCA	P7_38	P5_23	GAAATGCCGATTCCCA	0.5X_220527
14	65	GAAATGCC	TGCATACT	P7_38	P5_27	GAAATGCCTGCATACT	0.5X_220527
14	66	GAAATGCC	GCAGCCTC	P7_38	P5_31	GAAATGCCGCAGCCTC	0.5X_220527
14	67	GAAATGCC	TTAACTTG	P7_38	P5_51	GAAATGCCTTAACTTG	0.5X_220527
14	68	GAAATGCC	ATCCAGGA	P7_38	P5_55	GAAATGCCATCCAGGA	0.5X_220527
14	69	GAAATGCC	AATCTACA	P7_38	P5_59	GAAATGCCAATCTACA	0.5X_220527
14	70	GAAATGCC	AGAGATCT	P7_38	P5_63	GAAATGCCAGAGATCT	0.5X_220527
14	71	GAAATGCC	AGTCCGAG	P7_38	P5_71	GAAATGCCAGTCCGAG	0.5X_220527
15	0	GGTCATTT	CTCTCTAT	P7_42	P5_2	GGTCATTTCTCTCTAT	0.5X_220527
15	1	GGTCATTT	ACTGCATA	P7_42	P5_6	GGTCATTTACTGCATA	0.5X_220527
15	2	GGTCATTT	AACATGAT	P7_42	P5_10	GGTCATTTAACATGAT	0.5X_220527
15	3	GGTCATTT	TAACCAAG	P7_42	P5_14	GGTCATTTTAACCAAG	0.5X_220527
15	4	GGTCATTT	ACGATAAC	P7_42	P5_34	GGTCATTTACGATAAC	0.5X_220527
15	5	GGTCATTT	GATCATTC	P7_42	P5_38	GGTCATTTGATCATTC	0.5X_220527
15	6	GGTCATTT	ACCGGCCC	P7_42	P5_42	GGTCATTTACCGGCCC	0.5X_220527
15	7	GGTCATTT	GAACTCGA	P7_42	P5_46	GGTCATTTGAACTCGA	0.5X_220527
15	8	GGTCATTT	TCAAGAGC	P7_42	P5_66	GGTCATTTTCAAGAGC	0.5X_220527
15	9	GGTCATTT	AGGTTGCC	P7_42	P5_18	GGTCATTTAGGTTGCC	0.5X_220527
15	10	GGTCATTT	ACATTCGT	P7_42	P5_22	GGTCATTTACATTCGT	0.5X_220527
15	11	GGTCATTT	ATTGGGTC	P7_42	P5_26	GGTCATTTATTGGGTC	0.5X_220527
15	12	GGTCATTT	GCAAATTT	P7_42	P5_30	GGTCATTTGCAAATTT	0.5X_220527
15	13	GGTCATTT	TTGCCTAA	P7_42	P5_50	GGTCATTTTTGCCTAA	0.5X_220527
15	14	GGTCATTT	TATTTGCG	P7_42	P5_54	GGTCATTTTATTTGCG	0.5X_220527
15	15	GGTCATTT	TCTGGCGA	P7_42	P5_58	GGTCATTTTCTGGCGA	0.5X_220527
15	16	GGTCATTT	ACTTAGAA	P7_42	P5_62	GGTCATTTACTTAGAA	0.5X_220527
15	17	GGTCATTT	ATTACCGT	P7_42	P5_70	GGTCATTTATTACCGT	0.5X_220527
15	18	GGTCATTT	TAGATCGC	P7_42	P5_1	GGTCATTTTAGATCGC	0.5X_220527
15	19	GGTCATTT	GTAAGGAG	P7_42	P5_5	GGTCATTTGTAAGGAG	0.5X_220527
15	20	GGTCATTT	TGGAAATC	P7_42	P5_9	GGTCATTTTGGAAATC	0.5X_220527
15	21	GGTCATTT	TTTCTAGC	P7_42	P5_13	GGTCATTTTTTCTAGC	0.5X_220527
15	22	GGTCATTT	GCATTAAG	P7_42	P5_33	GGTCATTTGCATTAAG	0.5X_220527
15	23	GGTCATTT	GGCACGGA	P7_42	P5_37	GGTCATTTGGCACGGA	0.5X_220527
15	24	GGTCATTT	CCAGTTTA	P7_42	P5_41	GGTCATTTCCAGTTTA	0.5X_220527
15	25	GGTCATTT	TCACATGG	P7_42	P5_45	GGTCATTTTCACATGG	0.5X_220527
15	26	GGTCATTT	ATCGAATG	P7_42	P5_65	GGTCATTTATCGAATG	0.5X_220527
15	27	GGTCATTT	TTCGTGCA	P7_42	P5_17	GGTCATTTTTCGTGCA	0.5X_220527
15	28	GGTCATTT	GGTTCAAT	P7_42	P5_21	GGTCATTTGGTTCAAT	0.5X_220527
15	29	GGTCATTT	AGCCGTTC	P7_42	P5_25	GGTCATTTAGCCGTTC	0.5X_220527
15	30	GGTCATTT	GACGTGGC	P7_42	P5_29	GGTCATTTGACGTGGC	0.5X_220527
15	31	GGTCATTT	GAGACGTG	P7_42	P5_49	GGTCATTTGAGACGTG	0.5X_220527
15	32	GGTCATTT	CGTAGACC	P7_42	P5_53	GGTCATTTCGTAGACC	0.5X_220527
15	33	GGTCATTT	ACGCGCAG	P7_42	P5_57	GGTCATTTACGCGCAG	0.5X_220527
15	34	GGTCATTT	CGATAGGG	P7_42	P5_61	GGTCATTTCGATAGGG	0.5X_220527
15	35	GGTCATTT	CCCTTGGA	P7_42	P5_69	GGTCATTTCCCTTGGA	0.5X_220527
15	36	GGTCATTT	AGAGTAGA	P7_42	P5_4	GGTCATTTAGAGTAGA	0.5X_220527
15	37	GGTCATTT	CTAAGCCT	P7_42	P5_8	GGTCATTTCTAAGCCT	0.5X_220527
15	38	GGTCATTT	GTCGGACT	P7_42	P5_12	GGTCATTTGTCGGACT	0.5X_220527
15	39	GGTCATTT	TCCATCAA	P7_42	P5_16	GGTCATTTTCCATCAA	0.5X_220527
15	40	GGTCATTT	TGATTGTT	P7_42	P5_36	GGTCATTTTGATTGTT	0.5X_220527
15	41	GGTCATTT	CGTACCAA	P7_42	P5_40	GGTCATTTCGTACCAA	0.5X_220527
15	42	GGTCATTT	CGCCAGAT	P7_42	P5_44	GGTCATTTCGCCAGAT	0.5X_220527
15	43	GGTCATTT	TAAGTTAC	P7_42	P5_48	GGTCATTTTAAGTTAC	0.5X_220527
15	44	GGTCATTT	TGGGCGGT	P7_42	P5_68	GGTCATTTTGGGCGGT	0.5X_220527
15	45	GGTCATTT	CAGCAACG	P7_42	P5_20	GGTCATTTCAGCAACG	0.5X_220527
15	46	GGTCATTT	CGGACTGC	P7_42	P5_24	GGTCATTTCGGACTGC	0.5X_220527
15	47	GGTCATTT	GGGCTTGG	P7_42	P5_28	GGTCATTTGGGCTTGG	0.5X_220527
15	48	GGTCATTT	TCCGAGTT	P7_42	P5_32	GGTCATTTTCCGAGTT	0.5X_220527
15	49	GGTCATTT	CTTTAACA	P7_42	P5_52	GGTCATTTCTTTAACA	0.5X_220527
15	50	GGTCATTT	TGTTCCTG	P7_42	P5_56	GGTCATTTTGTTCCTG	0.5X_220527
15	51	GGTCATTT	TACTGACC	P7_42	P5_60	GGTCATTTTACTGACC	0.5X_220527
15	52	GGTCATTT	GGTGAAGG	P7_42	P5_64	GGTCATTTGGTGAAGG	0.5X_220527
15	53	GGTCATTT	ACTTGTTG	P7_42	P5_72	GGTCATTTACTTGTTG	0.5X_220527
15	54	GGTCATTT	TATCCTCT	P7_42	P5_3	GGTCATTTTATCCTCT	0.5X_220527
15	55	GGTCATTT	AAGGAGTA	P7_42	P5_7	GGTCATTTAAGGAGTA	0.5X_220527
15	56	GGTCATTT	TGATGAAA	P7_42	P5_11	GGTCATTTTGATGAAA	0.5X_220527
15	57	GGTCATTT	GTGTATCG	P7_42	P5_15	GGTCATTTGTGTATCG	0.5X_220527
15	58	GGTCATTT	CCTGCGGG	P7_42	P5_35	GGTCATTTCCTGCGGG	0.5X_220527
15	59	GGTCATTT	ATGGTCAT	P7_42	P5_39	GGTCATTTATGGTCAT	0.5X_220527
15	60	GGTCATTT	CTAGAAGT	P7_42	P5_43	GGTCATTTCTAGAAGT	0.5X_220527
15	61	GGTCATTT	CCACCGTT	P7_42	P5_47	GGTCATTTCCACCGTT	0.5X_220527
15	62	GGTCATTT	GCCCACGT	P7_42	P5_67	GGTCATTTGCCCACGT	0.5X_220527
15	63	GGTCATTT	CCTTATGT	P7_42	P5_19	GGTCATTTCCTTATGT	0.5X_220527
15	64	GGTCATTT	GATTCCCA	P7_42	P5_23	GGTCATTTGATTCCCA	0.5X_220527
15	65	GGTCATTT	TGCATACT	P7_42	P5_27	GGTCATTTTGCATACT	0.5X_220527
15	66	GGTCATTT	GCAGCCTC	P7_42	P5_31	GGTCATTTGCAGCCTC	0.5X_220527
15	67	GGTCATTT	TTAACTTG	P7_42	P5_51	GGTCATTTTTAACTTG	0.5X_220527
15	68	GGTCATTT	ATCCAGGA	P7_42	P5_55	GGTCATTTATCCAGGA	0.5X_220527
15	69	GGTCATTT	AATCTACA	P7_42	P5_59	GGTCATTTAATCTACA	0.5X_220527
15	70	GGTCATTT	AGAGATCT	P7_42	P5_63	GGTCATTTAGAGATCT	0.5X_220527
15	71	GGTCATTT	AGTCCGAG	P7_42	P5_71	GGTCATTTAGTCCGAG	0.5X_220527
16	0	GACTTAGT	CTCTCTAT	P7_46	P5_2	GACTTAGTCTCTCTAT	0.5X_220527
16	1	GACTTAGT	ACTGCATA	P7_46	P5_6	GACTTAGTACTGCATA	0.5X_220527
16	2	GACTTAGT	AACATGAT	P7_46	P5_10	GACTTAGTAACATGAT	0.5X_220527
16	3	GACTTAGT	TAACCAAG	P7_46	P5_14	GACTTAGTTAACCAAG	0.5X_220527
16	4	GACTTAGT	ACGATAAC	P7_46	P5_34	GACTTAGTACGATAAC	0.5X_220527
16	5	GACTTAGT	GATCATTC	P7_46	P5_38	GACTTAGTGATCATTC	0.5X_220527
16	6	GACTTAGT	ACCGGCCC	P7_46	P5_42	GACTTAGTACCGGCCC	0.5X_220527
16	7	GACTTAGT	GAACTCGA	P7_46	P5_46	GACTTAGTGAACTCGA	0.5X_220527
16	8	GACTTAGT	TCAAGAGC	P7_46	P5_66	GACTTAGTTCAAGAGC	0.5X_220527
16	9	GACTTAGT	AGGTTGCC	P7_46	P5_18	GACTTAGTAGGTTGCC	0.5X_220527
16	10	GACTTAGT	ACATTCGT	P7_46	P5_22	GACTTAGTACATTCGT	0.5X_220527
16	11	GACTTAGT	ATTGGGTC	P7_46	P5_26	GACTTAGTATTGGGTC	0.5X_220527
16	12	GACTTAGT	GCAAATTT	P7_46	P5_30	GACTTAGTGCAAATTT	0.5X_220527
16	13	GACTTAGT	TTGCCTAA	P7_46	P5_50	GACTTAGTTTGCCTAA	0.5X_220527
16	14	GACTTAGT	TATTTGCG	P7_46	P5_54	GACTTAGTTATTTGCG	0.5X_220527
16	15	GACTTAGT	TCTGGCGA	P7_46	P5_58	GACTTAGTTCTGGCGA	0.5X_220527
16	16	GACTTAGT	ACTTAGAA	P7_46	P5_62	GACTTAGTACTTAGAA	0.5X_220527
16	17	GACTTAGT	ATTACCGT	P7_46	P5_70	GACTTAGTATTACCGT	0.5X_220527
16	18	GACTTAGT	TAGATCGC	P7_46	P5_1	GACTTAGTTAGATCGC	0.5X_220527
16	19	GACTTAGT	GTAAGGAG	P7_46	P5_5	GACTTAGTGTAAGGAG	0.5X_220527
16	20	GACTTAGT	TGGAAATC	P7_46	P5_9	GACTTAGTTGGAAATC	0.5X_220527
16	21	GACTTAGT	TTTCTAGC	P7_46	P5_13	GACTTAGTTTTCTAGC	0.5X_220527
16	22	GACTTAGT	GCATTAAG	P7_46	P5_33	GACTTAGTGCATTAAG	0.5X_220527
16	23	GACTTAGT	GGCACGGA	P7_46	P5_37	GACTTAGTGGCACGGA	0.5X_220527
16	24	GACTTAGT	CCAGTTTA	P7_46	P5_41	GACTTAGTCCAGTTTA	0.5X_220527
16	25	GACTTAGT	TCACATGG	P7_46	P5_45	GACTTAGTTCACATGG	0.5X_220527
16	26	GACTTAGT	ATCGAATG	P7_46	P5_65	GACTTAGTATCGAATG	0.5X_220527
16	27	GACTTAGT	TTCGTGCA	P7_46	P5_17	GACTTAGTTTCGTGCA	0.5X_220527
16	28	GACTTAGT	GGTTCAAT	P7_46	P5_21	GACTTAGTGGTTCAAT	0.5X_220527
16	29	GACTTAGT	AGCCGTTC	P7_46	P5_25	GACTTAGTAGCCGTTC	0.5X_220527
16	30	GACTTAGT	GACGTGGC	P7_46	P5_29	GACTTAGTGACGTGGC	0.5X_220527
16	31	GACTTAGT	GAGACGTG	P7_46	P5_49	GACTTAGTGAGACGTG	0.5X_220527
16	32	GACTTAGT	CGTAGACC	P7_46	P5_53	GACTTAGTCGTAGACC	0.5X_220527
16	33	GACTTAGT	ACGCGCAG	P7_46	P5_57	GACTTAGTACGCGCAG	0.5X_220527
16	34	GACTTAGT	CGATAGGG	P7_46	P5_61	GACTTAGTCGATAGGG	0.5X_220527
16	35	GACTTAGT	CCCTTGGA	P7_46	P5_69	GACTTAGTCCCTTGGA	0.5X_220527
16	36	GACTTAGT	AGAGTAGA	P7_46	P5_4	GACTTAGTAGAGTAGA	0.5X_220527
16	37	GACTTAGT	CTAAGCCT	P7_46	P5_8	GACTTAGTCTAAGCCT	0.5X_220527
16	38	GACTTAGT	GTCGGACT	P7_46	P5_12	GACTTAGTGTCGGACT	0.5X_220527
16	39	GACTTAGT	TCCATCAA	P7_46	P5_16	GACTTAGTTCCATCAA	0.5X_220527
16	40	GACTTAGT	TGATTGTT	P7_46	P5_36	GACTTAGTTGATTGTT	0.5X_220527
16	41	GACTTAGT	CGTACCAA	P7_46	P5_40	GACTTAGTCGTACCAA	0.5X_220527
16	42	GACTTAGT	CGCCAGAT	P7_46	P5_44	GACTTAGTCGCCAGAT	0.5X_220527
16	43	GACTTAGT	TAAGTTAC	P7_46	P5_48	GACTTAGTTAAGTTAC	0.5X_220527
16	44	GACTTAGT	TGGGCGGT	P7_46	P5_68	GACTTAGTTGGGCGGT	0.5X_220527
16	45	GACTTAGT	CAGCAACG	P7_46	P5_20	GACTTAGTCAGCAACG	0.5X_220527
16	46	GACTTAGT	CGGACTGC	P7_46	P5_24	GACTTAGTCGGACTGC	0.5X_220527
16	47	GACTTAGT	GGGCTTGG	P7_46	P5_28	GACTTAGTGGGCTTGG	0.5X_220527
16	48	GACTTAGT	TCCGAGTT	P7_46	P5_32	GACTTAGTTCCGAGTT	0.5X_220527
16	49	GACTTAGT	CTTTAACA	P7_46	P5_52	GACTTAGTCTTTAACA	0.5X_220527
16	50	GACTTAGT	TGTTCCTG	P7_46	P5_56	GACTTAGTTGTTCCTG	0.5X_220527
16	51	GACTTAGT	TACTGACC	P7_46	P5_60	GACTTAGTTACTGACC	0.5X_220527
16	52	GACTTAGT	GGTGAAGG	P7_46	P5_64	GACTTAGTGGTGAAGG	0.5X_220527
16	53	GACTTAGT	ACTTGTTG	P7_46	P5_72	GACTTAGTACTTGTTG	0.5X_220527
16	54	GACTTAGT	TATCCTCT	P7_46	P5_3	GACTTAGTTATCCTCT	0.5X_220527
16	55	GACTTAGT	AAGGAGTA	P7_46	P5_7	GACTTAGTAAGGAGTA	0.5X_220527
16	56	GACTTAGT	TGATGAAA	P7_46	P5_11	GACTTAGTTGATGAAA	0.5X_220527
16	57	GACTTAGT	GTGTATCG	P7_46	P5_15	GACTTAGTGTGTATCG	0.5X_220527
16	58	GACTTAGT	CCTGCGGG	P7_46	P5_35	GACTTAGTCCTGCGGG	0.5X_220527
16	59	GACTTAGT	ATGGTCAT	P7_46	P5_39	GACTTAGTATGGTCAT	0.5X_220527
16	60	GACTTAGT	CTAGAAGT	P7_46	P5_43	GACTTAGTCTAGAAGT	0.5X_220527
16	61	GACTTAGT	CCACCGTT	P7_46	P5_47	GACTTAGTCCACCGTT	0.5X_220527
16	62	GACTTAGT	GCCCACGT	P7_46	P5_67	GACTTAGTGCCCACGT	0.5X_220527
16	63	GACTTAGT	CCTTATGT	P7_46	P5_19	GACTTAGTCCTTATGT	0.5X_220527
16	64	GACTTAGT	GATTCCCA	P7_46	P5_23	GACTTAGTGATTCCCA	0.5X_220527
16	65	GACTTAGT	TGCATACT	P7_46	P5_27	GACTTAGTTGCATACT	0.5X_220527
16	66	GACTTAGT	GCAGCCTC	P7_46	P5_31	GACTTAGTGCAGCCTC	0.5X_220527
16	67	GACTTAGT	TTAACTTG	P7_46	P5_51	GACTTAGTTTAACTTG	0.5X_220527
16	68	GACTTAGT	ATCCAGGA	P7_46	P5_55	GACTTAGTATCCAGGA	0.5X_220527
16	69	GACTTAGT	AATCTACA	P7_46	P5_59	GACTTAGTAATCTACA	0.5X_220527
16	70	GACTTAGT	AGAGATCT	P7_46	P5_63	GACTTAGTAGAGATCT	0.5X_220527
16	71	GACTTAGT	AGTCCGAG	P7_46	P5_71	GACTTAGTAGTCCGAG	0.5X_220527
17	0	GGTAAACC	CTCTCTAT	P7_66	P5_2	GGTAAACCCTCTCTAT	0.5X_220527
17	1	GGTAAACC	ACTGCATA	P7_66	P5_6	GGTAAACCACTGCATA	0.5X_220527
17	2	GGTAAACC	AACATGAT	P7_66	P5_10	GGTAAACCAACATGAT	0.5X_220527
17	3	GGTAAACC	TAACCAAG	P7_66	P5_14	GGTAAACCTAACCAAG	0.5X_220527
17	4	GGTAAACC	ACGATAAC	P7_66	P5_34	GGTAAACCACGATAAC	0.5X_220527
17	5	GGTAAACC	GATCATTC	P7_66	P5_38	GGTAAACCGATCATTC	0.5X_220527
17	6	GGTAAACC	ACCGGCCC	P7_66	P5_42	GGTAAACCACCGGCCC	0.5X_220527
17	7	GGTAAACC	GAACTCGA	P7_66	P5_46	GGTAAACCGAACTCGA	0.5X_220527
17	8	GGTAAACC	TCAAGAGC	P7_66	P5_66	GGTAAACCTCAAGAGC	0.5X_220527
17	9	GGTAAACC	AGGTTGCC	P7_66	P5_18	GGTAAACCAGGTTGCC	0.5X_220527
17	10	GGTAAACC	ACATTCGT	P7_66	P5_22	GGTAAACCACATTCGT	0.5X_220527
17	11	GGTAAACC	ATTGGGTC	P7_66	P5_26	GGTAAACCATTGGGTC	0.5X_220527
17	12	GGTAAACC	GCAAATTT	P7_66	P5_30	GGTAAACCGCAAATTT	0.5X_220527
17	13	GGTAAACC	TTGCCTAA	P7_66	P5_50	GGTAAACCTTGCCTAA	0.5X_220527
17	14	GGTAAACC	TATTTGCG	P7_66	P5_54	GGTAAACCTATTTGCG	0.5X_220527
17	15	GGTAAACC	TCTGGCGA	P7_66	P5_58	GGTAAACCTCTGGCGA	0.5X_220527
17	16	GGTAAACC	ACTTAGAA	P7_66	P5_62	GGTAAACCACTTAGAA	0.5X_220527
17	17	GGTAAACC	ATTACCGT	P7_66	P5_70	GGTAAACCATTACCGT	0.5X_220527
17	18	GGTAAACC	TAGATCGC	P7_66	P5_1	GGTAAACCTAGATCGC	0.5X_220527
17	19	GGTAAACC	GTAAGGAG	P7_66	P5_5	GGTAAACCGTAAGGAG	0.5X_220527
17	20	GGTAAACC	TGGAAATC	P7_66	P5_9	GGTAAACCTGGAAATC	0.5X_220527
17	21	GGTAAACC	TTTCTAGC	P7_66	P5_13	GGTAAACCTTTCTAGC	0.5X_220527
17	22	GGTAAACC	GCATTAAG	P7_66	P5_33	GGTAAACCGCATTAAG	0.5X_220527
17	23	GGTAAACC	GGCACGGA	P7_66	P5_37	GGTAAACCGGCACGGA	0.5X_220527
17	24	GGTAAACC	CCAGTTTA	P7_66	P5_41	GGTAAACCCCAGTTTA	0.5X_220527
17	25	GGTAAACC	TCACATGG	P7_66	P5_45	GGTAAACCTCACATGG	0.5X_220527
17	26	GGTAAACC	ATCGAATG	P7_66	P5_65	GGTAAACCATCGAATG	0.5X_220527
17	27	GGTAAACC	TTCGTGCA	P7_66	P5_17	GGTAAACCTTCGTGCA	0.5X_220527
17	28	GGTAAACC	GGTTCAAT	P7_66	P5_21	GGTAAACCGGTTCAAT	0.5X_220527
17	29	GGTAAACC	AGCCGTTC	P7_66	P5_25	GGTAAACCAGCCGTTC	0.5X_220527
17	30	GGTAAACC	GACGTGGC	P7_66	P5_29	GGTAAACCGACGTGGC	0.5X_220527
17	31	GGTAAACC	GAGACGTG	P7_66	P5_49	GGTAAACCGAGACGTG	0.5X_220527
17	32	GGTAAACC	CGTAGACC	P7_66	P5_53	GGTAAACCCGTAGACC	0.5X_220527
17	33	GGTAAACC	ACGCGCAG	P7_66	P5_57	GGTAAACCACGCGCAG	0.5X_220527
17	34	GGTAAACC	CGATAGGG	P7_66	P5_61	GGTAAACCCGATAGGG	0.5X_220527
17	35	GGTAAACC	CCCTTGGA	P7_66	P5_69	GGTAAACCCCCTTGGA	0.5X_220527
17	36	GGTAAACC	AGAGTAGA	P7_66	P5_4	GGTAAACCAGAGTAGA	0.5X_220527
17	37	GGTAAACC	CTAAGCCT	P7_66	P5_8	GGTAAACCCTAAGCCT	0.5X_220527
17	38	GGTAAACC	GTCGGACT	P7_66	P5_12	GGTAAACCGTCGGACT	0.5X_220527
17	39	GGTAAACC	TCCATCAA	P7_66	P5_16	GGTAAACCTCCATCAA	0.5X_220527
17	40	GGTAAACC	TGATTGTT	P7_66	P5_36	GGTAAACCTGATTGTT	0.5X_220527
17	41	GGTAAACC	CGTACCAA	P7_66	P5_40	GGTAAACCCGTACCAA	0.5X_220527
17	42	GGTAAACC	CGCCAGAT	P7_66	P5_44	GGTAAACCCGCCAGAT	0.5X_220527
17	43	GGTAAACC	TAAGTTAC	P7_66	P5_48	GGTAAACCTAAGTTAC	0.5X_220527
17	44	GGTAAACC	TGGGCGGT	P7_66	P5_68	GGTAAACCTGGGCGGT	0.5X_220527
17	45	GGTAAACC	CAGCAACG	P7_66	P5_20	GGTAAACCCAGCAACG	0.5X_220527
17	46	GGTAAACC	CGGACTGC	P7_66	P5_24	GGTAAACCCGGACTGC	0.5X_220527
17	47	GGTAAACC	GGGCTTGG	P7_66	P5_28	GGTAAACCGGGCTTGG	0.5X_220527
17	48	GGTAAACC	TCCGAGTT	P7_66	P5_32	GGTAAACCTCCGAGTT	0.5X_220527
17	49	GGTAAACC	CTTTAACA	P7_66	P5_52	GGTAAACCCTTTAACA	0.5X_220527
17	50	GGTAAACC	TGTTCCTG	P7_66	P5_56	GGTAAACCTGTTCCTG	0.5X_220527
17	51	GGTAAACC	TACTGACC	P7_66	P5_60	GGTAAACCTACTGACC	0.5X_220527
17	52	GGTAAACC	GGTGAAGG	P7_66	P5_64	GGTAAACCGGTGAAGG	0.5X_220527
17	53	GGTAAACC	ACTTGTTG	P7_66	P5_72	GGTAAACCACTTGTTG	0.5X_220527
17	54	GGTAAACC	TATCCTCT	P7_66	P5_3	GGTAAACCTATCCTCT	0.5X_220527
17	55	GGTAAACC	AAGGAGTA	P7_66	P5_7	GGTAAACCAAGGAGTA	0.5X_220527
17	56	GGTAAACC	TGATGAAA	P7_66	P5_11	GGTAAACCTGATGAAA	0.5X_220527
17	57	GGTAAACC	GTGTATCG	P7_66	P5_15	GGTAAACCGTGTATCG	0.5X_220527
17	58	GGTAAACC	CCTGCGGG	P7_66	P5_35	GGTAAACCCCTGCGGG	0.5X_220527
17	59	GGTAAACC	ATGGTCAT	P7_66	P5_39	GGTAAACCATGGTCAT	0.5X_220527
17	60	GGTAAACC	CTAGAAGT	P7_66	P5_43	GGTAAACCCTAGAAGT	0.5X_220527
17	61	GGTAAACC	CCACCGTT	P7_66	P5_47	GGTAAACCCCACCGTT	0.5X_220527
17	62	GGTAAACC	GCCCACGT	P7_66	P5_67	GGTAAACCGCCCACGT	0.5X_220527
17	63	GGTAAACC	CCTTATGT	P7_66	P5_19	GGTAAACCCCTTATGT	0.5X_220527
17	64	GGTAAACC	GATTCCCA	P7_66	P5_23	GGTAAACCGATTCCCA	0.5X_220527
17	65	GGTAAACC	TGCATACT	P7_66	P5_27	GGTAAACCTGCATACT	0.5X_220527
17	66	GGTAAACC	GCAGCCTC	P7_66	P5_31	GGTAAACCGCAGCCTC	0.5X_220527
17	67	GGTAAACC	TTAACTTG	P7_66	P5_51	GGTAAACCTTAACTTG	0.5X_220527
17	68	GGTAAACC	ATCCAGGA	P7_66	P5_55	GGTAAACCATCCAGGA	0.5X_220527
17	69	GGTAAACC	AATCTACA	P7_66	P5_59	GGTAAACCAATCTACA	0.5X_220527
17	70	GGTAAACC	AGAGATCT	P7_66	P5_63	GGTAAACCAGAGATCT	0.5X_220527
17	71	GGTAAACC	AGTCCGAG	P7_66	P5_71	GGTAAACCAGTCCGAG	0.5X_220527
36	0	GTGTGGTG	TAGATCGC	P7_17	P5_1	GTGTGGTGTAGATCGC	1X_220527
36	1	GTGTGGTG	GTAAGGAG	P7_17	P5_5	GTGTGGTGGTAAGGAG	1X_220527
36	2	GTGTGGTG	TGGAAATC	P7_17	P5_9	GTGTGGTGTGGAAATC	1X_220527
36	3	GTGTGGTG	TTTCTAGC	P7_17	P5_13	GTGTGGTGTTTCTAGC	1X_220527
36	4	GTGTGGTG	GCATTAAG	P7_17	P5_33	GTGTGGTGGCATTAAG	1X_220527
36	5	GTGTGGTG	GGCACGGA	P7_17	P5_37	GTGTGGTGGGCACGGA	1X_220527
36	6	GTGTGGTG	CCAGTTTA	P7_17	P5_41	GTGTGGTGCCAGTTTA	1X_220527
36	7	GTGTGGTG	TCACATGG	P7_17	P5_45	GTGTGGTGTCACATGG	1X_220527
36	8	GTGTGGTG	ATCGAATG	P7_17	P5_65	GTGTGGTGATCGAATG	1X_220527
36	9	GTGTGGTG	TTCGTGCA	P7_17	P5_17	GTGTGGTGTTCGTGCA	1X_220527
36	10	GTGTGGTG	GGTTCAAT	P7_17	P5_21	GTGTGGTGGGTTCAAT	1X_220527
36	11	GTGTGGTG	AGCCGTTC	P7_17	P5_25	GTGTGGTGAGCCGTTC	1X_220527
36	12	GTGTGGTG	GACGTGGC	P7_17	P5_29	GTGTGGTGGACGTGGC	1X_220527
36	13	GTGTGGTG	GAGACGTG	P7_17	P5_49	GTGTGGTGGAGACGTG	1X_220527
36	14	GTGTGGTG	CGTAGACC	P7_17	P5_53	GTGTGGTGCGTAGACC	1X_220527
36	15	GTGTGGTG	ACGCGCAG	P7_17	P5_57	GTGTGGTGACGCGCAG	1X_220527
36	16	GTGTGGTG	CGATAGGG	P7_17	P5_61	GTGTGGTGCGATAGGG	1X_220527
36	17	GTGTGGTG	CCCTTGGA	P7_17	P5_69	GTGTGGTGCCCTTGGA	1X_220527
36	18	GTGTGGTG	AGAGTAGA	P7_17	P5_4	GTGTGGTGAGAGTAGA	1X_220527
36	19	GTGTGGTG	CTAAGCCT	P7_17	P5_8	GTGTGGTGCTAAGCCT	1X_220527
36	20	GTGTGGTG	GTCGGACT	P7_17	P5_12	GTGTGGTGGTCGGACT	1X_220527
36	21	GTGTGGTG	TCCATCAA	P7_17	P5_16	GTGTGGTGTCCATCAA	1X_220527
36	22	GTGTGGTG	TGATTGTT	P7_17	P5_36	GTGTGGTGTGATTGTT	1X_220527
36	23	GTGTGGTG	CGTACCAA	P7_17	P5_40	GTGTGGTGCGTACCAA	1X_220527
36	24	GTGTGGTG	CGCCAGAT	P7_17	P5_44	GTGTGGTGCGCCAGAT	1X_220527
36	25	GTGTGGTG	TAAGTTAC	P7_17	P5_48	GTGTGGTGTAAGTTAC	1X_220527
36	26	GTGTGGTG	TGGGCGGT	P7_17	P5_68	GTGTGGTGTGGGCGGT	1X_220527
36	27	GTGTGGTG	CAGCAACG	P7_17	P5_20	GTGTGGTGCAGCAACG	1X_220527
36	28	GTGTGGTG	CGGACTGC	P7_17	P5_24	GTGTGGTGCGGACTGC	1X_220527
36	29	GTGTGGTG	GGGCTTGG	P7_17	P5_28	GTGTGGTGGGGCTTGG	1X_220527
36	30	GTGTGGTG	TCCGAGTT	P7_17	P5_32	GTGTGGTGTCCGAGTT	1X_220527
36	31	GTGTGGTG	CTTTAACA	P7_17	P5_52	GTGTGGTGCTTTAACA	1X_220527
36	32	GTGTGGTG	TGTTCCTG	P7_17	P5_56	GTGTGGTGTGTTCCTG	1X_220527
36	33	GTGTGGTG	TACTGACC	P7_17	P5_60	GTGTGGTGTACTGACC	1X_220527
36	34	GTGTGGTG	GGTGAAGG	P7_17	P5_64	GTGTGGTGGGTGAAGG	1X_220527
36	35	GTGTGGTG	ACTTGTTG	P7_17	P5_72	GTGTGGTGACTTGTTG	1X_220527
36	36	GTGTGGTG	TATCCTCT	P7_17	P5_3	GTGTGGTGTATCCTCT	1X_220527
36	37	GTGTGGTG	AAGGAGTA	P7_17	P5_7	GTGTGGTGAAGGAGTA	1X_220527
36	38	GTGTGGTG	TGATGAAA	P7_17	P5_11	GTGTGGTGTGATGAAA	1X_220527
36	39	GTGTGGTG	GTGTATCG	P7_17	P5_15	GTGTGGTGGTGTATCG	1X_220527
36	40	GTGTGGTG	CCTGCGGG	P7_17	P5_35	GTGTGGTGCCTGCGGG	1X_220527
36	41	GTGTGGTG	ATGGTCAT	P7_17	P5_39	GTGTGGTGATGGTCAT	1X_220527
36	42	GTGTGGTG	CTAGAAGT	P7_17	P5_43	GTGTGGTGCTAGAAGT	1X_220527
36	43	GTGTGGTG	CCACCGTT	P7_17	P5_47	GTGTGGTGCCACCGTT	1X_220527
36	44	GTGTGGTG	GCCCACGT	P7_17	P5_67	GTGTGGTGGCCCACGT	1X_220527
36	45	GTGTGGTG	CCTTATGT	P7_17	P5_19	GTGTGGTGCCTTATGT	1X_220527
36	46	GTGTGGTG	GATTCCCA	P7_17	P5_23	GTGTGGTGGATTCCCA	1X_220527
36	47	GTGTGGTG	TGCATACT	P7_17	P5_27	GTGTGGTGTGCATACT	1X_220527
36	48	GTGTGGTG	GCAGCCTC	P7_17	P5_31	GTGTGGTGGCAGCCTC	1X_220527
36	49	GTGTGGTG	TTAACTTG	P7_17	P5_51	GTGTGGTGTTAACTTG	1X_220527
36	50	GTGTGGTG	ATCCAGGA	P7_17	P5_55	GTGTGGTGATCCAGGA	1X_220527
36	51	GTGTGGTG	AATCTACA	P7_17	P5_59	GTGTGGTGAATCTACA	1X_220527
36	52	GTGTGGTG	AGAGATCT	P7_17	P5_63	GTGTGGTGAGAGATCT	1X_220527
36	53	GTGTGGTG	AGTCCGAG	P7_17	P5_71	GTGTGGTGAGTCCGAG	1X_220527
36	54	GTGTGGTG	CTCTCTAT	P7_17	P5_2	GTGTGGTGCTCTCTAT	1X_220527
36	55	GTGTGGTG	ACTGCATA	P7_17	P5_6	GTGTGGTGACTGCATA	1X_220527
36	56	GTGTGGTG	AACATGAT	P7_17	P5_10	GTGTGGTGAACATGAT	1X_220527
36	57	GTGTGGTG	TAACCAAG	P7_17	P5_14	GTGTGGTGTAACCAAG	1X_220527
36	58	GTGTGGTG	ACGATAAC	P7_17	P5_34	GTGTGGTGACGATAAC	1X_220527
36	59	GTGTGGTG	GATCATTC	P7_17	P5_38	GTGTGGTGGATCATTC	1X_220527
36	60	GTGTGGTG	ACCGGCCC	P7_17	P5_42	GTGTGGTGACCGGCCC	1X_220527
36	61	GTGTGGTG	GAACTCGA	P7_17	P5_46	GTGTGGTGGAACTCGA	1X_220527
36	62	GTGTGGTG	TCAAGAGC	P7_17	P5_66	GTGTGGTGTCAAGAGC	1X_220527
36	63	GTGTGGTG	AGGTTGCC	P7_17	P5_18	GTGTGGTGAGGTTGCC	1X_220527
36	64	GTGTGGTG	ACATTCGT	P7_17	P5_22	GTGTGGTGACATTCGT	1X_220527
36	65	GTGTGGTG	ATTGGGTC	P7_17	P5_26	GTGTGGTGATTGGGTC	1X_220527
36	66	GTGTGGTG	GCAAATTT	P7_17	P5_30	GTGTGGTGGCAAATTT	1X_220527
36	67	GTGTGGTG	TTGCCTAA	P7_17	P5_50	GTGTGGTGTTGCCTAA	1X_220527
36	68	GTGTGGTG	TATTTGCG	P7_17	P5_54	GTGTGGTGTATTTGCG	1X_220527
36	69	GTGTGGTG	TCTGGCGA	P7_17	P5_58	GTGTGGTGTCTGGCGA	1X_220527
36	70	GTGTGGTG	ACTTAGAA	P7_17	P5_62	GTGTGGTGACTTAGAA	1X_220527
36	71	GTGTGGTG	ATTACCGT	P7_17	P5_70	GTGTGGTGATTACCGT	1X_220527
37	0	CGCGGACA	TAGATCGC	P7_21	P5_1	CGCGGACATAGATCGC	1X_220527
37	1	CGCGGACA	GTAAGGAG	P7_21	P5_5	CGCGGACAGTAAGGAG	1X_220527
37	2	CGCGGACA	TGGAAATC	P7_21	P5_9	CGCGGACATGGAAATC	1X_220527
37	3	CGCGGACA	TTTCTAGC	P7_21	P5_13	CGCGGACATTTCTAGC	1X_220527
37	4	CGCGGACA	GCATTAAG	P7_21	P5_33	CGCGGACAGCATTAAG	1X_220527
37	5	CGCGGACA	GGCACGGA	P7_21	P5_37	CGCGGACAGGCACGGA	1X_220527
37	6	CGCGGACA	CCAGTTTA	P7_21	P5_41	CGCGGACACCAGTTTA	1X_220527
37	7	CGCGGACA	TCACATGG	P7_21	P5_45	CGCGGACATCACATGG	1X_220527
37	8	CGCGGACA	ATCGAATG	P7_21	P5_65	CGCGGACAATCGAATG	1X_220527
37	9	CGCGGACA	TTCGTGCA	P7_21	P5_17	CGCGGACATTCGTGCA	1X_220527
37	10	CGCGGACA	GGTTCAAT	P7_21	P5_21	CGCGGACAGGTTCAAT	1X_220527
37	11	CGCGGACA	AGCCGTTC	P7_21	P5_25	CGCGGACAAGCCGTTC	1X_220527
37	12	CGCGGACA	GACGTGGC	P7_21	P5_29	CGCGGACAGACGTGGC	1X_220527
37	13	CGCGGACA	GAGACGTG	P7_21	P5_49	CGCGGACAGAGACGTG	1X_220527
37	14	CGCGGACA	CGTAGACC	P7_21	P5_53	CGCGGACACGTAGACC	1X_220527
37	15	CGCGGACA	ACGCGCAG	P7_21	P5_57	CGCGGACAACGCGCAG	1X_220527
37	16	CGCGGACA	CGATAGGG	P7_21	P5_61	CGCGGACACGATAGGG	1X_220527
37	17	CGCGGACA	CCCTTGGA	P7_21	P5_69	CGCGGACACCCTTGGA	1X_220527
37	18	CGCGGACA	AGAGTAGA	P7_21	P5_4	CGCGGACAAGAGTAGA	1X_220527
37	19	CGCGGACA	CTAAGCCT	P7_21	P5_8	CGCGGACACTAAGCCT	1X_220527
37	20	CGCGGACA	GTCGGACT	P7_21	P5_12	CGCGGACAGTCGGACT	1X_220527
37	21	CGCGGACA	TCCATCAA	P7_21	P5_16	CGCGGACATCCATCAA	1X_220527
37	22	CGCGGACA	TGATTGTT	P7_21	P5_36	CGCGGACATGATTGTT	1X_220527
37	23	CGCGGACA	CGTACCAA	P7_21	P5_40	CGCGGACACGTACCAA	1X_220527
37	24	CGCGGACA	CGCCAGAT	P7_21	P5_44	CGCGGACACGCCAGAT	1X_220527
37	25	CGCGGACA	TAAGTTAC	P7_21	P5_48	CGCGGACATAAGTTAC	1X_220527
37	26	CGCGGACA	TGGGCGGT	P7_21	P5_68	CGCGGACATGGGCGGT	1X_220527
37	27	CGCGGACA	CAGCAACG	P7_21	P5_20	CGCGGACACAGCAACG	1X_220527
37	28	CGCGGACA	CGGACTGC	P7_21	P5_24	CGCGGACACGGACTGC	1X_220527
37	29	CGCGGACA	GGGCTTGG	P7_21	P5_28	CGCGGACAGGGCTTGG	1X_220527
37	30	CGCGGACA	TCCGAGTT	P7_21	P5_32	CGCGGACATCCGAGTT	1X_220527
37	31	CGCGGACA	CTTTAACA	P7_21	P5_52	CGCGGACACTTTAACA	1X_220527
37	32	CGCGGACA	TGTTCCTG	P7_21	P5_56	CGCGGACATGTTCCTG	1X_220527
37	33	CGCGGACA	TACTGACC	P7_21	P5_60	CGCGGACATACTGACC	1X_220527
37	34	CGCGGACA	GGTGAAGG	P7_21	P5_64	CGCGGACAGGTGAAGG	1X_220527
37	35	CGCGGACA	ACTTGTTG	P7_21	P5_72	CGCGGACAACTTGTTG	1X_220527
37	36	CGCGGACA	TATCCTCT	P7_21	P5_3	CGCGGACATATCCTCT	1X_220527
37	37	CGCGGACA	AAGGAGTA	P7_21	P5_7	CGCGGACAAAGGAGTA	1X_220527
37	38	CGCGGACA	TGATGAAA	P7_21	P5_11	CGCGGACATGATGAAA	1X_220527
37	39	CGCGGACA	GTGTATCG	P7_21	P5_15	CGCGGACAGTGTATCG	1X_220527
37	40	CGCGGACA	CCTGCGGG	P7_21	P5_35	CGCGGACACCTGCGGG	1X_220527
37	41	CGCGGACA	ATGGTCAT	P7_21	P5_39	CGCGGACAATGGTCAT	1X_220527
37	42	CGCGGACA	CTAGAAGT	P7_21	P5_43	CGCGGACACTAGAAGT	1X_220527
37	43	CGCGGACA	CCACCGTT	P7_21	P5_47	CGCGGACACCACCGTT	1X_220527
37	44	CGCGGACA	GCCCACGT	P7_21	P5_67	CGCGGACAGCCCACGT	1X_220527
37	45	CGCGGACA	CCTTATGT	P7_21	P5_19	CGCGGACACCTTATGT	1X_220527
37	46	CGCGGACA	GATTCCCA	P7_21	P5_23	CGCGGACAGATTCCCA	1X_220527
37	47	CGCGGACA	TGCATACT	P7_21	P5_27	CGCGGACATGCATACT	1X_220527
37	48	CGCGGACA	GCAGCCTC	P7_21	P5_31	CGCGGACAGCAGCCTC	1X_220527
37	49	CGCGGACA	TTAACTTG	P7_21	P5_51	CGCGGACATTAACTTG	1X_220527
37	50	CGCGGACA	ATCCAGGA	P7_21	P5_55	CGCGGACAATCCAGGA	1X_220527
37	51	CGCGGACA	AATCTACA	P7_21	P5_59	CGCGGACAAATCTACA	1X_220527
37	52	CGCGGACA	AGAGATCT	P7_21	P5_63	CGCGGACAAGAGATCT	1X_220527
37	53	CGCGGACA	AGTCCGAG	P7_21	P5_71	CGCGGACAAGTCCGAG	1X_220527
37	54	CGCGGACA	CTCTCTAT	P7_21	P5_2	CGCGGACACTCTCTAT	1X_220527
37	55	CGCGGACA	ACTGCATA	P7_21	P5_6	CGCGGACAACTGCATA	1X_220527
37	56	CGCGGACA	AACATGAT	P7_21	P5_10	CGCGGACAAACATGAT	1X_220527
37	57	CGCGGACA	TAACCAAG	P7_21	P5_14	CGCGGACATAACCAAG	1X_220527
37	58	CGCGGACA	ACGATAAC	P7_21	P5_34	CGCGGACAACGATAAC	1X_220527
37	59	CGCGGACA	GATCATTC	P7_21	P5_38	CGCGGACAGATCATTC	1X_220527
37	60	CGCGGACA	ACCGGCCC	P7_21	P5_42	CGCGGACAACCGGCCC	1X_220527
37	61	CGCGGACA	GAACTCGA	P7_21	P5_46	CGCGGACAGAACTCGA	1X_220527
37	62	CGCGGACA	TCAAGAGC	P7_21	P5_66	CGCGGACATCAAGAGC	1X_220527
37	63	CGCGGACA	AGGTTGCC	P7_21	P5_18	CGCGGACAAGGTTGCC	1X_220527
37	64	CGCGGACA	ACATTCGT	P7_21	P5_22	CGCGGACAACATTCGT	1X_220527
37	65	CGCGGACA	ATTGGGTC	P7_21	P5_26	CGCGGACAATTGGGTC	1X_220527
37	66	CGCGGACA	GCAAATTT	P7_21	P5_30	CGCGGACAGCAAATTT	1X_220527
37	67	CGCGGACA	TTGCCTAA	P7_21	P5_50	CGCGGACATTGCCTAA	1X_220527
37	68	CGCGGACA	TATTTGCG	P7_21	P5_54	CGCGGACATATTTGCG	1X_220527
37	69	CGCGGACA	TCTGGCGA	P7_21	P5_58	CGCGGACATCTGGCGA	1X_220527
37	70	CGCGGACA	ACTTAGAA	P7_21	P5_62	CGCGGACAACTTAGAA	1X_220527
37	71	CGCGGACA	ATTACCGT	P7_21	P5_70	CGCGGACAATTACCGT	1X_220527
38	0	ACAAAGTG	TAGATCGC	P7_25	P5_1	ACAAAGTGTAGATCGC	1X_220527
38	1	ACAAAGTG	GTAAGGAG	P7_25	P5_5	ACAAAGTGGTAAGGAG	1X_220527
38	2	ACAAAGTG	TGGAAATC	P7_25	P5_9	ACAAAGTGTGGAAATC	1X_220527
38	3	ACAAAGTG	TTTCTAGC	P7_25	P5_13	ACAAAGTGTTTCTAGC	1X_220527
38	4	ACAAAGTG	GCATTAAG	P7_25	P5_33	ACAAAGTGGCATTAAG	1X_220527
38	5	ACAAAGTG	GGCACGGA	P7_25	P5_37	ACAAAGTGGGCACGGA	1X_220527
38	6	ACAAAGTG	CCAGTTTA	P7_25	P5_41	ACAAAGTGCCAGTTTA	1X_220527
38	7	ACAAAGTG	TCACATGG	P7_25	P5_45	ACAAAGTGTCACATGG	1X_220527
38	8	ACAAAGTG	ATCGAATG	P7_25	P5_65	ACAAAGTGATCGAATG	1X_220527
38	9	ACAAAGTG	TTCGTGCA	P7_25	P5_17	ACAAAGTGTTCGTGCA	1X_220527
38	10	ACAAAGTG	GGTTCAAT	P7_25	P5_21	ACAAAGTGGGTTCAAT	1X_220527
38	11	ACAAAGTG	AGCCGTTC	P7_25	P5_25	ACAAAGTGAGCCGTTC	1X_220527
38	12	ACAAAGTG	GACGTGGC	P7_25	P5_29	ACAAAGTGGACGTGGC	1X_220527
38	13	ACAAAGTG	GAGACGTG	P7_25	P5_49	ACAAAGTGGAGACGTG	1X_220527
38	14	ACAAAGTG	CGTAGACC	P7_25	P5_53	ACAAAGTGCGTAGACC	1X_220527
38	15	ACAAAGTG	ACGCGCAG	P7_25	P5_57	ACAAAGTGACGCGCAG	1X_220527
38	16	ACAAAGTG	CGATAGGG	P7_25	P5_61	ACAAAGTGCGATAGGG	1X_220527
38	17	ACAAAGTG	CCCTTGGA	P7_25	P5_69	ACAAAGTGCCCTTGGA	1X_220527
38	18	ACAAAGTG	AGAGTAGA	P7_25	P5_4	ACAAAGTGAGAGTAGA	1X_220527
38	19	ACAAAGTG	CTAAGCCT	P7_25	P5_8	ACAAAGTGCTAAGCCT	1X_220527
38	20	ACAAAGTG	GTCGGACT	P7_25	P5_12	ACAAAGTGGTCGGACT	1X_220527
38	21	ACAAAGTG	TCCATCAA	P7_25	P5_16	ACAAAGTGTCCATCAA	1X_220527
38	22	ACAAAGTG	TGATTGTT	P7_25	P5_36	ACAAAGTGTGATTGTT	1X_220527
38	23	ACAAAGTG	CGTACCAA	P7_25	P5_40	ACAAAGTGCGTACCAA	1X_220527
38	24	ACAAAGTG	CGCCAGAT	P7_25	P5_44	ACAAAGTGCGCCAGAT	1X_220527
38	25	ACAAAGTG	TAAGTTAC	P7_25	P5_48	ACAAAGTGTAAGTTAC	1X_220527
38	26	ACAAAGTG	TGGGCGGT	P7_25	P5_68	ACAAAGTGTGGGCGGT	1X_220527
38	27	ACAAAGTG	CAGCAACG	P7_25	P5_20	ACAAAGTGCAGCAACG	1X_220527
38	28	ACAAAGTG	CGGACTGC	P7_25	P5_24	ACAAAGTGCGGACTGC	1X_220527
38	29	ACAAAGTG	GGGCTTGG	P7_25	P5_28	ACAAAGTGGGGCTTGG	1X_220527
38	30	ACAAAGTG	TCCGAGTT	P7_25	P5_32	ACAAAGTGTCCGAGTT	1X_220527
38	31	ACAAAGTG	CTTTAACA	P7_25	P5_52	ACAAAGTGCTTTAACA	1X_220527
38	32	ACAAAGTG	TGTTCCTG	P7_25	P5_56	ACAAAGTGTGTTCCTG	1X_220527
38	33	ACAAAGTG	TACTGACC	P7_25	P5_60	ACAAAGTGTACTGACC	1X_220527
38	34	ACAAAGTG	GGTGAAGG	P7_25	P5_64	ACAAAGTGGGTGAAGG	1X_220527
38	35	ACAAAGTG	ACTTGTTG	P7_25	P5_72	ACAAAGTGACTTGTTG	1X_220527
38	36	ACAAAGTG	TATCCTCT	P7_25	P5_3	ACAAAGTGTATCCTCT	1X_220527
38	37	ACAAAGTG	AAGGAGTA	P7_25	P5_7	ACAAAGTGAAGGAGTA	1X_220527
38	38	ACAAAGTG	TGATGAAA	P7_25	P5_11	ACAAAGTGTGATGAAA	1X_220527
38	39	ACAAAGTG	GTGTATCG	P7_25	P5_15	ACAAAGTGGTGTATCG	1X_220527
38	40	ACAAAGTG	CCTGCGGG	P7_25	P5_35	ACAAAGTGCCTGCGGG	1X_220527
38	41	ACAAAGTG	ATGGTCAT	P7_25	P5_39	ACAAAGTGATGGTCAT	1X_220527
38	42	ACAAAGTG	CTAGAAGT	P7_25	P5_43	ACAAAGTGCTAGAAGT	1X_220527
38	43	ACAAAGTG	CCACCGTT	P7_25	P5_47	ACAAAGTGCCACCGTT	1X_220527
38	44	ACAAAGTG	GCCCACGT	P7_25	P5_67	ACAAAGTGGCCCACGT	1X_220527
38	45	ACAAAGTG	CCTTATGT	P7_25	P5_19	ACAAAGTGCCTTATGT	1X_220527
38	46	ACAAAGTG	GATTCCCA	P7_25	P5_23	ACAAAGTGGATTCCCA	1X_220527
38	47	ACAAAGTG	TGCATACT	P7_25	P5_27	ACAAAGTGTGCATACT	1X_220527
38	48	ACAAAGTG	GCAGCCTC	P7_25	P5_31	ACAAAGTGGCAGCCTC	1X_220527
38	49	ACAAAGTG	TTAACTTG	P7_25	P5_51	ACAAAGTGTTAACTTG	1X_220527
38	50	ACAAAGTG	ATCCAGGA	P7_25	P5_55	ACAAAGTGATCCAGGA	1X_220527
38	51	ACAAAGTG	AATCTACA	P7_25	P5_59	ACAAAGTGAATCTACA	1X_220527
38	52	ACAAAGTG	AGAGATCT	P7_25	P5_63	ACAAAGTGAGAGATCT	1X_220527
38	53	ACAAAGTG	AGTCCGAG	P7_25	P5_71	ACAAAGTGAGTCCGAG	1X_220527
38	54	ACAAAGTG	CTCTCTAT	P7_25	P5_2	ACAAAGTGCTCTCTAT	1X_220527
38	55	ACAAAGTG	ACTGCATA	P7_25	P5_6	ACAAAGTGACTGCATA	1X_220527
38	56	ACAAAGTG	AACATGAT	P7_25	P5_10	ACAAAGTGAACATGAT	1X_220527
38	57	ACAAAGTG	TAACCAAG	P7_25	P5_14	ACAAAGTGTAACCAAG	1X_220527
38	58	ACAAAGTG	ACGATAAC	P7_25	P5_34	ACAAAGTGACGATAAC	1X_220527
38	59	ACAAAGTG	GATCATTC	P7_25	P5_38	ACAAAGTGGATCATTC	1X_220527
38	60	ACAAAGTG	ACCGGCCC	P7_25	P5_42	ACAAAGTGACCGGCCC	1X_220527
38	61	ACAAAGTG	GAACTCGA	P7_25	P5_46	ACAAAGTGGAACTCGA	1X_220527
38	62	ACAAAGTG	TCAAGAGC	P7_25	P5_66	ACAAAGTGTCAAGAGC	1X_220527
38	63	ACAAAGTG	AGGTTGCC	P7_25	P5_18	ACAAAGTGAGGTTGCC	1X_220527
38	64	ACAAAGTG	ACATTCGT	P7_25	P5_22	ACAAAGTGACATTCGT	1X_220527
38	65	ACAAAGTG	ATTGGGTC	P7_25	P5_26	ACAAAGTGATTGGGTC	1X_220527
38	66	ACAAAGTG	GCAAATTT	P7_25	P5_30	ACAAAGTGGCAAATTT	1X_220527
38	67	ACAAAGTG	TTGCCTAA	P7_25	P5_50	ACAAAGTGTTGCCTAA	1X_220527
38	68	ACAAAGTG	TATTTGCG	P7_25	P5_54	ACAAAGTGTATTTGCG	1X_220527
38	69	ACAAAGTG	TCTGGCGA	P7_25	P5_58	ACAAAGTGTCTGGCGA	1X_220527
38	70	ACAAAGTG	ACTTAGAA	P7_25	P5_62	ACAAAGTGACTTAGAA	1X_220527
38	71	ACAAAGTG	ATTACCGT	P7_25	P5_70	ACAAAGTGATTACCGT	1X_220527
39	0	ATTGCCGG	TAGATCGC	P7_29	P5_1	ATTGCCGGTAGATCGC	1X_220527
39	1	ATTGCCGG	GTAAGGAG	P7_29	P5_5	ATTGCCGGGTAAGGAG	1X_220527
39	2	ATTGCCGG	TGGAAATC	P7_29	P5_9	ATTGCCGGTGGAAATC	1X_220527
39	3	ATTGCCGG	TTTCTAGC	P7_29	P5_13	ATTGCCGGTTTCTAGC	1X_220527
39	4	ATTGCCGG	GCATTAAG	P7_29	P5_33	ATTGCCGGGCATTAAG	1X_220527
39	5	ATTGCCGG	GGCACGGA	P7_29	P5_37	ATTGCCGGGGCACGGA	1X_220527
39	6	ATTGCCGG	CCAGTTTA	P7_29	P5_41	ATTGCCGGCCAGTTTA	1X_220527
39	7	ATTGCCGG	TCACATGG	P7_29	P5_45	ATTGCCGGTCACATGG	1X_220527
39	8	ATTGCCGG	ATCGAATG	P7_29	P5_65	ATTGCCGGATCGAATG	1X_220527
39	9	ATTGCCGG	TTCGTGCA	P7_29	P5_17	ATTGCCGGTTCGTGCA	1X_220527
39	10	ATTGCCGG	GGTTCAAT	P7_29	P5_21	ATTGCCGGGGTTCAAT	1X_220527
39	11	ATTGCCGG	AGCCGTTC	P7_29	P5_25	ATTGCCGGAGCCGTTC	1X_220527
39	12	ATTGCCGG	GACGTGGC	P7_29	P5_29	ATTGCCGGGACGTGGC	1X_220527
39	13	ATTGCCGG	GAGACGTG	P7_29	P5_49	ATTGCCGGGAGACGTG	1X_220527
39	14	ATTGCCGG	CGTAGACC	P7_29	P5_53	ATTGCCGGCGTAGACC	1X_220527
39	15	ATTGCCGG	ACGCGCAG	P7_29	P5_57	ATTGCCGGACGCGCAG	1X_220527
39	16	ATTGCCGG	CGATAGGG	P7_29	P5_61	ATTGCCGGCGATAGGG	1X_220527
39	17	ATTGCCGG	CCCTTGGA	P7_29	P5_69	ATTGCCGGCCCTTGGA	1X_220527
39	18	ATTGCCGG	AGAGTAGA	P7_29	P5_4	ATTGCCGGAGAGTAGA	1X_220527
39	19	ATTGCCGG	CTAAGCCT	P7_29	P5_8	ATTGCCGGCTAAGCCT	1X_220527
39	20	ATTGCCGG	GTCGGACT	P7_29	P5_12	ATTGCCGGGTCGGACT	1X_220527
39	21	ATTGCCGG	TCCATCAA	P7_29	P5_16	ATTGCCGGTCCATCAA	1X_220527
39	22	ATTGCCGG	TGATTGTT	P7_29	P5_36	ATTGCCGGTGATTGTT	1X_220527
39	23	ATTGCCGG	CGTACCAA	P7_29	P5_40	ATTGCCGGCGTACCAA	1X_220527
39	24	ATTGCCGG	CGCCAGAT	P7_29	P5_44	ATTGCCGGCGCCAGAT	1X_220527
39	25	ATTGCCGG	TAAGTTAC	P7_29	P5_48	ATTGCCGGTAAGTTAC	1X_220527
39	26	ATTGCCGG	TGGGCGGT	P7_29	P5_68	ATTGCCGGTGGGCGGT	1X_220527
39	27	ATTGCCGG	CAGCAACG	P7_29	P5_20	ATTGCCGGCAGCAACG	1X_220527
39	28	ATTGCCGG	CGGACTGC	P7_29	P5_24	ATTGCCGGCGGACTGC	1X_220527
39	29	ATTGCCGG	GGGCTTGG	P7_29	P5_28	ATTGCCGGGGGCTTGG	1X_220527
39	30	ATTGCCGG	TCCGAGTT	P7_29	P5_32	ATTGCCGGTCCGAGTT	1X_220527
39	31	ATTGCCGG	CTTTAACA	P7_29	P5_52	ATTGCCGGCTTTAACA	1X_220527
39	32	ATTGCCGG	TGTTCCTG	P7_29	P5_56	ATTGCCGGTGTTCCTG	1X_220527
39	33	ATTGCCGG	TACTGACC	P7_29	P5_60	ATTGCCGGTACTGACC	1X_220527
39	34	ATTGCCGG	GGTGAAGG	P7_29	P5_64	ATTGCCGGGGTGAAGG	1X_220527
39	35	ATTGCCGG	ACTTGTTG	P7_29	P5_72	ATTGCCGGACTTGTTG	1X_220527
39	36	ATTGCCGG	TATCCTCT	P7_29	P5_3	ATTGCCGGTATCCTCT	1X_220527
39	37	ATTGCCGG	AAGGAGTA	P7_29	P5_7	ATTGCCGGAAGGAGTA	1X_220527
39	38	ATTGCCGG	TGATGAAA	P7_29	P5_11	ATTGCCGGTGATGAAA	1X_220527
39	39	ATTGCCGG	GTGTATCG	P7_29	P5_15	ATTGCCGGGTGTATCG	1X_220527
39	40	ATTGCCGG	CCTGCGGG	P7_29	P5_35	ATTGCCGGCCTGCGGG	1X_220527
39	41	ATTGCCGG	ATGGTCAT	P7_29	P5_39	ATTGCCGGATGGTCAT	1X_220527
39	42	ATTGCCGG	CTAGAAGT	P7_29	P5_43	ATTGCCGGCTAGAAGT	1X_220527
39	43	ATTGCCGG	CCACCGTT	P7_29	P5_47	ATTGCCGGCCACCGTT	1X_220527
39	44	ATTGCCGG	GCCCACGT	P7_29	P5_67	ATTGCCGGGCCCACGT	1X_220527
39	45	ATTGCCGG	CCTTATGT	P7_29	P5_19	ATTGCCGGCCTTATGT	1X_220527
39	46	ATTGCCGG	GATTCCCA	P7_29	P5_23	ATTGCCGGGATTCCCA	1X_220527
39	47	ATTGCCGG	TGCATACT	P7_29	P5_27	ATTGCCGGTGCATACT	1X_220527
39	48	ATTGCCGG	GCAGCCTC	P7_29	P5_31	ATTGCCGGGCAGCCTC	1X_220527
39	49	ATTGCCGG	TTAACTTG	P7_29	P5_51	ATTGCCGGTTAACTTG	1X_220527
39	50	ATTGCCGG	ATCCAGGA	P7_29	P5_55	ATTGCCGGATCCAGGA	1X_220527
39	51	ATTGCCGG	AATCTACA	P7_29	P5_59	ATTGCCGGAATCTACA	1X_220527
39	52	ATTGCCGG	AGAGATCT	P7_29	P5_63	ATTGCCGGAGAGATCT	1X_220527
39	53	ATTGCCGG	AGTCCGAG	P7_29	P5_71	ATTGCCGGAGTCCGAG	1X_220527
39	54	ATTGCCGG	CTCTCTAT	P7_29	P5_2	ATTGCCGGCTCTCTAT	1X_220527
39	55	ATTGCCGG	ACTGCATA	P7_29	P5_6	ATTGCCGGACTGCATA	1X_220527
39	56	ATTGCCGG	AACATGAT	P7_29	P5_10	ATTGCCGGAACATGAT	1X_220527
39	57	ATTGCCGG	TAACCAAG	P7_29	P5_14	ATTGCCGGTAACCAAG	1X_220527
39	58	ATTGCCGG	ACGATAAC	P7_29	P5_34	ATTGCCGGACGATAAC	1X_220527
39	59	ATTGCCGG	GATCATTC	P7_29	P5_38	ATTGCCGGGATCATTC	1X_220527
39	60	ATTGCCGG	ACCGGCCC	P7_29	P5_42	ATTGCCGGACCGGCCC	1X_220527
39	61	ATTGCCGG	GAACTCGA	P7_29	P5_46	ATTGCCGGGAACTCGA	1X_220527
39	62	ATTGCCGG	TCAAGAGC	P7_29	P5_66	ATTGCCGGTCAAGAGC	1X_220527
39	63	ATTGCCGG	AGGTTGCC	P7_29	P5_18	ATTGCCGGAGGTTGCC	1X_220527
39	64	ATTGCCGG	ACATTCGT	P7_29	P5_22	ATTGCCGGACATTCGT	1X_220527
39	65	ATTGCCGG	ATTGGGTC	P7_29	P5_26	ATTGCCGGATTGGGTC	1X_220527
39	66	ATTGCCGG	GCAAATTT	P7_29	P5_30	ATTGCCGGGCAAATTT	1X_220527
39	67	ATTGCCGG	TTGCCTAA	P7_29	P5_50	ATTGCCGGTTGCCTAA	1X_220527
39	68	ATTGCCGG	TATTTGCG	P7_29	P5_54	ATTGCCGGTATTTGCG	1X_220527
39	69	ATTGCCGG	TCTGGCGA	P7_29	P5_58	ATTGCCGGTCTGGCGA	1X_220527
39	70	ATTGCCGG	ACTTAGAA	P7_29	P5_62	ATTGCCGGACTTAGAA	1X_220527
39	71	ATTGCCGG	ATTACCGT	P7_29	P5_70	ATTGCCGGATTACCGT	1X_220527
40	0	TTATGAAA	TAGATCGC	P7_49	P5_1	TTATGAAATAGATCGC	1X_220527
40	1	TTATGAAA	GTAAGGAG	P7_49	P5_5	TTATGAAAGTAAGGAG	1X_220527
40	3	TTATGAAA	TTTCTAGC	P7_49	P5_13	TTATGAAATTTCTAGC	1X_220527
40	4	TTATGAAA	GCATTAAG	P7_49	P5_33	TTATGAAAGCATTAAG	1X_220527
40	5	TTATGAAA	GGCACGGA	P7_49	P5_37	TTATGAAAGGCACGGA	1X_220527
40	6	TTATGAAA	CCAGTTTA	P7_49	P5_41	TTATGAAACCAGTTTA	1X_220527
40	7	TTATGAAA	TCACATGG	P7_49	P5_45	TTATGAAATCACATGG	1X_220527
40	8	TTATGAAA	ATCGAATG	P7_49	P5_65	TTATGAAAATCGAATG	1X_220527
40	10	TTATGAAA	GGTTCAAT	P7_49	P5_21	TTATGAAAGGTTCAAT	1X_220527
40	11	TTATGAAA	AGCCGTTC	P7_49	P5_25	TTATGAAAAGCCGTTC	1X_220527
40	12	TTATGAAA	GACGTGGC	P7_49	P5_29	TTATGAAAGACGTGGC	1X_220527
40	13	TTATGAAA	GAGACGTG	P7_49	P5_49	TTATGAAAGAGACGTG	1X_220527
40	15	TTATGAAA	ACGCGCAG	P7_49	P5_57	TTATGAAAACGCGCAG	1X_220527
40	16	TTATGAAA	CGATAGGG	P7_49	P5_61	TTATGAAACGATAGGG	1X_220527
40	17	TTATGAAA	CCCTTGGA	P7_49	P5_69	TTATGAAACCCTTGGA	1X_220527
40	18	TTATGAAA	AGAGTAGA	P7_49	P5_4	TTATGAAAAGAGTAGA	1X_220527
40	19	TTATGAAA	CTAAGCCT	P7_49	P5_8	TTATGAAACTAAGCCT	1X_220527
40	20	TTATGAAA	GTCGGACT	P7_49	P5_12	TTATGAAAGTCGGACT	1X_220527
40	22	TTATGAAA	TGATTGTT	P7_49	P5_36	TTATGAAATGATTGTT	1X_220527
40	23	TTATGAAA	CGTACCAA	P7_49	P5_40	TTATGAAACGTACCAA	1X_220527
40	24	TTATGAAA	CGCCAGAT	P7_49	P5_44	TTATGAAACGCCAGAT	1X_220527
40	25	TTATGAAA	TAAGTTAC	P7_49	P5_48	TTATGAAATAAGTTAC	1X_220527
40	27	TTATGAAA	CAGCAACG	P7_49	P5_20	TTATGAAACAGCAACG	1X_220527
40	28	TTATGAAA	CGGACTGC	P7_49	P5_24	TTATGAAACGGACTGC	1X_220527
40	29	TTATGAAA	GGGCTTGG	P7_49	P5_28	TTATGAAAGGGCTTGG	1X_220527
40	30	TTATGAAA	TCCGAGTT	P7_49	P5_32	TTATGAAATCCGAGTT	1X_220527
40	31	TTATGAAA	CTTTAACA	P7_49	P5_52	TTATGAAACTTTAACA	1X_220527
40	32	TTATGAAA	TGTTCCTG	P7_49	P5_56	TTATGAAATGTTCCTG	1X_220527
40	34	TTATGAAA	GGTGAAGG	P7_49	P5_64	TTATGAAAGGTGAAGG	1X_220527
40	35	TTATGAAA	ACTTGTTG	P7_49	P5_72	TTATGAAAACTTGTTG	1X_220527
40	36	TTATGAAA	TATCCTCT	P7_49	P5_3	TTATGAAATATCCTCT	1X_220527
40	37	TTATGAAA	AAGGAGTA	P7_49	P5_7	TTATGAAAAAGGAGTA	1X_220527
40	39	TTATGAAA	GTGTATCG	P7_49	P5_15	TTATGAAAGTGTATCG	1X_220527
40	40	TTATGAAA	CCTGCGGG	P7_49	P5_35	TTATGAAACCTGCGGG	1X_220527
40	41	TTATGAAA	ATGGTCAT	P7_49	P5_39	TTATGAAAATGGTCAT	1X_220527
40	42	TTATGAAA	CTAGAAGT	P7_49	P5_43	TTATGAAACTAGAAGT	1X_220527
40	43	TTATGAAA	CCACCGTT	P7_49	P5_47	TTATGAAACCACCGTT	1X_220527
40	44	TTATGAAA	GCCCACGT	P7_49	P5_67	TTATGAAAGCCCACGT	1X_220527
40	46	TTATGAAA	GATTCCCA	P7_49	P5_23	TTATGAAAGATTCCCA	1X_220527
40	47	TTATGAAA	TGCATACT	P7_49	P5_27	TTATGAAATGCATACT	1X_220527
40	48	TTATGAAA	GCAGCCTC	P7_49	P5_31	TTATGAAAGCAGCCTC	1X_220527
40	49	TTATGAAA	TTAACTTG	P7_49	P5_51	TTATGAAATTAACTTG	1X_220527
40	51	TTATGAAA	AATCTACA	P7_49	P5_59	TTATGAAAAATCTACA	1X_220527
40	52	TTATGAAA	AGAGATCT	P7_49	P5_63	TTATGAAAAGAGATCT	1X_220527
40	53	TTATGAAA	AGTCCGAG	P7_49	P5_71	TTATGAAAAGTCCGAG	1X_220527
40	54	TTATGAAA	CTCTCTAT	P7_49	P5_2	TTATGAAACTCTCTAT	1X_220527
40	55	TTATGAAA	ACTGCATA	P7_49	P5_6	TTATGAAAACTGCATA	1X_220527
40	56	TTATGAAA	AACATGAT	P7_49	P5_10	TTATGAAAAACATGAT	1X_220527
40	58	TTATGAAA	ACGATAAC	P7_49	P5_34	TTATGAAAACGATAAC	1X_220527
40	59	TTATGAAA	GATCATTC	P7_49	P5_38	TTATGAAAGATCATTC	1X_220527
40	60	TTATGAAA	ACCGGCCC	P7_49	P5_42	TTATGAAAACCGGCCC	1X_220527
40	61	TTATGAAA	GAACTCGA	P7_49	P5_46	TTATGAAAGAACTCGA	1X_220527
40	63	TTATGAAA	AGGTTGCC	P7_49	P5_18	TTATGAAAAGGTTGCC	1X_220527
40	64	TTATGAAA	ACATTCGT	P7_49	P5_22	TTATGAAAACATTCGT	1X_220527
40	65	TTATGAAA	ATTGGGTC	P7_49	P5_26	TTATGAAAATTGGGTC	1X_220527
40	66	TTATGAAA	GCAAATTT	P7_49	P5_30	TTATGAAAGCAAATTT	1X_220527
40	67	TTATGAAA	TTGCCTAA	P7_49	P5_50	TTATGAAATTGCCTAA	1X_220527
40	68	TTATGAAA	TATTTGCG	P7_49	P5_54	TTATGAAATATTTGCG	1X_220527
40	70	TTATGAAA	ACTTAGAA	P7_49	P5_62	TTATGAAAACTTAGAA	1X_220527
40	71	TTATGAAA	ATTACCGT	P7_49	P5_70	TTATGAAAATTACCGT	1X_220527
41	0	CATCCTGT	TAGATCGC	P7_53	P5_1	CATCCTGTTAGATCGC	1X_220527
41	1	CATCCTGT	GTAAGGAG	P7_53	P5_5	CATCCTGTGTAAGGAG	1X_220527
41	2	CATCCTGT	TGGAAATC	P7_53	P5_9	CATCCTGTTGGAAATC	1X_220527
41	3	CATCCTGT	TTTCTAGC	P7_53	P5_13	CATCCTGTTTTCTAGC	1X_220527
41	4	CATCCTGT	GCATTAAG	P7_53	P5_33	CATCCTGTGCATTAAG	1X_220527
41	5	CATCCTGT	GGCACGGA	P7_53	P5_37	CATCCTGTGGCACGGA	1X_220527
41	6	CATCCTGT	CCAGTTTA	P7_53	P5_41	CATCCTGTCCAGTTTA	1X_220527
41	7	CATCCTGT	TCACATGG	P7_53	P5_45	CATCCTGTTCACATGG	1X_220527
41	8	CATCCTGT	ATCGAATG	P7_53	P5_65	CATCCTGTATCGAATG	1X_220527
41	9	CATCCTGT	TTCGTGCA	P7_53	P5_17	CATCCTGTTTCGTGCA	1X_220527
41	10	CATCCTGT	GGTTCAAT	P7_53	P5_21	CATCCTGTGGTTCAAT	1X_220527
41	11	CATCCTGT	AGCCGTTC	P7_53	P5_25	CATCCTGTAGCCGTTC	1X_220527
41	12	CATCCTGT	GACGTGGC	P7_53	P5_29	CATCCTGTGACGTGGC	1X_220527
41	13	CATCCTGT	GAGACGTG	P7_53	P5_49	CATCCTGTGAGACGTG	1X_220527
41	14	CATCCTGT	CGTAGACC	P7_53	P5_53	CATCCTGTCGTAGACC	1X_220527
41	15	CATCCTGT	ACGCGCAG	P7_53	P5_57	CATCCTGTACGCGCAG	1X_220527
41	16	CATCCTGT	CGATAGGG	P7_53	P5_61	CATCCTGTCGATAGGG	1X_220527
41	17	CATCCTGT	CCCTTGGA	P7_53	P5_69	CATCCTGTCCCTTGGA	1X_220527
41	18	CATCCTGT	AGAGTAGA	P7_53	P5_4	CATCCTGTAGAGTAGA	1X_220527
41	19	CATCCTGT	CTAAGCCT	P7_53	P5_8	CATCCTGTCTAAGCCT	1X_220527
41	20	CATCCTGT	GTCGGACT	P7_53	P5_12	CATCCTGTGTCGGACT	1X_220527
41	21	CATCCTGT	TCCATCAA	P7_53	P5_16	CATCCTGTTCCATCAA	1X_220527
41	22	CATCCTGT	TGATTGTT	P7_53	P5_36	CATCCTGTTGATTGTT	1X_220527
41	23	CATCCTGT	CGTACCAA	P7_53	P5_40	CATCCTGTCGTACCAA	1X_220527
41	24	CATCCTGT	CGCCAGAT	P7_53	P5_44	CATCCTGTCGCCAGAT	1X_220527
41	25	CATCCTGT	TAAGTTAC	P7_53	P5_48	CATCCTGTTAAGTTAC	1X_220527
41	26	CATCCTGT	TGGGCGGT	P7_53	P5_68	CATCCTGTTGGGCGGT	1X_220527
41	27	CATCCTGT	CAGCAACG	P7_53	P5_20	CATCCTGTCAGCAACG	1X_220527
41	28	CATCCTGT	CGGACTGC	P7_53	P5_24	CATCCTGTCGGACTGC	1X_220527
41	29	CATCCTGT	GGGCTTGG	P7_53	P5_28	CATCCTGTGGGCTTGG	1X_220527
41	30	CATCCTGT	TCCGAGTT	P7_53	P5_32	CATCCTGTTCCGAGTT	1X_220527
41	31	CATCCTGT	CTTTAACA	P7_53	P5_52	CATCCTGTCTTTAACA	1X_220527
41	32	CATCCTGT	TGTTCCTG	P7_53	P5_56	CATCCTGTTGTTCCTG	1X_220527
41	33	CATCCTGT	TACTGACC	P7_53	P5_60	CATCCTGTTACTGACC	1X_220527
41	34	CATCCTGT	GGTGAAGG	P7_53	P5_64	CATCCTGTGGTGAAGG	1X_220527
41	35	CATCCTGT	ACTTGTTG	P7_53	P5_72	CATCCTGTACTTGTTG	1X_220527
41	36	CATCCTGT	TATCCTCT	P7_53	P5_3	CATCCTGTTATCCTCT	1X_220527
41	37	CATCCTGT	AAGGAGTA	P7_53	P5_7	CATCCTGTAAGGAGTA	1X_220527
41	38	CATCCTGT	TGATGAAA	P7_53	P5_11	CATCCTGTTGATGAAA	1X_220527
41	39	CATCCTGT	GTGTATCG	P7_53	P5_15	CATCCTGTGTGTATCG	1X_220527
41	40	CATCCTGT	CCTGCGGG	P7_53	P5_35	CATCCTGTCCTGCGGG	1X_220527
41	41	CATCCTGT	ATGGTCAT	P7_53	P5_39	CATCCTGTATGGTCAT	1X_220527
41	42	CATCCTGT	CTAGAAGT	P7_53	P5_43	CATCCTGTCTAGAAGT	1X_220527
41	43	CATCCTGT	CCACCGTT	P7_53	P5_47	CATCCTGTCCACCGTT	1X_220527
41	44	CATCCTGT	GCCCACGT	P7_53	P5_67	CATCCTGTGCCCACGT	1X_220527
41	45	CATCCTGT	CCTTATGT	P7_53	P5_19	CATCCTGTCCTTATGT	1X_220527
41	46	CATCCTGT	GATTCCCA	P7_53	P5_23	CATCCTGTGATTCCCA	1X_220527
41	47	CATCCTGT	TGCATACT	P7_53	P5_27	CATCCTGTTGCATACT	1X_220527
41	48	CATCCTGT	GCAGCCTC	P7_53	P5_31	CATCCTGTGCAGCCTC	1X_220527
41	49	CATCCTGT	TTAACTTG	P7_53	P5_51	CATCCTGTTTAACTTG	1X_220527
41	50	CATCCTGT	ATCCAGGA	P7_53	P5_55	CATCCTGTATCCAGGA	1X_220527
41	51	CATCCTGT	AATCTACA	P7_53	P5_59	CATCCTGTAATCTACA	1X_220527
41	52	CATCCTGT	AGAGATCT	P7_53	P5_63	CATCCTGTAGAGATCT	1X_220527
41	53	CATCCTGT	AGTCCGAG	P7_53	P5_71	CATCCTGTAGTCCGAG	1X_220527
41	54	CATCCTGT	CTCTCTAT	P7_53	P5_2	CATCCTGTCTCTCTAT	1X_220527
41	55	CATCCTGT	ACTGCATA	P7_53	P5_6	CATCCTGTACTGCATA	1X_220527
41	56	CATCCTGT	AACATGAT	P7_53	P5_10	CATCCTGTAACATGAT	1X_220527
41	57	CATCCTGT	TAACCAAG	P7_53	P5_14	CATCCTGTTAACCAAG	1X_220527
41	58	CATCCTGT	ACGATAAC	P7_53	P5_34	CATCCTGTACGATAAC	1X_220527
41	59	CATCCTGT	GATCATTC	P7_53	P5_38	CATCCTGTGATCATTC	1X_220527
41	60	CATCCTGT	ACCGGCCC	P7_53	P5_42	CATCCTGTACCGGCCC	1X_220527
41	61	CATCCTGT	GAACTCGA	P7_53	P5_46	CATCCTGTGAACTCGA	1X_220527
41	62	CATCCTGT	TCAAGAGC	P7_53	P5_66	CATCCTGTTCAAGAGC	1X_220527
41	63	CATCCTGT	AGGTTGCC	P7_53	P5_18	CATCCTGTAGGTTGCC	1X_220527
41	64	CATCCTGT	ACATTCGT	P7_53	P5_22	CATCCTGTACATTCGT	1X_220527
41	65	CATCCTGT	ATTGGGTC	P7_53	P5_26	CATCCTGTATTGGGTC	1X_220527
41	66	CATCCTGT	GCAAATTT	P7_53	P5_30	CATCCTGTGCAAATTT	1X_220527
41	67	CATCCTGT	TTGCCTAA	P7_53	P5_50	CATCCTGTTTGCCTAA	1X_220527
41	68	CATCCTGT	TATTTGCG	P7_53	P5_54	CATCCTGTTATTTGCG	1X_220527
41	69	CATCCTGT	TCTGGCGA	P7_53	P5_58	CATCCTGTTCTGGCGA	1X_220527
41	70	CATCCTGT	ACTTAGAA	P7_53	P5_62	CATCCTGTACTTAGAA	1X_220527
41	71	CATCCTGT	ATTACCGT	P7_53	P5_70	CATCCTGTATTACCGT	1X_220527
42	0	CGGTTCCC	TAGATCGC	P7_57	P5_1	CGGTTCCCTAGATCGC	1X_220527
42	1	CGGTTCCC	GTAAGGAG	P7_57	P5_5	CGGTTCCCGTAAGGAG	1X_220527
42	2	CGGTTCCC	TGGAAATC	P7_57	P5_9	CGGTTCCCTGGAAATC	1X_220527
42	3	CGGTTCCC	TTTCTAGC	P7_57	P5_13	CGGTTCCCTTTCTAGC	1X_220527
42	4	CGGTTCCC	GCATTAAG	P7_57	P5_33	CGGTTCCCGCATTAAG	1X_220527
42	5	CGGTTCCC	GGCACGGA	P7_57	P5_37	CGGTTCCCGGCACGGA	1X_220527
42	6	CGGTTCCC	CCAGTTTA	P7_57	P5_41	CGGTTCCCCCAGTTTA	1X_220527
42	7	CGGTTCCC	TCACATGG	P7_57	P5_45	CGGTTCCCTCACATGG	1X_220527
42	8	CGGTTCCC	ATCGAATG	P7_57	P5_65	CGGTTCCCATCGAATG	1X_220527
42	9	CGGTTCCC	TTCGTGCA	P7_57	P5_17	CGGTTCCCTTCGTGCA	1X_220527
42	10	CGGTTCCC	GGTTCAAT	P7_57	P5_21	CGGTTCCCGGTTCAAT	1X_220527
42	11	CGGTTCCC	AGCCGTTC	P7_57	P5_25	CGGTTCCCAGCCGTTC	1X_220527
42	12	CGGTTCCC	GACGTGGC	P7_57	P5_29	CGGTTCCCGACGTGGC	1X_220527
42	13	CGGTTCCC	GAGACGTG	P7_57	P5_49	CGGTTCCCGAGACGTG	1X_220527
42	14	CGGTTCCC	CGTAGACC	P7_57	P5_53	CGGTTCCCCGTAGACC	1X_220527
42	15	CGGTTCCC	ACGCGCAG	P7_57	P5_57	CGGTTCCCACGCGCAG	1X_220527
42	16	CGGTTCCC	CGATAGGG	P7_57	P5_61	CGGTTCCCCGATAGGG	1X_220527
42	17	CGGTTCCC	CCCTTGGA	P7_57	P5_69	CGGTTCCCCCCTTGGA	1X_220527
42	18	CGGTTCCC	AGAGTAGA	P7_57	P5_4	CGGTTCCCAGAGTAGA	1X_220527
42	19	CGGTTCCC	CTAAGCCT	P7_57	P5_8	CGGTTCCCCTAAGCCT	1X_220527
42	20	CGGTTCCC	GTCGGACT	P7_57	P5_12	CGGTTCCCGTCGGACT	1X_220527
42	21	CGGTTCCC	TCCATCAA	P7_57	P5_16	CGGTTCCCTCCATCAA	1X_220527
42	22	CGGTTCCC	TGATTGTT	P7_57	P5_36	CGGTTCCCTGATTGTT	1X_220527
42	23	CGGTTCCC	CGTACCAA	P7_57	P5_40	CGGTTCCCCGTACCAA	1X_220527
42	24	CGGTTCCC	CGCCAGAT	P7_57	P5_44	CGGTTCCCCGCCAGAT	1X_220527
42	25	CGGTTCCC	TAAGTTAC	P7_57	P5_48	CGGTTCCCTAAGTTAC	1X_220527
42	26	CGGTTCCC	TGGGCGGT	P7_57	P5_68	CGGTTCCCTGGGCGGT	1X_220527
42	27	CGGTTCCC	CAGCAACG	P7_57	P5_20	CGGTTCCCCAGCAACG	1X_220527
42	28	CGGTTCCC	CGGACTGC	P7_57	P5_24	CGGTTCCCCGGACTGC	1X_220527
42	29	CGGTTCCC	GGGCTTGG	P7_57	P5_28	CGGTTCCCGGGCTTGG	1X_220527
42	30	CGGTTCCC	TCCGAGTT	P7_57	P5_32	CGGTTCCCTCCGAGTT	1X_220527
42	31	CGGTTCCC	CTTTAACA	P7_57	P5_52	CGGTTCCCCTTTAACA	1X_220527
42	32	CGGTTCCC	TGTTCCTG	P7_57	P5_56	CGGTTCCCTGTTCCTG	1X_220527
42	33	CGGTTCCC	TACTGACC	P7_57	P5_60	CGGTTCCCTACTGACC	1X_220527
42	34	CGGTTCCC	GGTGAAGG	P7_57	P5_64	CGGTTCCCGGTGAAGG	1X_220527
42	35	CGGTTCCC	ACTTGTTG	P7_57	P5_72	CGGTTCCCACTTGTTG	1X_220527
42	36	CGGTTCCC	TATCCTCT	P7_57	P5_3	CGGTTCCCTATCCTCT	1X_220527
42	37	CGGTTCCC	AAGGAGTA	P7_57	P5_7	CGGTTCCCAAGGAGTA	1X_220527
42	38	CGGTTCCC	TGATGAAA	P7_57	P5_11	CGGTTCCCTGATGAAA	1X_220527
42	39	CGGTTCCC	GTGTATCG	P7_57	P5_15	CGGTTCCCGTGTATCG	1X_220527
42	40	CGGTTCCC	CCTGCGGG	P7_57	P5_35	CGGTTCCCCCTGCGGG	1X_220527
42	41	CGGTTCCC	ATGGTCAT	P7_57	P5_39	CGGTTCCCATGGTCAT	1X_220527
42	42	CGGTTCCC	CTAGAAGT	P7_57	P5_43	CGGTTCCCCTAGAAGT	1X_220527
42	43	CGGTTCCC	CCACCGTT	P7_57	P5_47	CGGTTCCCCCACCGTT	1X_220527
42	44	CGGTTCCC	GCCCACGT	P7_57	P5_67	CGGTTCCCGCCCACGT	1X_220527
42	45	CGGTTCCC	CCTTATGT	P7_57	P5_19	CGGTTCCCCCTTATGT	1X_220527
42	46	CGGTTCCC	GATTCCCA	P7_57	P5_23	CGGTTCCCGATTCCCA	1X_220527
42	47	CGGTTCCC	TGCATACT	P7_57	P5_27	CGGTTCCCTGCATACT	1X_220527
42	48	CGGTTCCC	GCAGCCTC	P7_57	P5_31	CGGTTCCCGCAGCCTC	1X_220527
42	49	CGGTTCCC	TTAACTTG	P7_57	P5_51	CGGTTCCCTTAACTTG	1X_220527
42	50	CGGTTCCC	ATCCAGGA	P7_57	P5_55	CGGTTCCCATCCAGGA	1X_220527
42	51	CGGTTCCC	AATCTACA	P7_57	P5_59	CGGTTCCCAATCTACA	1X_220527
42	52	CGGTTCCC	AGAGATCT	P7_57	P5_63	CGGTTCCCAGAGATCT	1X_220527
42	53	CGGTTCCC	AGTCCGAG	P7_57	P5_71	CGGTTCCCAGTCCGAG	1X_220527
42	54	CGGTTCCC	CTCTCTAT	P7_57	P5_2	CGGTTCCCCTCTCTAT	1X_220527
42	55	CGGTTCCC	ACTGCATA	P7_57	P5_6	CGGTTCCCACTGCATA	1X_220527
42	56	CGGTTCCC	AACATGAT	P7_57	P5_10	CGGTTCCCAACATGAT	1X_220527
42	57	CGGTTCCC	TAACCAAG	P7_57	P5_14	CGGTTCCCTAACCAAG	1X_220527
42	58	CGGTTCCC	ACGATAAC	P7_57	P5_34	CGGTTCCCACGATAAC	1X_220527
42	59	CGGTTCCC	GATCATTC	P7_57	P5_38	CGGTTCCCGATCATTC	1X_220527
42	60	CGGTTCCC	ACCGGCCC	P7_57	P5_42	CGGTTCCCACCGGCCC	1X_220527
42	61	CGGTTCCC	GAACTCGA	P7_57	P5_46	CGGTTCCCGAACTCGA	1X_220527
42	62	CGGTTCCC	TCAAGAGC	P7_57	P5_66	CGGTTCCCTCAAGAGC	1X_220527
42	63	CGGTTCCC	AGGTTGCC	P7_57	P5_18	CGGTTCCCAGGTTGCC	1X_220527
42	64	CGGTTCCC	ACATTCGT	P7_57	P5_22	CGGTTCCCACATTCGT	1X_220527
42	65	CGGTTCCC	ATTGGGTC	P7_57	P5_26	CGGTTCCCATTGGGTC	1X_220527
42	66	CGGTTCCC	GCAAATTT	P7_57	P5_30	CGGTTCCCGCAAATTT	1X_220527
42	67	CGGTTCCC	TTGCCTAA	P7_57	P5_50	CGGTTCCCTTGCCTAA	1X_220527
42	68	CGGTTCCC	TATTTGCG	P7_57	P5_54	CGGTTCCCTATTTGCG	1X_220527
42	69	CGGTTCCC	TCTGGCGA	P7_57	P5_58	CGGTTCCCTCTGGCGA	1X_220527
42	70	CGGTTCCC	ACTTAGAA	P7_57	P5_62	CGGTTCCCACTTAGAA	1X_220527
42	71	CGGTTCCC	ATTACCGT	P7_57	P5_70	CGGTTCCCATTACCGT	1X_220527
43	0	AAACGGTC	TAGATCGC	P7_61	P5_1	AAACGGTCTAGATCGC	1X_220527
43	1	AAACGGTC	GTAAGGAG	P7_61	P5_5	AAACGGTCGTAAGGAG	1X_220527
43	2	AAACGGTC	TGGAAATC	P7_61	P5_9	AAACGGTCTGGAAATC	1X_220527
43	3	AAACGGTC	TTTCTAGC	P7_61	P5_13	AAACGGTCTTTCTAGC	1X_220527
43	4	AAACGGTC	GCATTAAG	P7_61	P5_33	AAACGGTCGCATTAAG	1X_220527
43	5	AAACGGTC	GGCACGGA	P7_61	P5_37	AAACGGTCGGCACGGA	1X_220527
43	6	AAACGGTC	CCAGTTTA	P7_61	P5_41	AAACGGTCCCAGTTTA	1X_220527
43	7	AAACGGTC	TCACATGG	P7_61	P5_45	AAACGGTCTCACATGG	1X_220527
43	8	AAACGGTC	ATCGAATG	P7_61	P5_65	AAACGGTCATCGAATG	1X_220527
43	9	AAACGGTC	TTCGTGCA	P7_61	P5_17	AAACGGTCTTCGTGCA	1X_220527
43	10	AAACGGTC	GGTTCAAT	P7_61	P5_21	AAACGGTCGGTTCAAT	1X_220527
43	11	AAACGGTC	AGCCGTTC	P7_61	P5_25	AAACGGTCAGCCGTTC	1X_220527
43	12	AAACGGTC	GACGTGGC	P7_61	P5_29	AAACGGTCGACGTGGC	1X_220527
43	13	AAACGGTC	GAGACGTG	P7_61	P5_49	AAACGGTCGAGACGTG	1X_220527
43	14	AAACGGTC	CGTAGACC	P7_61	P5_53	AAACGGTCCGTAGACC	1X_220527
43	15	AAACGGTC	ACGCGCAG	P7_61	P5_57	AAACGGTCACGCGCAG	1X_220527
43	16	AAACGGTC	CGATAGGG	P7_61	P5_61	AAACGGTCCGATAGGG	1X_220527
43	17	AAACGGTC	CCCTTGGA	P7_61	P5_69	AAACGGTCCCCTTGGA	1X_220527
43	18	AAACGGTC	AGAGTAGA	P7_61	P5_4	AAACGGTCAGAGTAGA	1X_220527
43	19	AAACGGTC	CTAAGCCT	P7_61	P5_8	AAACGGTCCTAAGCCT	1X_220527
43	20	AAACGGTC	GTCGGACT	P7_61	P5_12	AAACGGTCGTCGGACT	1X_220527
43	21	AAACGGTC	TCCATCAA	P7_61	P5_16	AAACGGTCTCCATCAA	1X_220527
43	22	AAACGGTC	TGATTGTT	P7_61	P5_36	AAACGGTCTGATTGTT	1X_220527
43	23	AAACGGTC	CGTACCAA	P7_61	P5_40	AAACGGTCCGTACCAA	1X_220527
43	24	AAACGGTC	CGCCAGAT	P7_61	P5_44	AAACGGTCCGCCAGAT	1X_220527
43	25	AAACGGTC	TAAGTTAC	P7_61	P5_48	AAACGGTCTAAGTTAC	1X_220527
43	26	AAACGGTC	TGGGCGGT	P7_61	P5_68	AAACGGTCTGGGCGGT	1X_220527
43	27	AAACGGTC	CAGCAACG	P7_61	P5_20	AAACGGTCCAGCAACG	1X_220527
43	28	AAACGGTC	CGGACTGC	P7_61	P5_24	AAACGGTCCGGACTGC	1X_220527
43	29	AAACGGTC	GGGCTTGG	P7_61	P5_28	AAACGGTCGGGCTTGG	1X_220527
43	30	AAACGGTC	TCCGAGTT	P7_61	P5_32	AAACGGTCTCCGAGTT	1X_220527
43	31	AAACGGTC	CTTTAACA	P7_61	P5_52	AAACGGTCCTTTAACA	1X_220527
43	32	AAACGGTC	TGTTCCTG	P7_61	P5_56	AAACGGTCTGTTCCTG	1X_220527
43	33	AAACGGTC	TACTGACC	P7_61	P5_60	AAACGGTCTACTGACC	1X_220527
43	34	AAACGGTC	GGTGAAGG	P7_61	P5_64	AAACGGTCGGTGAAGG	1X_220527
43	35	AAACGGTC	ACTTGTTG	P7_61	P5_72	AAACGGTCACTTGTTG	1X_220527
43	36	AAACGGTC	TATCCTCT	P7_61	P5_3	AAACGGTCTATCCTCT	1X_220527
43	37	AAACGGTC	AAGGAGTA	P7_61	P5_7	AAACGGTCAAGGAGTA	1X_220527
43	38	AAACGGTC	TGATGAAA	P7_61	P5_11	AAACGGTCTGATGAAA	1X_220527
43	39	AAACGGTC	GTGTATCG	P7_61	P5_15	AAACGGTCGTGTATCG	1X_220527
43	40	AAACGGTC	CCTGCGGG	P7_61	P5_35	AAACGGTCCCTGCGGG	1X_220527
43	41	AAACGGTC	ATGGTCAT	P7_61	P5_39	AAACGGTCATGGTCAT	1X_220527
43	42	AAACGGTC	CTAGAAGT	P7_61	P5_43	AAACGGTCCTAGAAGT	1X_220527
43	43	AAACGGTC	CCACCGTT	P7_61	P5_47	AAACGGTCCCACCGTT	1X_220527
43	44	AAACGGTC	GCCCACGT	P7_61	P5_67	AAACGGTCGCCCACGT	1X_220527
43	45	AAACGGTC	CCTTATGT	P7_61	P5_19	AAACGGTCCCTTATGT	1X_220527
43	46	AAACGGTC	GATTCCCA	P7_61	P5_23	AAACGGTCGATTCCCA	1X_220527
43	47	AAACGGTC	TGCATACT	P7_61	P5_27	AAACGGTCTGCATACT	1X_220527
43	48	AAACGGTC	GCAGCCTC	P7_61	P5_31	AAACGGTCGCAGCCTC	1X_220527
43	49	AAACGGTC	TTAACTTG	P7_61	P5_51	AAACGGTCTTAACTTG	1X_220527
43	50	AAACGGTC	ATCCAGGA	P7_61	P5_55	AAACGGTCATCCAGGA	1X_220527
43	51	AAACGGTC	AATCTACA	P7_61	P5_59	AAACGGTCAATCTACA	1X_220527
43	52	AAACGGTC	AGAGATCT	P7_61	P5_63	AAACGGTCAGAGATCT	1X_220527
43	53	AAACGGTC	AGTCCGAG	P7_61	P5_71	AAACGGTCAGTCCGAG	1X_220527
43	54	AAACGGTC	CTCTCTAT	P7_61	P5_2	AAACGGTCCTCTCTAT	1X_220527
43	55	AAACGGTC	ACTGCATA	P7_61	P5_6	AAACGGTCACTGCATA	1X_220527
43	56	AAACGGTC	AACATGAT	P7_61	P5_10	AAACGGTCAACATGAT	1X_220527
43	57	AAACGGTC	TAACCAAG	P7_61	P5_14	AAACGGTCTAACCAAG	1X_220527
43	58	AAACGGTC	ACGATAAC	P7_61	P5_34	AAACGGTCACGATAAC	1X_220527
43	59	AAACGGTC	GATCATTC	P7_61	P5_38	AAACGGTCGATCATTC	1X_220527
43	60	AAACGGTC	ACCGGCCC	P7_61	P5_42	AAACGGTCACCGGCCC	1X_220527
43	61	AAACGGTC	GAACTCGA	P7_61	P5_46	AAACGGTCGAACTCGA	1X_220527
43	62	AAACGGTC	TCAAGAGC	P7_61	P5_66	AAACGGTCTCAAGAGC	1X_220527
43	63	AAACGGTC	AGGTTGCC	P7_61	P5_18	AAACGGTCAGGTTGCC	1X_220527
43	64	AAACGGTC	ACATTCGT	P7_61	P5_22	AAACGGTCACATTCGT	1X_220527
43	65	AAACGGTC	ATTGGGTC	P7_61	P5_26	AAACGGTCATTGGGTC	1X_220527
43	66	AAACGGTC	GCAAATTT	P7_61	P5_30	AAACGGTCGCAAATTT	1X_220527
43	67	AAACGGTC	TTGCCTAA	P7_61	P5_50	AAACGGTCTTGCCTAA	1X_220527
43	68	AAACGGTC	TATTTGCG	P7_61	P5_54	AAACGGTCTATTTGCG	1X_220527
43	69	AAACGGTC	TCTGGCGA	P7_61	P5_58	AAACGGTCTCTGGCGA	1X_220527
43	70	AAACGGTC	ACTTAGAA	P7_61	P5_62	AAACGGTCACTTAGAA	1X_220527
43	71	AAACGGTC	ATTACCGT	P7_61	P5_70	AAACGGTCATTACCGT	1X_220527
44	0	CGGCCAAT	TAGATCGC	P7_69	P5_1	CGGCCAATTAGATCGC	1X_220527
44	1	CGGCCAAT	GTAAGGAG	P7_69	P5_5	CGGCCAATGTAAGGAG	1X_220527
44	2	CGGCCAAT	TGGAAATC	P7_69	P5_9	CGGCCAATTGGAAATC	1X_220527
44	3	CGGCCAAT	TTTCTAGC	P7_69	P5_13	CGGCCAATTTTCTAGC	1X_220527
44	4	CGGCCAAT	GCATTAAG	P7_69	P5_33	CGGCCAATGCATTAAG	1X_220527
44	5	CGGCCAAT	GGCACGGA	P7_69	P5_37	CGGCCAATGGCACGGA	1X_220527
44	6	CGGCCAAT	CCAGTTTA	P7_69	P5_41	CGGCCAATCCAGTTTA	1X_220527
44	7	CGGCCAAT	TCACATGG	P7_69	P5_45	CGGCCAATTCACATGG	1X_220527
44	8	CGGCCAAT	ATCGAATG	P7_69	P5_65	CGGCCAATATCGAATG	1X_220527
44	9	CGGCCAAT	TTCGTGCA	P7_69	P5_17	CGGCCAATTTCGTGCA	1X_220527
44	10	CGGCCAAT	GGTTCAAT	P7_69	P5_21	CGGCCAATGGTTCAAT	1X_220527
44	11	CGGCCAAT	AGCCGTTC	P7_69	P5_25	CGGCCAATAGCCGTTC	1X_220527
44	12	CGGCCAAT	GACGTGGC	P7_69	P5_29	CGGCCAATGACGTGGC	1X_220527
44	13	CGGCCAAT	GAGACGTG	P7_69	P5_49	CGGCCAATGAGACGTG	1X_220527
44	14	CGGCCAAT	CGTAGACC	P7_69	P5_53	CGGCCAATCGTAGACC	1X_220527
44	15	CGGCCAAT	ACGCGCAG	P7_69	P5_57	CGGCCAATACGCGCAG	1X_220527
44	16	CGGCCAAT	CGATAGGG	P7_69	P5_61	CGGCCAATCGATAGGG	1X_220527
44	17	CGGCCAAT	CCCTTGGA	P7_69	P5_69	CGGCCAATCCCTTGGA	1X_220527
44	18	CGGCCAAT	AGAGTAGA	P7_69	P5_4	CGGCCAATAGAGTAGA	1X_220527
44	19	CGGCCAAT	CTAAGCCT	P7_69	P5_8	CGGCCAATCTAAGCCT	1X_220527
44	20	CGGCCAAT	GTCGGACT	P7_69	P5_12	CGGCCAATGTCGGACT	1X_220527
44	21	CGGCCAAT	TCCATCAA	P7_69	P5_16	CGGCCAATTCCATCAA	1X_220527
44	22	CGGCCAAT	TGATTGTT	P7_69	P5_36	CGGCCAATTGATTGTT	1X_220527
44	23	CGGCCAAT	CGTACCAA	P7_69	P5_40	CGGCCAATCGTACCAA	1X_220527
44	24	CGGCCAAT	CGCCAGAT	P7_69	P5_44	CGGCCAATCGCCAGAT	1X_220527
44	25	CGGCCAAT	TAAGTTAC	P7_69	P5_48	CGGCCAATTAAGTTAC	1X_220527
44	26	CGGCCAAT	TGGGCGGT	P7_69	P5_68	CGGCCAATTGGGCGGT	1X_220527
44	27	CGGCCAAT	CAGCAACG	P7_69	P5_20	CGGCCAATCAGCAACG	1X_220527
44	28	CGGCCAAT	CGGACTGC	P7_69	P5_24	CGGCCAATCGGACTGC	1X_220527
44	29	CGGCCAAT	GGGCTTGG	P7_69	P5_28	CGGCCAATGGGCTTGG	1X_220527
44	30	CGGCCAAT	TCCGAGTT	P7_69	P5_32	CGGCCAATTCCGAGTT	1X_220527
44	31	CGGCCAAT	CTTTAACA	P7_69	P5_52	CGGCCAATCTTTAACA	1X_220527
44	32	CGGCCAAT	TGTTCCTG	P7_69	P5_56	CGGCCAATTGTTCCTG	1X_220527
44	33	CGGCCAAT	TACTGACC	P7_69	P5_60	CGGCCAATTACTGACC	1X_220527
44	34	CGGCCAAT	GGTGAAGG	P7_69	P5_64	CGGCCAATGGTGAAGG	1X_220527
44	35	CGGCCAAT	ACTTGTTG	P7_69	P5_72	CGGCCAATACTTGTTG	1X_220527
44	36	CGGCCAAT	TATCCTCT	P7_69	P5_3	CGGCCAATTATCCTCT	1X_220527
44	37	CGGCCAAT	AAGGAGTA	P7_69	P5_7	CGGCCAATAAGGAGTA	1X_220527
44	38	CGGCCAAT	TGATGAAA	P7_69	P5_11	CGGCCAATTGATGAAA	1X_220527
44	39	CGGCCAAT	GTGTATCG	P7_69	P5_15	CGGCCAATGTGTATCG	1X_220527
44	40	CGGCCAAT	CCTGCGGG	P7_69	P5_35	CGGCCAATCCTGCGGG	1X_220527
44	41	CGGCCAAT	ATGGTCAT	P7_69	P5_39	CGGCCAATATGGTCAT	1X_220527
44	42	CGGCCAAT	CTAGAAGT	P7_69	P5_43	CGGCCAATCTAGAAGT	1X_220527
44	43	CGGCCAAT	CCACCGTT	P7_69	P5_47	CGGCCAATCCACCGTT	1X_220527
44	44	CGGCCAAT	GCCCACGT	P7_69	P5_67	CGGCCAATGCCCACGT	1X_220527
44	45	CGGCCAAT	CCTTATGT	P7_69	P5_19	CGGCCAATCCTTATGT	1X_220527
44	46	CGGCCAAT	GATTCCCA	P7_69	P5_23	CGGCCAATGATTCCCA	1X_220527
44	47	CGGCCAAT	TGCATACT	P7_69	P5_27	CGGCCAATTGCATACT	1X_220527
44	48	CGGCCAAT	GCAGCCTC	P7_69	P5_31	CGGCCAATGCAGCCTC	1X_220527
44	49	CGGCCAAT	TTAACTTG	P7_69	P5_51	CGGCCAATTTAACTTG	1X_220527
44	50	CGGCCAAT	ATCCAGGA	P7_69	P5_55	CGGCCAATATCCAGGA	1X_220527
44	51	CGGCCAAT	AATCTACA	P7_69	P5_59	CGGCCAATAATCTACA	1X_220527
44	52	CGGCCAAT	AGAGATCT	P7_69	P5_63	CGGCCAATAGAGATCT	1X_220527
44	53	CGGCCAAT	AGTCCGAG	P7_69	P5_71	CGGCCAATAGTCCGAG	1X_220527
44	54	CGGCCAAT	CTCTCTAT	P7_69	P5_2	CGGCCAATCTCTCTAT	1X_220527
44	55	CGGCCAAT	ACTGCATA	P7_69	P5_6	CGGCCAATACTGCATA	1X_220527
44	56	CGGCCAAT	AACATGAT	P7_69	P5_10	CGGCCAATAACATGAT	1X_220527
44	57	CGGCCAAT	TAACCAAG	P7_69	P5_14	CGGCCAATTAACCAAG	1X_220527
44	58	CGGCCAAT	ACGATAAC	P7_69	P5_34	CGGCCAATACGATAAC	1X_220527
44	59	CGGCCAAT	GATCATTC	P7_69	P5_38	CGGCCAATGATCATTC	1X_220527
44	60	CGGCCAAT	ACCGGCCC	P7_69	P5_42	CGGCCAATACCGGCCC	1X_220527
44	61	CGGCCAAT	GAACTCGA	P7_69	P5_46	CGGCCAATGAACTCGA	1X_220527
44	62	CGGCCAAT	TCAAGAGC	P7_69	P5_66	CGGCCAATTCAAGAGC	1X_220527
44	63	CGGCCAAT	AGGTTGCC	P7_69	P5_18	CGGCCAATAGGTTGCC	1X_220527
44	64	CGGCCAAT	ACATTCGT	P7_69	P5_22	CGGCCAATACATTCGT	1X_220527
44	65	CGGCCAAT	ATTGGGTC	P7_69	P5_26	CGGCCAATATTGGGTC	1X_220527
44	66	CGGCCAAT	GCAAATTT	P7_69	P5_30	CGGCCAATGCAAATTT	1X_220527
44	67	CGGCCAAT	TTGCCTAA	P7_69	P5_50	CGGCCAATTTGCCTAA	1X_220527
44	68	CGGCCAAT	TATTTGCG	P7_69	P5_54	CGGCCAATTATTTGCG	1X_220527
44	69	CGGCCAAT	TCTGGCGA	P7_69	P5_58	CGGCCAATTCTGGCGA	1X_220527
44	70	CGGCCAAT	ACTTAGAA	P7_69	P5_62	CGGCCAATACTTAGAA	1X_220527
44	71	CGGCCAAT	ATTACCGT	P7_69	P5_70	CGGCCAATATTACCGT	1X_220527
45	0	TGGGTTTC	CTCTCTAT	P7_18	P5_2	TGGGTTTCCTCTCTAT	0.5X_220527
45	1	TGGGTTTC	ACTGCATA	P7_18	P5_6	TGGGTTTCACTGCATA	0.5X_220527
45	2	TGGGTTTC	AACATGAT	P7_18	P5_10	TGGGTTTCAACATGAT	0.5X_220527
45	3	TGGGTTTC	TAACCAAG	P7_18	P5_14	TGGGTTTCTAACCAAG	0.5X_220527
45	4	TGGGTTTC	ACGATAAC	P7_18	P5_34	TGGGTTTCACGATAAC	0.5X_220527
45	5	TGGGTTTC	GATCATTC	P7_18	P5_38	TGGGTTTCGATCATTC	0.5X_220527
45	6	TGGGTTTC	ACCGGCCC	P7_18	P5_42	TGGGTTTCACCGGCCC	0.5X_220527
45	7	TGGGTTTC	GAACTCGA	P7_18	P5_46	TGGGTTTCGAACTCGA	0.5X_220527
45	8	TGGGTTTC	TCAAGAGC	P7_18	P5_66	TGGGTTTCTCAAGAGC	0.5X_220527
45	9	TGGGTTTC	AGGTTGCC	P7_18	P5_18	TGGGTTTCAGGTTGCC	0.5X_220527
45	10	TGGGTTTC	ACATTCGT	P7_18	P5_22	TGGGTTTCACATTCGT	0.5X_220527
45	11	TGGGTTTC	ATTGGGTC	P7_18	P5_26	TGGGTTTCATTGGGTC	0.5X_220527
45	12	TGGGTTTC	GCAAATTT	P7_18	P5_30	TGGGTTTCGCAAATTT	0.5X_220527
45	13	TGGGTTTC	TTGCCTAA	P7_18	P5_50	TGGGTTTCTTGCCTAA	0.5X_220527
45	14	TGGGTTTC	TATTTGCG	P7_18	P5_54	TGGGTTTCTATTTGCG	0.5X_220527
45	15	TGGGTTTC	TCTGGCGA	P7_18	P5_58	TGGGTTTCTCTGGCGA	0.5X_220527
45	16	TGGGTTTC	ACTTAGAA	P7_18	P5_62	TGGGTTTCACTTAGAA	0.5X_220527
45	17	TGGGTTTC	ATTACCGT	P7_18	P5_70	TGGGTTTCATTACCGT	0.5X_220527
45	18	TGGGTTTC	TAGATCGC	P7_18	P5_1	TGGGTTTCTAGATCGC	0.5X_220527
45	19	TGGGTTTC	GTAAGGAG	P7_18	P5_5	TGGGTTTCGTAAGGAG	0.5X_220527
45	20	TGGGTTTC	TGGAAATC	P7_18	P5_9	TGGGTTTCTGGAAATC	0.5X_220527
45	21	TGGGTTTC	TTTCTAGC	P7_18	P5_13	TGGGTTTCTTTCTAGC	0.5X_220527
45	22	TGGGTTTC	GCATTAAG	P7_18	P5_33	TGGGTTTCGCATTAAG	0.5X_220527
45	23	TGGGTTTC	GGCACGGA	P7_18	P5_37	TGGGTTTCGGCACGGA	0.5X_220527
45	24	TGGGTTTC	CCAGTTTA	P7_18	P5_41	TGGGTTTCCCAGTTTA	0.5X_220527
45	25	TGGGTTTC	TCACATGG	P7_18	P5_45	TGGGTTTCTCACATGG	0.5X_220527
45	26	TGGGTTTC	ATCGAATG	P7_18	P5_65	TGGGTTTCATCGAATG	0.5X_220527
45	27	TGGGTTTC	TTCGTGCA	P7_18	P5_17	TGGGTTTCTTCGTGCA	0.5X_220527
45	28	TGGGTTTC	GGTTCAAT	P7_18	P5_21	TGGGTTTCGGTTCAAT	0.5X_220527
45	29	TGGGTTTC	AGCCGTTC	P7_18	P5_25	TGGGTTTCAGCCGTTC	0.5X_220527
45	30	TGGGTTTC	GACGTGGC	P7_18	P5_29	TGGGTTTCGACGTGGC	0.5X_220527
45	31	TGGGTTTC	GAGACGTG	P7_18	P5_49	TGGGTTTCGAGACGTG	0.5X_220527
45	32	TGGGTTTC	CGTAGACC	P7_18	P5_53	TGGGTTTCCGTAGACC	0.5X_220527
45	33	TGGGTTTC	ACGCGCAG	P7_18	P5_57	TGGGTTTCACGCGCAG	0.5X_220527
45	34	TGGGTTTC	CGATAGGG	P7_18	P5_61	TGGGTTTCCGATAGGG	0.5X_220527
45	35	TGGGTTTC	CCCTTGGA	P7_18	P5_69	TGGGTTTCCCCTTGGA	0.5X_220527
45	36	TGGGTTTC	AGAGTAGA	P7_18	P5_4	TGGGTTTCAGAGTAGA	0.5X_220527
45	37	TGGGTTTC	CTAAGCCT	P7_18	P5_8	TGGGTTTCCTAAGCCT	0.5X_220527
45	38	TGGGTTTC	GTCGGACT	P7_18	P5_12	TGGGTTTCGTCGGACT	0.5X_220527
45	39	TGGGTTTC	TCCATCAA	P7_18	P5_16	TGGGTTTCTCCATCAA	0.5X_220527
45	40	TGGGTTTC	TGATTGTT	P7_18	P5_36	TGGGTTTCTGATTGTT	0.5X_220527
45	41	TGGGTTTC	CGTACCAA	P7_18	P5_40	TGGGTTTCCGTACCAA	0.5X_220527
45	42	TGGGTTTC	CGCCAGAT	P7_18	P5_44	TGGGTTTCCGCCAGAT	0.5X_220527
45	43	TGGGTTTC	TAAGTTAC	P7_18	P5_48	TGGGTTTCTAAGTTAC	0.5X_220527
45	44	TGGGTTTC	TGGGCGGT	P7_18	P5_68	TGGGTTTCTGGGCGGT	0.5X_220527
45	45	TGGGTTTC	CAGCAACG	P7_18	P5_20	TGGGTTTCCAGCAACG	0.5X_220527
45	46	TGGGTTTC	CGGACTGC	P7_18	P5_24	TGGGTTTCCGGACTGC	0.5X_220527
45	47	TGGGTTTC	GGGCTTGG	P7_18	P5_28	TGGGTTTCGGGCTTGG	0.5X_220527
45	48	TGGGTTTC	TCCGAGTT	P7_18	P5_32	TGGGTTTCTCCGAGTT	0.5X_220527
45	49	TGGGTTTC	CTTTAACA	P7_18	P5_52	TGGGTTTCCTTTAACA	0.5X_220527
45	50	TGGGTTTC	TGTTCCTG	P7_18	P5_56	TGGGTTTCTGTTCCTG	0.5X_220527
45	51	TGGGTTTC	TACTGACC	P7_18	P5_60	TGGGTTTCTACTGACC	0.5X_220527
45	52	TGGGTTTC	GGTGAAGG	P7_18	P5_64	TGGGTTTCGGTGAAGG	0.5X_220527
45	53	TGGGTTTC	ACTTGTTG	P7_18	P5_72	TGGGTTTCACTTGTTG	0.5X_220527
45	54	TGGGTTTC	TATCCTCT	P7_18	P5_3	TGGGTTTCTATCCTCT	0.5X_220527
45	55	TGGGTTTC	AAGGAGTA	P7_18	P5_7	TGGGTTTCAAGGAGTA	0.5X_220527
45	56	TGGGTTTC	TGATGAAA	P7_18	P5_11	TGGGTTTCTGATGAAA	0.5X_220527
45	57	TGGGTTTC	GTGTATCG	P7_18	P5_15	TGGGTTTCGTGTATCG	0.5X_220527
45	58	TGGGTTTC	CCTGCGGG	P7_18	P5_35	TGGGTTTCCCTGCGGG	0.5X_220527
45	59	TGGGTTTC	ATGGTCAT	P7_18	P5_39	TGGGTTTCATGGTCAT	0.5X_220527
45	60	TGGGTTTC	CTAGAAGT	P7_18	P5_43	TGGGTTTCCTAGAAGT	0.5X_220527
45	61	TGGGTTTC	CCACCGTT	P7_18	P5_47	TGGGTTTCCCACCGTT	0.5X_220527
45	62	TGGGTTTC	GCCCACGT	P7_18	P5_67	TGGGTTTCGCCCACGT	0.5X_220527
45	63	TGGGTTTC	CCTTATGT	P7_18	P5_19	TGGGTTTCCCTTATGT	0.5X_220527
45	64	TGGGTTTC	GATTCCCA	P7_18	P5_23	TGGGTTTCGATTCCCA	0.5X_220527
45	65	TGGGTTTC	TGCATACT	P7_18	P5_27	TGGGTTTCTGCATACT	0.5X_220527
45	66	TGGGTTTC	GCAGCCTC	P7_18	P5_31	TGGGTTTCGCAGCCTC	0.5X_220527
45	67	TGGGTTTC	TTAACTTG	P7_18	P5_51	TGGGTTTCTTAACTTG	0.5X_220527
45	68	TGGGTTTC	ATCCAGGA	P7_18	P5_55	TGGGTTTCATCCAGGA	0.5X_220527
45	69	TGGGTTTC	AATCTACA	P7_18	P5_59	TGGGTTTCAATCTACA	0.5X_220527
45	70	TGGGTTTC	AGAGATCT	P7_18	P5_63	TGGGTTTCAGAGATCT	0.5X_220527
45	71	TGGGTTTC	AGTCCGAG	P7_18	P5_71	TGGGTTTCAGTCCGAG	0.5X_220527
46	0	TTCCATAT	CTCTCTAT	P7_22	P5_2	TTCCATATCTCTCTAT	0.5X_220527
46	1	TTCCATAT	ACTGCATA	P7_22	P5_6	TTCCATATACTGCATA	0.5X_220527
46	2	TTCCATAT	AACATGAT	P7_22	P5_10	TTCCATATAACATGAT	0.5X_220527
46	3	TTCCATAT	TAACCAAG	P7_22	P5_14	TTCCATATTAACCAAG	0.5X_220527
46	4	TTCCATAT	ACGATAAC	P7_22	P5_34	TTCCATATACGATAAC	0.5X_220527
46	5	TTCCATAT	GATCATTC	P7_22	P5_38	TTCCATATGATCATTC	0.5X_220527
46	6	TTCCATAT	ACCGGCCC	P7_22	P5_42	TTCCATATACCGGCCC	0.5X_220527
46	7	TTCCATAT	GAACTCGA	P7_22	P5_46	TTCCATATGAACTCGA	0.5X_220527
46	8	TTCCATAT	TCAAGAGC	P7_22	P5_66	TTCCATATTCAAGAGC	0.5X_220527
46	9	TTCCATAT	AGGTTGCC	P7_22	P5_18	TTCCATATAGGTTGCC	0.5X_220527
46	10	TTCCATAT	ACATTCGT	P7_22	P5_22	TTCCATATACATTCGT	0.5X_220527
46	11	TTCCATAT	ATTGGGTC	P7_22	P5_26	TTCCATATATTGGGTC	0.5X_220527
46	12	TTCCATAT	GCAAATTT	P7_22	P5_30	TTCCATATGCAAATTT	0.5X_220527
46	13	TTCCATAT	TTGCCTAA	P7_22	P5_50	TTCCATATTTGCCTAA	0.5X_220527
46	14	TTCCATAT	TATTTGCG	P7_22	P5_54	TTCCATATTATTTGCG	0.5X_220527
46	15	TTCCATAT	TCTGGCGA	P7_22	P5_58	TTCCATATTCTGGCGA	0.5X_220527
46	16	TTCCATAT	ACTTAGAA	P7_22	P5_62	TTCCATATACTTAGAA	0.5X_220527
46	17	TTCCATAT	ATTACCGT	P7_22	P5_70	TTCCATATATTACCGT	0.5X_220527
46	18	TTCCATAT	TAGATCGC	P7_22	P5_1	TTCCATATTAGATCGC	0.5X_220527
46	19	TTCCATAT	GTAAGGAG	P7_22	P5_5	TTCCATATGTAAGGAG	0.5X_220527
46	20	TTCCATAT	TGGAAATC	P7_22	P5_9	TTCCATATTGGAAATC	0.5X_220527
46	21	TTCCATAT	TTTCTAGC	P7_22	P5_13	TTCCATATTTTCTAGC	0.5X_220527
46	22	TTCCATAT	GCATTAAG	P7_22	P5_33	TTCCATATGCATTAAG	0.5X_220527
46	23	TTCCATAT	GGCACGGA	P7_22	P5_37	TTCCATATGGCACGGA	0.5X_220527
46	24	TTCCATAT	CCAGTTTA	P7_22	P5_41	TTCCATATCCAGTTTA	0.5X_220527
46	25	TTCCATAT	TCACATGG	P7_22	P5_45	TTCCATATTCACATGG	0.5X_220527
46	26	TTCCATAT	ATCGAATG	P7_22	P5_65	TTCCATATATCGAATG	0.5X_220527
46	27	TTCCATAT	TTCGTGCA	P7_22	P5_17	TTCCATATTTCGTGCA	0.5X_220527
[truncated: 3,185 more rows]
